# Supplementary material
Source: PubMed Central journal article supplement (PMC4041531)
Supplement: NIHMS577174-supplement-Supporting_data__SI.pdf [file NIHMS577174-supplement-Supporting_data__SI.pdf]

# Simultaneous Structure-Activity Studies and Arming of Natural Products by CH Amination Reveal Cellular Targets of Eupalmerin Acetate

Jing Li,<sup>†,‡</sup> Justin S. Cisar,<sup>‡</sup> Congying Zhou,<sup>†</sup> Brunilda A. Vera,<sup>§</sup> Howard Williams,<sup>†</sup>  
Abimael D. Rodriguez,<sup>§</sup> Benjamin F. Cravatt,<sup>‡</sup> Daniel Romo\*<sup>†,‡</sup>

<sup>†</sup>Department of Chemistry and the <sup>‡</sup>Natural Products LINCHPIN Laboratory, Texas  
A&M University, P.O. Box 30012, College Station, TX 77842-3012, USA

<sup>‡</sup>The Skaggs Institute for Chemical Biology and Department of Chemical Physiology,  
and The Scripps Research Institute Molecular Screening Center, The Scripps Research  
Institute, 10550 North Torrey Pines Road, La Jolla, California 92037

<sup>§</sup>Department of Chemistry, University of Puerto Rico, P.O. Box 23346, UPR Station, San  
Juan, 00931-3346, Puerto Rico

## Supplementary Information

|                                                                                                                                                                                                                                                                                        |         |
|----------------------------------------------------------------------------------------------------------------------------------------------------------------------------------------------------------------------------------------------------------------------------------------|---------|
| <b>General synthesis procedures</b>                                                                                                                                                                                                                                                    | S2-S3   |
| <b>Table S1</b> (CH amination/aziridination condition optimization for GAME)                                                                                                                                                                                                           | S3      |
| <b>Preparation of nitrene precursor, sulfamate 8</b>                                                                                                                                                                                                                                   | S3-S5   |
| <b>C-H amination/aziridination of natural products/drugs</b>                                                                                                                                                                                                                           | S5-S22  |
| <b>Table S2</b> (NMR assignment for compound <b>24b</b> )                                                                                                                                                                                                                              | S18     |
| <b>Table S3</b> (NMR comparison of inner salts of simple model<br>compounds and complex natural products)                                                                                                                                                                              | S19     |
| <b>Figure S1</b> (ORTEP representation of X-ray structure of <b>23a</b> )                                                                                                                                                                                                              | S25     |
| <b>Procedure for cleavage of sulfamate</b>                                                                                                                                                                                                                                             | S24-S26 |
| <b>Biological methods</b>                                                                                                                                                                                                                                                              | S26-S30 |
| Supplementary <b>Table S4</b> (Chemoproteomic list of high affinity<br>EuPA targets) and <b>Figures S2A</b> (Western blot from HEK293T<br>cells overexpressing identified targets) and <b>S2B</b> ( <i>In situ</i> EuPAYne<br>labeling and quantitation of labeling IC <sub>50</sub> ) | S30-S31 |
| <b><sup>1</sup>H and <sup>13</sup>C NMR spectra (1D and 2D)</b>                                                                                                                                                                                                                        | S32-S64 |

## General Procedures

(*R*)-(-)-3-Hydroxy-4,4,4-trichlorobutyric  $\beta$ -lactone (**7**) was purchased from Aldrich and used as received. Hex-5-yn-1-amine (**6**) was synthesized according to the procedure described by Ravoo and Reinhoudt.<sup>1</sup> All other natural products were either commercially available or obtained from collaborators. All non-aqueous reactions were performed under a nitrogen atmosphere in oven-dried glassware. Toluene, benzene, diethyl ether, acetonitrile, and methylene chloride were purified by passing through activated alumina columns. Tetrahydrofuran was freshly distilled over sodium and benzophenone. Methanol was freshly distilled from Mg turnings. Triethylamine was distilled from calcium hydride and *i*-Pr<sub>2</sub>NEt was distilled from potassium hydroxide prior to use. Yields referred to chromatographically and spectroscopically (<sup>1</sup>H NMR) homogeneous materials, unless otherwise stated. Reagents were purchased at the highest commercial quality and used without further purification, unless otherwise stated. Reactions were monitored by (high performance liquid chromatography/mass spectrometry) HPLC/MS and thin layer chromatography (TLC). LC/MS was carried out using an ion trap HPLC/MS instrument using a C-18 50 x 2.10 mm 3 micron column, eluting with gradient 5% acetonitrile 95% water to 100% acetonitrile in 15.8 min, detecting with UV 250 nm, PDA 190-400 nm and MS ion trap (ionization modes are APCI (+) and (-) or ESI (+) and (-), scan range 100-2100). Thin-layer chromatography (TLC) was carried out on 0.25 mm E. Merck silica gel plates (60F-254) using UV light for visualization and either an ethanolic solution of phosphomolybdic acid and cerium sulfate or an ethanolic solution of para-anisaldehyde with heat. Flash column chromatography was performed with 60Å Silica Gel (230-400 mesh) as stationary phase using a gradient solvent system (EtOAc/hexanes as eluent unless indicated otherwise). Preparative thin-layer chromatography (PTLC) separations were carried out on 0.25 or 0.50 mm E. Merck silica gel plates (60F-254). <sup>1</sup>H NMR chemical shifts were measured at 300 or 500 MHz and referenced relative to trace amounts of chloroform ( $\delta$  7.26) and were reported in parts per million ( $\delta$ , ppm). Coupling constants (*J*) were reported in Hertz (Hz), with multiplicity reported following usual convention: s, singlet; d, doublet; t,

---

<sup>1</sup> Dorota I. Rozkiewicz, Dominik Jan'czewski, Willem Verboom, Bart Jan Ravoo, and David N. Reinhoudt *Angew. Chem. Int. Ed.* **2006**, *45*, 5292-5296.

triplet; q, quadruplet; dd, doublet of doublets; ddd, doublet of doublet of doublets; dddd, doublet of doublet of doublet of doublets; dt, doublet of triplets; dq, doublet of quartets; m, multiplet; br s, broad singlet.  $^{13}\text{C}$  NMR spectra were measured at 75 MHz or 125 MHz and referenced relative to residual chloroform ( $\delta$  77.16) and were reported in ppm. High resolution mass spectra (HRMS) were obtained through the Center for Chemical Characterization and Analysis (Texas A&M University) using MALDI (matrix-assisted laser-desorption ionization) or ESI (electrospray ionization).

**Table S1: CH amination/azirdination optimization using gibberellic acid methyl ester (GAME) as substrate**

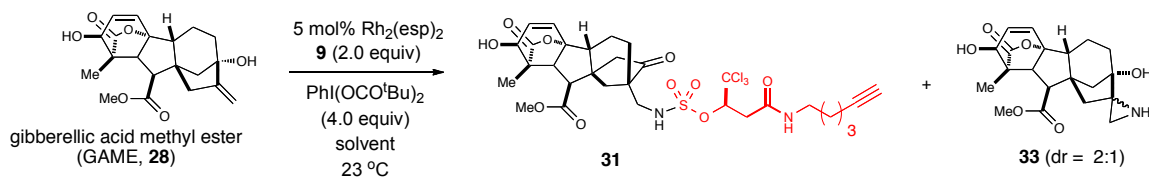

| NP form   | Nitrene (eq.) | Oxidant (eq.) | Catalyst (eq.) | Solvent (M)                                                                                 | Temp (°C) | Time (h) | Product (31) Yield | SM recovery | Comments                  |
|-----------|---------------|---------------|----------------|---------------------------------------------------------------------------------------------|-----------|----------|--------------------|-------------|---------------------------|
| Crystal   | 1.0           | 2.0           | 0.05           | Benzene 0.125 M                                                                             | 25        | 18       | 24.1%              | 61.7%       |                           |
| Crystal   | 2.0           | 4.0           | 0.05           | same                                                                                        | 25        | 18       | 27.6%              | 55.0%       |                           |
| Crystal   | 3.0           | 6.0           | 0.05           | same                                                                                        | 25        | 18       | 31.8%              | 19.4%       |                           |
| Crystal   | 2.0           | 4.0           | 0.01           | same                                                                                        | 25        | 18       | 25.1%              | 57.2%       |                           |
| Crystal   | 2.0           | 4.0           | 0.10           | same                                                                                        | 25        | 18       | 24.6%              | 48.3%       |                           |
| Crystal   | 2.0           | 4.0           | 0.05           | same                                                                                        | 40        | 18       | 25.4%              | 31.1%       |                           |
| Crystal   | 2.0           | 4.0           | 0.05           | same                                                                                        | 25        | 0.5      | 37.3%              | 51.1%       |                           |
| Crystal   | 2.0           | 4.0           | 0.10           | same                                                                                        | 25        | 0.5      | 33.1%              | 57.2%       |                           |
| Crystal   | 2.0           | 4.0           | 0.10           | same                                                                                        | 25        | 0.5      | 31.2%              | 62.2%       | on silica gel             |
| Amorphous | 2.0           | 4.0           | 0.05           | same                                                                                        | 25        | 18       | 51.1%              | 27.0%       |                           |
| Amorphous | 2.0           | 4.0           | 0.05           | same                                                                                        | 25        | 0.5      | 55.0%              | 44.4%       |                           |
| Amorphous | 2.0           | 4.0           | 0.05           | same                                                                                        | 25        | 0.5      | 34.5%              | 55.6%       | Add catalyst portion wise |
| Amorphous | 2.0           | 2.4           | 0.05           | same                                                                                        | 25        | 0.5      | 33.7%              | 65.0%       |                           |
| Amorphous | 2.0           | 4.0           | 0.05           | $\text{CH}_2\text{Cl}_2$ 0.125 M                                                            | 25        | 0.5      | 29.3%              | 28.9%       | Comp. 33 40.3%            |
| Amorphous | 2.0           | 4.0           | 0.05           | Benzene 0.025 M                                                                             | 25        | 0.5      | 38.7%              | 58.3%       |                           |
| Amorphous | 2.0           | 4.0           | 0.05           | 0.125 M  | 25        | 0.5      | 6.4%               | 66.6%       | Comp. 33 22.9%            |

### Preparation of alkynyl sulfamate nitrene precursor 9.

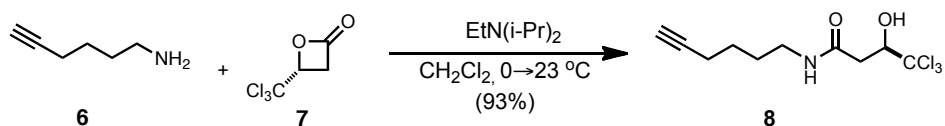

**(R)-4,4,4-trichloro-N-(hex-5-yn-1-yl)-3-hydroxybutanamide (8).** *N,N'*-diisopropylethyl amine (1.56 ml, 9 mmol) was added to a solution of (*R*)-(-)-3-Hydroxy-4,4,4-trichlorobutyric  $\beta$ -lactone (2.5 g, 13.5 mmol) in  $\text{CH}_2\text{Cl}_2$  (30 mL) and cooled to 0 °C. A solution of hex-5-yn-1-amine (0.87 g, 9 mmol) in  $\text{CH}_2\text{Cl}_2$  (10 mL) was added dropwise to the above solution at 0 °C. The reaction mixture was stirred at 0 °C for 1 h, then at ambient temperature (23 °C) for an additional 1 h. After the reaction was judged complete by TLC, the solvent was removed by evaporation and the residue was purified by flash column chromatography (EtOAc/hexane: 20-40%) to give amide **8** (2.4 g, 8.4 mmol, 93% yield) as a colorless oil.  $^1\text{H}$  NMR (300 MHz,  $\text{CDCl}_3$ ):  $\delta$  6.42 (t,  $J = 5.4$  Hz, 1H), 5.48 (br s, 1H), 4.54 (d,  $J = 9.3$  Hz, 1H), 3.26 (ddd,  $J = 12.9, 6.9, 2.4$  Hz, 2H), 2.92 (dd,  $J = 15.0, 2.4$  Hz, 1H), 2.56 (dd,  $J = 14.7, 9.3$  Hz, 1H), 2.19 (dt,  $J = 6.6, 2.7$  Hz, 2H), 1.95 (t,  $J = 2.4$  Hz, 1H), 1.65-1.50 (m, 4H);  $^{13}\text{C}$  NMR (125 MHz,  $\text{CDCl}_3$ ):  $\delta$  170.0, 102.3, 83.9, 79.7, 68.9, 39.2, 37.8, 28.3, 25.5, 18.0; HRMS (ESI+):  $m/z$  calcd. for  $\text{C}_{10}\text{H}_{15}\text{Cl}_3\text{NO}_2$  [M+H] 286.0168, found 286.0173.

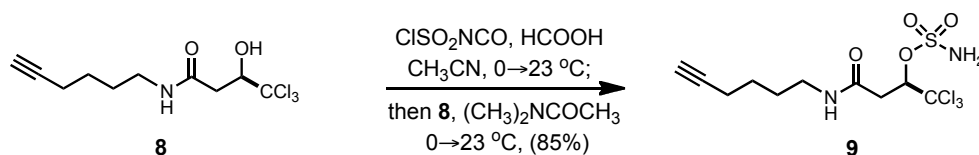

**(R)-1,1,1-trichloro-4-(hex-5-yn-1-ylamino)-4-oxobutan-2-yl sulfamate (9).** A solution of  $\text{HCO}_2\text{H}$  (0.35 mL, 9.2 mmol) in  $\text{CH}_3\text{CN}$  (3 mL) was added to a solution of  $\text{ClSO}_2\text{NCO}$  (0.8 mL, 9.2 mmol) in  $\text{CH}_3\text{CN}$  (5 mL) over 10 min and the mixture was stirred at ambient temperature (23 °C) for 8 h. A solution of alcohol **8** (1.32 g, 4.6 mmol) in dimethylacetamide (DMA, 6 mL) was then added to the reaction mixture at 0 °C and the resulting solution was stirred at 23 °C for 2 h. Upon completion of the reaction, it was quenched with water (20 mL) and extracted with  $\text{Et}_2\text{O}$  (50 mL). The separated aqueous layer was extracted with  $\text{Et}_2\text{O}$  (2 x 100 mL) and the combined organic layers were washed with water (5 x 50 mL), dried over  $\text{MgSO}_4$ , and concentrated. The residue was purified by flash column chromatography (EtOAc/hexane: 20-40%) to give sulfamate **9** (1.4 g, 3.9 mmol, 90% yield) as a colorless solid.  $^1\text{H}$  NMR (500 MHz,  $\text{CDCl}_3$ )  $\delta$  5.97 (br s, 1H), 5.74 (s, 2H), 5.51 (dd,  $J = 8.5, 2.0$  Hz, 1H), 3.32 (dd,  $J = 13.0, 7.0$  Hz, 2H), 3.17 (dd,  $J = 16.5, 2.0$  Hz, 1H), 2.92 (dd,  $J = 16.5, 9.0$  Hz, 1H), 2.24 (dt,  $J = 7.0, 2.5$  Hz, 2H),

1.98 (t,  $J = 2.5$  Hz, 1H), 1.69-1.63 (m, 2H), 1.59-1.53 (m, 2H);  $^{13}\text{C}$  NMR (125 MHz,  $\text{CDCl}_3$ )  $\delta$  169.0, 98.5, 85.9, 84.0, 69.2, 39.7, 38.2, 28.4, 25.6, 18.1; HRMS (ESI+):  $m/z$  calcd. for  $\text{C}_{10}\text{H}_{16}\text{Cl}_3\text{N}_2\text{O}_4\text{S}$   $[\text{M}+\text{H}]$  364.9896, found 364.9890.

**General procedure for the survey of catalysts for C-H amination versus aziridination of (*S*)-carvone.**

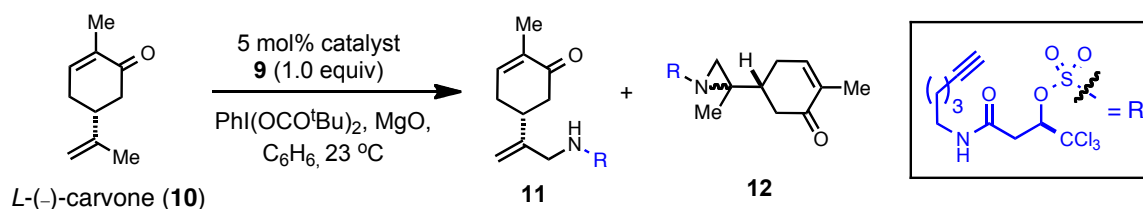

Sulfamate **9** (36.5 mg, 0.1 mmol),  $\text{Rh}_2(\text{esp})_2$  (3.5 mg, 0.005 mmol), and MgO (10 mg, 0.25 mmol) were mixed in benzene (0.4 mL) and (-)-carvone (16 mL, 0.1 mmol) was added in one portion. The resulting mixture was stirred at 23 °C for 30 min to give a homogeneous suspension. A solution of  $\text{PhI}(\text{O}_2\text{C}^t\text{Bu})_2$  (81 mg, 0.20 mmol) in benzene (0.8 mL) was slowly added to the reaction mixture via syringe pump over 4 h. Upon complete addition, the mixture was stirred at 23 °C for 10 h. The suspension was filtered through a short pad of Celite and the filtrate was concentrated. The residue was purified by flash column chromatography (EtOAc/hexane, 20-45%) to give CH amination product **11** (5.1 mg, 0.01 mmol, 10% yield) and aziridine **12** (8.2 mg, 0.016 mmol, 16% yield, dr = 1.4:1), both isolated as colorless oils.

**(*R*)-1,1,1-trichloro-4-(hex-5-yn-1-ylamino)-4-oxobutan-2-yl (2-((*R*)-4-methyl-5-oxocyclohex-3-en-1-yl)allyl)sulfamate **11** (10% yield).**

$^1\text{H}$  NMR (500 MHz,  $\text{CDCl}_3$ )  $\delta$  6.74 (br s, 1H), 5.87 (t,  $J = 5.0$  Hz, 1H), 5.75 (br s, 1H), 5.48 (dd,  $J = 8.0, 2.0$  Hz, 1H), 5.14 (s, 1H), 5.00 (s, 1H), 3.88 (dd,  $J = 14.5, 7.5$  Hz, 1H), 3.63 (dd,  $J = 14.5, 4.5$  Hz, 1H), 3.39-3.34 (m, 1H), 3.26-3.20 (m, 1H), 3.15 (dd,  $J = 16.5, 2.0$  Hz, 1H), 2.89-2.84 (m, 2H), 2.62-2.55 (m, 2H), 2.40 (dd,  $J = 15.5, 12.5$  Hz, 1H), 2.29-2.25 (m, 1H), 2.24 (dt,  $J = 7.0, 2.5$  Hz, 2H), 1.98 (t,  $J = 2.5$  Hz, 1H), 1.79 (s, 3H), 1.69-1.62 (m, 2H), 1.62-1.54 (m, 2H);  $^{13}\text{C}$  NMR (125 MHz,  $\text{CDCl}_3$ )  $\delta$  199.2, 168.6,

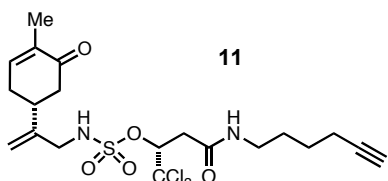

145.9, 144.3, 135.8, 113.5, 98.7, 85.5, 83.9, 69.2, 47.9, 43.0, 39.8, 38.3, 31.5, 29.9, 28.5, 25.7, 18.2, 15.8; HRMS (ESI+):  $m/z$  calcd. for  $C_{20}H_{28}Cl_3N_2OS$  [M+H] 513.0785, found 513.0795.

**(R)-1,1,1-trichloro-4-(hex-5-yn-1-ylamino)-4-oxobutan-2-yl 2-methyl-2-((R)-4-methyl-5-oxocyclohex-3-en-1-yl)aziridine-1-sulfonate 12 (dr = 1.4:1, 16% yield).**

Major diastereomer:  $^1H$  NMR (500 MHz,  $CDCl_3$ )  $\delta$  6.78 (d,  $J = 5.0$  Hz, 1H), 5.79 (t,  $J =$

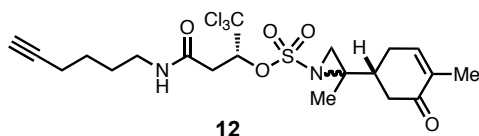

5.0 Hz, 1H), 5.57 (br s, 2H), 3.39-3.31 (m, 1H), 3.19-3.14 (m, 1H), 3.09 (dd,  $J = 16.0, 4.0$  Hz, 1H), 2.85 (dd,  $J = 16.0, 5.5$  Hz, 1H), 2.70 (s, 1H), 2.53-2.49 (m, 1H), 2.44 (s, 1H), 2.37-2.31 (m,

2H), 2.25-2.20 (m, 1H), 2.21 (dt,  $J = 6.5, 2.5$  Hz, 2H), 1.96 (t,  $J = 2.5$  Hz, 1H), 1.77 (t,  $J = 1.5$  Hz, 3H), 1.68-1.61 (m, 2H), 1.65 (s, 3H), 1.59-1.51 (m, 2H);  $^{13}C$  NMR (125 MHz,  $CDCl_3$ )  $\delta$  198.3, 167.1, 144.5, 135.6, 98.4, 86.3, 84.1, 69.0, 51.1, 43.1, 41.3, 40.4, 39.8, 39.6, 28.6, 28.2, 25.8, 18.2, 16.4, 15.8; HRMS (ESI+):  $m/z$  calcd. for  $C_{20}H_{28}Cl_3N_2OS$  [M+H] 513.0785, found 513.0788.

**Representative procedure for CH amination, aziridination, and N-amination of complex natural products.**

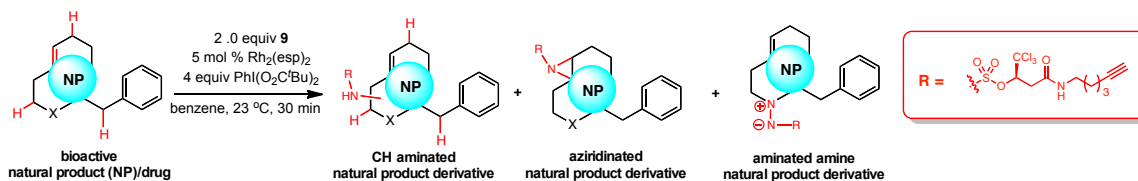

The natural product or drug (0.05 mmol, 1.0 equiv), sulfamate **9** (0.1 mmol, 2.0 equiv), and  $Rh_2(esp)_2$  (0.0025 mmol, 0.05 equiv) were mixed in a small vial and dried under high vacuum for 10 min before being purged with  $N_2$ . Benzene (0.4 mL) was added to give a green suspension (0.125 M), which was stirred at 23 °C under  $N_2$  for 10 min.  $PhI(O_2C^tBu)_2$  (0.2 mmol, 4.0 equiv) was then added in one portion and the reaction mixture was vigorously stirred at 23 °C for 30 min. The crude reaction mixture was loaded on a silica gel column directly and purified by flash column chromatography (eluting with gradient EtOAc/hexane or MeOH/ $CH_2Cl_2$ ) to isolate the desired product(s).

Note 1: This is a general procedure for natural products or drugs available in relatively large quantity ( $> 0.05$  mmol). For sample-limited natural products, the reaction could be performed on  $\sim 1$ -5 mg scale ( $\sim 4$ -20  $\mu$ mol) using 0.2 mL of solvent (reaction concentration, 20 mM) which still gives reasonable conversion. Amounts of all other reagents were reduced accordingly. See procedure for EuPAyne performed on 5 mg below for an example. Note 2: If the natural product or drug is volatile, it should be added to the reaction vial after the 10 min evacuation process.

**(*R*)-1,1,1-trichloro-4-(hex-5-yn-1-ylamino)-4-oxobutan-2-yl ((*E*)-3,7-dimethylocta-2,6-dien-1-ylidene)sulfamate 13a (*E/Z* = 8:1, 55% yield).** Major isomer:  $^1\text{H}$  NMR (500

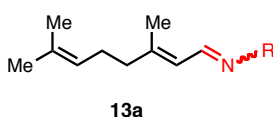

MHz,  $\text{CDCl}_3$ )  $\delta$  8.92 (d,  $J = 17.0$  Hz, 1H), 6.21 (dt,  $J = 17.0, 2.0$  Hz, 1H), 5.71 (m, 1H), 5.64 (dd,  $J = 10.5, 6.0$  Hz, 1H), 5.05 (tq,  $J = 9.5, 2.5$  Hz, 1H), 3.41-3.30 (m, 1H), 3.27-3.16 (m, 1H), 3.09 (dd,  $J = 26.5, 6.0$  Hz, 1H), 2.84 (dd,  $J = 27.0, 10.5$  Hz, 1H), 2.37-2.32 (m, 2H), 2.26-2.19 (m, 4H), 2.17 (d,  $J = 2.5$  Hz, 3H), 1.96 (t,  $J = 4.0$  Hz, 1H), 1.69 (d,  $J = 2.0$  Hz, 3H), 1.67-1.52 (m, 4H), 1.61 (d,  $J = 1.0$  Hz, 3H);  $^{13}\text{C}$  NMR (125 MHz,  $\text{CDCl}_3$ )  $\delta$  171.9, 171.3, 167.2, 133.5, 123.0, 122.2, 98.3, 86.4, 84.0, 69.0, 41.5, 39.6 (2C), 28.5, 26.0, 25.8 (2C), 19.0, 18.2, 17.9; HRMS (ESI+):  $m/z$  calcd. for  $\text{C}_{20}\text{H}_{30}\text{Cl}_3\text{N}_2\text{O}_4\text{S}$  [ $\text{M}+\text{H}$ ] 499.0992, found 499.0997.

**(*R*)-1,1,1-trichloro-4-(hex-5-yn-1-ylamino)-4-oxobutan-2-yl 3-(hydroxymethyl)-2-methyl-2-(4-methylpent-3-en-1-yl)aziridine-1-sulfonate 13b (dr = 1.2:1, 37% yield, separable diastereomers).** Major isomer:  $^1\text{H}$  NMR (500 MHz,  $\text{CDCl}_3$ )  $\delta$  5.74 (m, 1H),

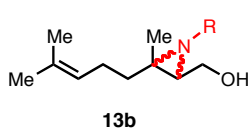

5.67 (t,  $J = 5.5$  Hz, 1H), 5.09 (t,  $J = 7.5$  Hz, 1H), 3.87 (br s, 1H), 3.79 (d,  $J = 13.0$  Hz, 1H), 3.58 (dd,  $J = 12.5, 7.5$  Hz, 1H), 3.33 (dt,  $J = 20.0, 7.0$  Hz, 1H), 3.26 (dt,  $J = 19.5, 6.0$  Hz, 1H), 3.13 (t,  $J = 2.5$  Hz, 1H), 3.11 (dd,  $J = 16.0, 4.5$  Hz, 1H), 3.02 (dd,  $J = 16.0, 6.0$  Hz, 1H), 2.26-2.22 (m, 1H), 2.23 (dt,  $J = 7.0, 3.0$  Hz, 1H), 2.17-2.10 (m, 1H), 1.97 (t,  $J = 3.0$  Hz, 1H), 1.73-1.64 (m, 3H), 1.70 (s, 3H), 1.62 (s, 3H), 1.63-1.54 (m, 3H), 1.32 (m, 3H);  $^{13}\text{C}$  NMR (125 MHz,  $\text{CDCl}_3$ )  $\delta$  168.2, 133.2, 122.6, 98.5, 85.8, 83.9, 69.1, 60.6, 56.5, 54.9, 39.7, 39.5, 36.0, 28.4, 25.8, 25.7, 25.3, 18.2, 18.1, 17.9; HRMS (ESI+):  $m/z$  calcd. for

$C_{20}H_{32}Cl_3N_2O_5S$   $[M+H]^+$  517.1098, found 517.1094. Minor isomer:  $^1H$  NMR (500 MHz,  $CDCl_3$ )  $\delta$  5.82 (dd,  $J = 5.5, 4.0$  Hz, 1H), 5.71 (t,  $J = 5.0$  Hz, 1H), 5.07 (t,  $J = 5.5$  Hz, 1H), 3.90 (ddd,  $J = 12.5, 6.5, 4.0$  Hz, 1H), 3.65 (ddd,  $J = 13.0, 8.0, 5.5$  Hz, 1H), 3.46 (t,  $J = 6.0$  Hz, 1H), 3.38-3.25 (m, 2H), 3.12 (dd,  $J = 16.0, 3.5$  Hz, 1H), 3.06 (dd,  $J = 8.0, 3.5$  Hz, 1H), 2.95 (dd,  $J = 16.5, 5.5$  Hz, 1H), 2.26-2.21 (m, 3H), 2.20-2.09 (m, 2H), 1.96 (t,  $J = 3.0$  Hz, 1H), 1.79-1.75 (m, 1H), 1.69 (s, 3H), 1.68-1.63 (m, 2H), 1.61 (s, 3H), 1.60-1.54 (m, 2H), 1.35 (m, 3H);  $^{13}C$  NMR (125 MHz,  $CDCl_3$ )  $\delta$  168.1, 133.2, 122.5, 98.4, 85.8, 84.0, 69.0, 60.5, 55.7, 55.3, 39.8, 39.5, 35.5, 28.4, 25.8, 25.7, 25.2, 18.2, 18.2, 17.9; HRMS (ESI+):  $m/z$  calcd. for  $C_{20}H_{31}Cl_3N_2O_5SNa$   $[M+Na]^+$  539.0917, found 539.0915.

**(R)-1,1,1-trichloro-4-(hex-5-yn-1-ylamino)-4-oxobutan-2-yl (2,3-dihydro-1H-inden-1-yl)sulfamate 14a** (dr = 1.5:1, 48% yield) Major diastereomer:  $^1H$  NMR (500 MHz,

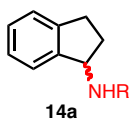

$CDCl_3$ )  $\delta$  7.47-7.45 (m, 1H), 7.26-7.19 (m, 3H), 6.00 (t,  $J = 5.5$  Hz, 1H), 5.85 (d,  $J = 9.0$  Hz, 1H), 5.57 (dt,  $J = 9.0, 1.5$  Hz, 1H), 5.09-5.02 (m, 1H), 3.21-3.10 (m, 2H), 3.04-2.80 (m, 4H), 2.66-2.58 (m, 1H), 2.16-2.12 (m, 2H), 1.93 (t,  $J = 3.0$  Hz, 1H), 1.91-1.85 (m, 1H), 1.58-1.45 (m, 4H);  $^{13}C$  NMR (125 MHz,  $CDCl_3$ )  $\delta$  168.5, 142.7, 141.5, 128.5, 127.1, 124.8, 124.5, 98.8, 85.6, 83.9, 69.0, 60.3, 39.6, 38.1, 34.2, 30.1, 28.3, 25.6, 18.1; HRMS (ESI+): calcd. for  $C_{19}H_{24}Cl_3N_2O_4S$   $[M+H]$  481.0522, found 481.0507.

**(R)-1,1,1-trichloro-4-(hex-5-yn-1-ylamino)-4-oxobutan-2-yl(oxy)sulfonyl)amino**

**substituted cinnarizine 15a** (*E/Z* = 2:1, 21% yield). Major isomer:  $^1H$  NMR (500 MHz,  $CDCl_3$ )  $\delta$  7.47-7.15 (m, 15H), 6.57 (d,  $J = 16.0$  Hz, 1H), 6.20 (dt,  $J = 9.7, 7.0$  Hz, 1H),

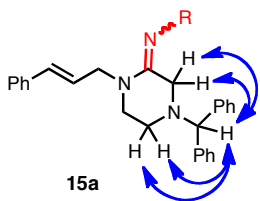

5.72 (t,  $J = 5.5$  Hz, 1H), 5.39 (t,  $J = 5.0$  Hz, 1H), 4.41 (s, 1H), 4.33 (d,  $J = 6.5$  Hz, 2H), 3.97 (d,  $J = 18.5$  Hz, 1H), 3.77 (d,  $J = 18.5$  Hz, 1H), 3.52-3.47 (m, 1H), 3.46-3.41 (m, 1H), 3.33-3.24 (m, 1H), 3.22-3.15 (m, 1H), 2.91 (dd,  $J = 15.5, 5.0$  Hz, 1H), 2.76-2.72 (m, 1H), 2.68 (dd,  $J = 15.5, 5.0$  Hz, 1H), 2.64-2.56 (m, 1H), 2.20 (dt,  $J = 7.0, 2.5$  Hz, 2H), 1.96 (t,  $J = 2.5$  Hz, 1H), 1.64-1.50 (m, 4H);  $^{13}C$  NMR (125 MHz,  $CDCl_3$ )  $\delta$  184.3, 168.0, 165.2, 140.7, 140.6, 135.9, 135.5, 129.1 (2C), 129.0 (2C), 128.8 (2C), 128.5, 127.9 (4C), 127.8, 126.8 (2C), 121.2, 99.1, 84.7, 84.3, 74.8, 68.9, 53.5, 52.4, 47.9, 46.8, 40.4, 38.6,



28.5, 25.8, 18.2; HRMS (MALDI+):  $m/z$  calcd. for  $C_{36}H_{39}Cl_3N_4O_4SNa$   $[M+Na]$  751.1649, found 751.1656. The attachment point of imine was determined by NOESY analysis.

**(*R*)-1,1,1-trichloro-4-(hex-5-yn-1-ylamino)-4-oxobutan-2-yl)oxy)sulfonyl)amino substituted  $\alpha$ -pinene 16a (dr >19:1, 21% yield).**  $^1H$  NMR (300 MHz,  $CDCl_3$ ):  $\delta$  5.73 (br s, 1H), 5.60 (d,  $J = 8.7$  Hz, 1H), 5.56 (dd,  $J = 8.1, 2.1$  Hz, 1H), 5.28 (br s, 1H), 4.19

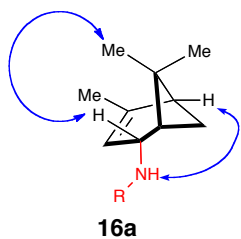

(m, 1H), 3.46-3.37 (m, 1H), 3.29-3.21 (m, 1H), 3.19 (dd,  $J = 16.8, 2.1$  Hz, 1H), 2.91 (dd,  $J = 16.5, 8.1$  Hz, 1H), 2.35 (m, 2H), 2.26 (dt,  $J = 6.6, 2.7$  Hz, 2H), 2.05 (dt,  $J = 5.4, 1.2$  Hz, 1H), 2.00 (t,  $J = 2.7$  Hz, 1H), 1.73 (t,  $J = 1.8$  Hz, 3H), 1.70-1.54 (m, 4H), 1.34 (s, 3H), 1.23 (d,  $J = 8.7$  Hz, 1H), 0.90 (s, 3H);  $^{13}C$  NMR (125 MHz,  $CDCl_3$ ):

$\delta$  168.4, 149.8, 115.8, 98.9, 85.3, 83.9, 69.1, 55.8, 47.2, 46.0, 44.6, 39.7, 38.4, 28.8, 28.5, 26.4, 25.8, 23.0, 20.6, 18.2; HRMS (ESI+):  $m/z$  calcd. for  $C_{20}H_{29}Cl_3N_2O_4SLi$   $[M+Li]$  505.1074, found 505.1061. The stereochemistry of the single diastereomer obtained was determined by NOESY analysis.

**(*R*)-1,1,1-trichloro-4-(hex-5-yn-1-ylamino)-4-oxobutan-2-yl)oxy)sulfonyl)amino substituted  $\beta$ -estrone 3-methyl ether 17a (dr = 4:1, 40% yield).** Major isomer:  $^1H$  NMR (500 MHz,  $CDCl_3$ ):  $\delta$  7.24 (d,  $J = 9.0$  Hz, 1H), 7.01 (d,  $J = 2.5$  Hz, 1H), 6.86 (dd,  $J = 8.5, 2.5$  Hz, 1H), 5.82 (d,  $J = 7.5$  Hz, 1H), 5.73 (t,  $J = 5.5$  Hz, 1H), 5.55 (dd,  $J = 8.0,$

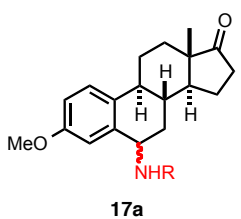

2.5 Hz, 1H), 4.85 (t,  $J = 5.0$  Hz, 1H), 3.81 (s, 3H), 3.32-3.21 (m, 2H), 3.10 (dd,  $J = 16, 2.5$  Hz, 1H), 2.85 (dd,  $J = 16, 8.0$  Hz, 1H), 2.52-2.39 (m, 3H), 2.22-2.12 (m, 4H), 2.09-2.02 (m, 1H), 1.98-1.96 (m, 1H), 1.94 (t,  $J = 2.5$  Hz, 1H), 1.82-1.76 (m, 1H), 1.70-1.49 (m, 9H), 0.92 (s, 3H);  $^{13}C$  NMR (125 MHz,  $CDCl_3$ ):  $\delta$  220.4, 167.9,

158.4, 135.4, 132.4, 126.7, 115.4, 114.5, 98.9, 85.9, 84.0, 69.1, 55.6, 53.4, 50.0, 48.2, 44.0, 39.7, 39.0, 36.0, 33.3 (2C), 31.6, 28.4, 25.7, 25.7, 21.6, 18.2, 14.1; HRMS (ESI-):  $m/z$  calcd. for  $C_{29}H_{36}Cl_3N_2O_6S$   $[M-H]^-$  645.1360, found 645.1309.

**(R)-1,1,1-trichloro-4-(hex-5-yn-1-ylamino)-4-oxobutan-2-yl)oxy)sulfonyl)amino**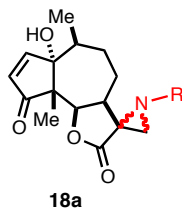

**substituted parthenin 18a (dr = 1:1, 8% yield).** One isomer:  $^1\text{H}$

NMR (500 MHz,  $\text{CD}_3\text{OD}$ )  $\delta$  7.63 (d,  $J = 5.5$  Hz, 1H), 7.14 (dd,  $J = 14.5, 0.5$  Hz, 1H), 6.59 (dd,  $J = 14.5, 0.5$  Hz, 1H), 6.17 (d,  $J = 6.0$  Hz, 1H), 5.76 (dd,  $J = 6.5, 4.0$  Hz, 1H), 5.13 (d,  $J = 6.5$  Hz, 1H), 3.46-3.39 (m, 1H), 3.26-3.20 (m, 1H), 3.18-3.16 (m, 1H), 3.14 (dd,  $J = 9.5, 5.5$

Hz, 1H), 3.12 (s, 1H), 3.01 (s, 1H), 2.97 (dd,  $J = 16.0, 6.5$  Hz, 1H), 2.37-2.29 (m, 1H), 2.26-2.19 (m, 5H), 1.70-1.60 (m, 3H), 1.58-1.51 (m, 3H), 1.35 (s, 3H), 1.14 (d,  $J = 7.5$  Hz, 3H);  $^{13}\text{C}$  NMR (125 MHz,  $\text{CD}_3\text{OD}$ )  $\delta$  213.0, 172.5, 169.3, 166.2, 143.9, 131.9, 125.6, 99.3, 88.6, 85.0, 81.5, 69.7, 60.1, 42.8, 41.4, 40.4, 39.6, 38.2, 31.9, 29.2, 27.0, 25.5, 19.8, 18.7, 18.0; HRMS (MALDI+):  $m/z$  calcd. for  $\text{C}_{25}\text{H}_{31}\text{Cl}_3\text{N}_2\text{O}_8\text{SNa}$  [ $\text{M}+\text{Na}$ ] 647.0757, found 647.0748.

**CH amination of eupalmerolide:**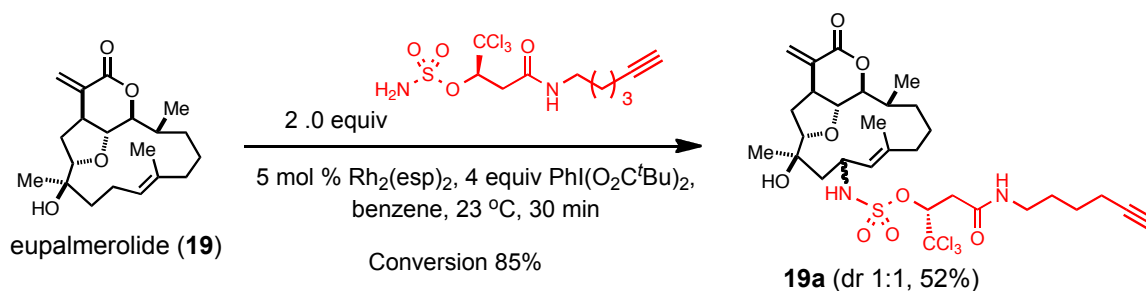**(R)-1,1,1-trichloro-4-(hex-5-yn-1-ylamino)-4-oxobutan-2-yl)oxy)sulfonyl)amino**

**substituted eupalmerolide (19a):** Eupalmerolide (1.3 mg, 3.9  $\mu\text{mol}$ , 1.0 equiv), sulfamate **9** (2.8 mg, 7.8  $\mu\text{mol}$ , 2.0 equiv) were mixed in a small vial and dried under high vacuum for 10 min before being purged with  $\text{N}_2$ .  $\text{Rh}_2(\text{esp})_2$  (1.9 mg) was mixed with 2 mL of Benzene and 0.2 mL of such suspension (containing catalyst 0.15 mg, 0.19  $\mu\text{mol}$ , 0.05 equiv) was added to the reaction mixture to give a green suspension (0.02 M), which was stirred at 23 °C under  $\text{N}_2$  for 10 min.  $\text{PhI}(\text{O}_2\text{C}^t\text{Bu})_2$  (6.3 mg, 15.6  $\mu\text{mol}$ , 4.0 equiv) was then added in one portion and the reaction mixture was vigorously stirred at 23 °C for 30 min. The crude reaction mixture was loaded on a silica gel column directly and purified by flash column chromatography eluting with gradient EtOAc/hexane to

isolate the desired product **19a** as colorless oil (1.4 mg, 52% yield, d.r. = 1:1) and unreacted eupalmerolide was also recovered as colorless oil (0.2 mg, 15%).

One diastereomer of undetermined relative stereochemistry could be isolated pure:  $^1\text{H}$  NMR (500 MHz,  $\text{CDCl}_3$ )  $\delta$  6.45 (s, 1H), 6.17 (br s, 1H), 5.60 (br s, 1H), 5.50 (s, 1H), 5.48 (dd,  $J = 8.5, 3.0$  Hz, 1H), 5.30-5.26 (m, 1H), 4.60-4.55 (m, 1H), 4.36 (dd,  $J = 10.0, 5.5$  Hz, 1H), 4.00 (dd,  $J = 10.0, 4.0$  Hz, 1H), 3.87 (dd,  $J = 12.0, 5.5$  Hz, 1H), 3.37 (dd,  $J = 13.0, 6.5$  Hz, 1H), 3.28 (dd,  $J = 13.0, 6.5$  Hz, 1H), 3.05 (dd,  $J = 13.0, 2.0$  Hz, 1H), 2.77 (dd,  $J = 16.5, 7.0$  Hz, 1H), 2.79-2.74 (m, 1H), 2.27-2.23 (m, 1H), 2.24 (dt,  $J = 7.0, 1.5$  Hz, 2H), 2.17-2.13 (m, 1H), 2.10-2.01 (m, 2H), 1.98 (t,  $J = 1.5$  Hz, 1H), 1.94-1.88 (m, 2H), 1.83-1.80 (m, 1H), 1.75-1.72 (m, 1H), 1.70-1.64 (m, 2H), 1.65 (s, 3H), 1.59-1.51 (m, 2H), 1.31 (s, 3H), 1.35-1.25 (m, 2H), 1.10 (d,  $J = 6.0$  Hz, 3H), 0.89-0.85 (m, 1H); HRMS (MALDI<sup>+</sup>):  $m/z$  calcd. for  $\text{C}_{30}\text{H}_{43}\text{Cl}_3\text{N}_2\text{O}_8\text{SNa}$   $[\text{M}+\text{Na}]$  719.1697, found 719.1680. The attachment point of the sulfamate side chain was determined by COSY analysis (*vide infra*).

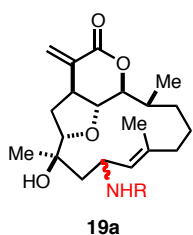

### CH amination of EuPA:

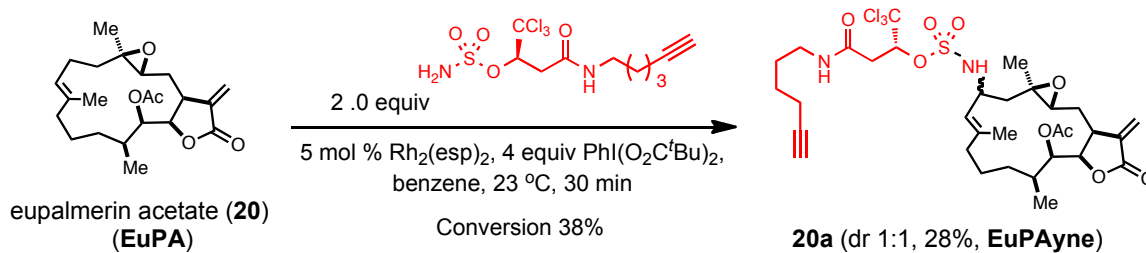

### (*R*)-1,1,1-trichloro-4-(hex-5-yn-1-ylamino)-4-oxobutan-2-yl)oxy)sulfonyl)amino

**substituted substituted eupalmerin (EuPAyne, 20a):** EuPA (5.0 mg, 13.3  $\mu\text{mol}$ , 1.0 equiv), sulfamate **9** (9.7 mg, 26.6  $\mu\text{mol}$ , 2.0 equiv), and  $\text{Rh}_2(\text{esp})_2$  (0.5 mg, 0.66  $\mu\text{mol}$ , 0.05 equiv) were mixed in a small vial and dried under high vacuum for 10 min before being purged with  $\text{N}_2$ . 0.4 mL of Benzene was added to the reaction mixture to give a green suspension (0.03 M), which was stirred at 23 °C under  $\text{N}_2$  for 10 min.  $\text{PhI}(\text{O}_2\text{C}^t\text{Bu})_2$  (21.6 mg, 53.2  $\mu\text{mol}$ , 4.0 equiv) was then added in one portion and the reaction mixture was vigorously stirred at 23 °C for 45 min. The crude reaction mixture was loaded on a

silica gel column directly and purified by flash column chromatography eluting with gradient EtOAc/hexane to isolate the desired product **20a** as light yellow oil (2.7 mg, 28% yield, d.r. = 1:1) and un-reacted eupalmerolide was also recovered as light yellow oil (3.1 mg, 62%).

One isomer:  $^1\text{H NMR}$  (500 MHz,  $\text{CDCl}_3$ )  $\delta$  6.09 (d,  $J = 3.0$  Hz, 1H), 5.70 (br s, 1H), 5.50

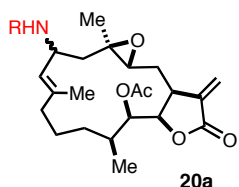

(br s, 1H), 5.44 (dd,  $J = 8.0, 2.5$  Hz, 1H), 5.29 (d,  $J = 3.5$  Hz, 1H), 5.16 (d,  $J = 10.0$  Hz, 1H), 5.04 (d,  $J = 9.0$  Hz, 1H), 4.86 (d,  $J = 7.5$  Hz, 1H), 4.55-4.47 (m, 1H), 3.36-3.28 (m, 3H), 3.10 (dd,  $J = 16.0, 2.0$  Hz, 1H), 2.84 (dd,  $J = 16.5, 8.0$  Hz, 1H), 2.81 (d,  $J = 5.0$  Hz,

1H), 2.47 (dd,  $J = 13.0, 4.0$  Hz, 1H), 2.24 (dt,  $J = 7.0, 3.0$  Hz, 2H), 2.21-2.16 (m, 2H), 2.03-1.98 (m, 1H), 1.97 (t,  $J = 3.0$  Hz, 1H), 1.89 (s, 3H), 1.89-1.84 (m, 1H), 1.79-1.75 (m, 1H), 1.77 (s, 3H), 1.69-1.65 (m, 3H), 1.59-1.55 (m, 2H), 1.49-1.44 (m, 1H), 1.38 (s, 3H), 1.33-1.25 (m, 3H), 0.81 (d,  $J = 7.0$  Hz, 3H); HRMS (MALDI+):  $m/z$  calcd. for  $\text{C}_{32}\text{H}_{45}\text{Cl}_3\text{N}_2\text{O}_9\text{SNa}$   $[\text{M}+\text{Na}]$  761.1803, found 761.1838. The attachment point of sulfamate side chain was determined by COSY analysis (*vide infra*).

**(R)-1,1,1-trichloro-4-(hex-5-yn-1-ylamino)-4-oxobutan-2-yl**      **(((R)-5-((S)-4,5-dimethoxy-3-oxo-1,3-dihydroisobenzofuran-1-yl)-4-methoxy-**

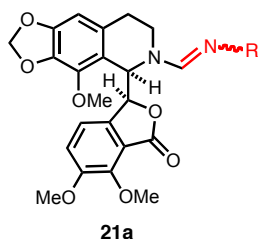

**7,8-dihydro-[1,3]dioxolo[4,5-g]isoquinolin-6(5H)-yl)methylene)sulfamate 21a (unseparable mixture,  $E/Z = 1.3:1$ , 21% yield).** Major isomer:  $^1\text{H NMR}$  (500 MHz,  $\text{CDCl}_3$ )  $\delta$  8.36 (s, 1H), 7.06 (d,  $J = 8.5$  Hz, 1H), 6.39 (s, 1H), 6.38 (t,  $J = 5.5$  Hz,

1H), 6.31 (d,  $J = 8.5$  Hz, 1H), 6.00 (dd,  $J = 4.5, 1.5$  Hz, 2H), 5.96 (d,  $J = 4.5$  Hz, 1H), 5.48 (dd,  $J = 6.0, 3.5$  Hz, 1H), 5.30 (d,  $J = 4.5$  Hz, 1H), 4.08 (s, 6H), 4.12-4.00 (m, 1H), 3.88 (s, 3H), 3.42-3.36 (m, 1H), 3.33-3.26 (m, 1H), 3.06 (dd,  $J = 16.0, 4.0$  Hz, 1H), 2.89 (dd,  $J = 16.0, 6.0$  Hz, 1H), 2.78-2.71 (m, 1H), 2.59-2.54 (m, 1H), 2.34-2.28 (m, 1H), 2.23 (dt,  $J = 6.5, 2.5$  Hz, 2H), 1.94 (t,  $J = 2.5$  Hz, 1H), 1.72-1.66 (m, 2H), 1.62-1.57 (m, 2H);  $^{13}\text{C NMR}$  (125 MHz,  $\text{CDCl}_3$ )  $\delta$  167.9, 166.9, 162.0, 153.1, 150.0, 148.8, 139.5, 137.9, 134.4, 128.8, 118.9, 118.1, 117.9, 112.6, 102.9, 101.3, 98.9, 84.8, 84.2, 78.5, 68.6, 62.7, 59.8, 59.2, 56.8, 40.1, 39.5, 39.4, 28.4, 26.7, 25.7, 18.1; HRMS (MALDI+):  $m/z$  calcd. for  $\text{C}_{32}\text{H}_{34}\text{Cl}_3\text{N}_3\text{O}_{11}\text{SNa}$   $[\text{M}+\text{Na}]$  796.0871, found 796.0836; Minor isomer:  $^1\text{H NMR}$

(500 MHz, CDCl<sub>3</sub>) δ 8.29 (s, 1H), 7.13 (d, *J* = 8.0 Hz, 1H), 6.72 (d, *J* = 8.5 Hz, 1H), 6.36 (s, 1H), 6.15 (d, *J* = 3.5 Hz, 1H), 6.07 (t, *J* = 5.5 Hz, 1H), 5.94 (d, *J* = 3.0 Hz, 1H), 5.92 (dd, *J* = 6.0, 1.5 Hz, 2H), 5.64 (t, *J* = 4.5 Hz, 1H), 4.04 (s, 3H), 3.89 (s, 3H), 3.81 (s, 3H), 3.44-3.40 (m, 1H), 3.34-3.30 (m, 1H), 3.18-3.13 (m, 1H), 3.16-3.13 (m, 1H), 3.10 (dd, *J* = 6.5, 5.0 Hz, 2H), 2.93-2.88 (m, 1H), 2.84-2.79 (m, 1H), 2.18 (dt, *J* = 7.0, 2.5 Hz, 2H), 1.87 (t, *J* = 2.5 Hz, 1H), 1.62-1.57 (m, 2H), 1.54-1.49 (m, 2H); <sup>13</sup>C NMR (125 MHz, CDCl<sub>3</sub>) δ 167.9, 167.1, 161.6, 152.8, 149.6, 148.2, 139.7, 139.1, 134.1, 129.3, 119.0, 118.4, 118.1, 112.3, 102.6, 101.1, 98.7, 85.4, 84.0, 79.5, 68.6, 62.3, 59.3, 56.8, 53.2, 46.8, 39.6, 39.1, 28.5, 28.4, 25.6, 18.0.

**(*R*)-((*S*)-6,7-dimethoxy-3-((*R*)-4-methoxy-6-methyl-5,6,7,8-tetrahydro-[1,3]dioxolo[4,5-*g*]isoquinolin-5-yl)isobenzofuran-1(3*H*)-one-1-ium-1-yl)(((1,1,1-trichloro-4-(hex-5-yn-1-ylamino)-4-oxobutan-2-yl)oxy)sulfonyl)amide 21b (37%**

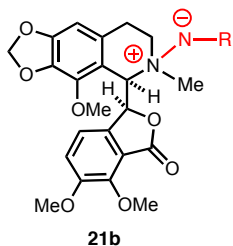

**yield).** <sup>1</sup>H NMR (500 MHz, CDCl<sub>3</sub>) δ 7.59 (d, *J* = 8.5 Hz, 1H), 7.30 (d, *J* = 8.5 Hz, 1H), 6.90 (s, 1H), 6.34 (s, 1H), 6.17 (br s, 1H), 5.97 (d, *J* = 1.5 Hz, 1H), 5.84 (d, *J* = 1.0 Hz, 1H), 5.81 (d, *J* = 1.0 Hz, 1H), 5.43 (t, *J* = 4.5 Hz, 1H), 4.15-4.07 (m, 1H), 3.98 (s, 3H), 3.91 (s, 3H), 3.84-3.78 (m, 1H), 3.45 (s, 3H), 3.39-3.30 (m, 3H), 3.20 (s, 3H), 3.11-3.01 (m, 3H), 2.22 (dt, *J* = 7.0, 2.5 Hz, 2H), 1.95 (t, *J* = 2.5 Hz, 1H), 1.69-1.57 (m, 4H); <sup>13</sup>C NMR (125 MHz, CDCl<sub>3</sub>) δ 168.4, 166.8, 152.6, 150.5, 147.6, 139.7, 139.5, 133.6, 126.3, 119.5, 119.2, 117.6, 109.2, 102.1, 101.2, 99.6, 84.2 (2C), 75.6, 71.6, 68.6, 62.2, 60.3, 58.4, 57.0, 51.6, 40.5, 39.4, 28.4, 25.7, 25.4, 18.1; HRMS (MALDI<sup>+</sup>): *m/z* calcd. for C<sub>32</sub>H<sub>36</sub>Cl<sub>3</sub>N<sub>3</sub>O<sub>11</sub>SNa [M+Na] 798.1027, found 798.1020.

**(R)-1,1,1-trichloro-4-(hex-5-yn-1-ylamino)-4-oxobutan-2-yl** **(((4bS,8aS,9S)-3-methoxy-6,7,8,8a,9,10-hexahydro-5H-9,4b-(epiminoethano)phenanthren-11-yl)methylene)sulfamate 22a** (*E/Z* = 2:1, 27% yield). Major isomer: <sup>1</sup>H NMR (500 MHz, CDCl<sub>3</sub>) δ 8.20 (s, 1H), 7.04 (dd, *J* = 5.0, 2.5 Hz, 1H), 6.84 (t, *J* = 3.0 Hz, 1H), 6.76

(dd, *J* = 8.5, 2.5 Hz, 1H), 5.70 (t, *J* = 5.5 Hz, 1H), 5.37 (t, *J* = 5.0 Hz, 1H), 4.22 (dd, *J* = 13.5, 4.5 Hz, 1H), 3.80 (s, 3H), 3.76 (t, *J* = 4.5 Hz, 1H), 3.33-3.28 (m, 1H), 3.23 (dd, *J* = 18.5, 6.5 Hz, 1H), 3.12-3.07 (m, 1H), 3.01 (dd, *J* = 16.0, 4.5 Hz, 1H), 2.91 (d, *J* = 17.0 Hz, 1H), 2.88 (dd, *J* = 16.0, 4.5 Hz, 1H), 2.63 (dt, *J* = 13.5, 4.0 Hz, 1H), 2.40 (d, *J* = 13.0 Hz, 1H), 2.18 (dt, *J* = 7.0, 2.5 Hz, 2H), 1.94 (t, *J* = 2.5 Hz, 1H), 1.83 (dt, *J* = 12.5, 3.5 Hz, 1H), 1.71-1.67 (m, 1H), 1.65-1.56 (m, 5H), 1.52-1.47 (m, 5H), 1.40-1.33 (m, 1H), 1.12 (dd, *J* = 12.5, 3.5 Hz, 1H); <sup>13</sup>C NMR (125 MHz, CDCl<sub>3</sub>) δ 167.9, 159.2, 159.1, 139.7, 129.3, 126.7, 112.0, 111.6, 99.1, 84.4, 84.1, 68.9, 60.0, 55.4, 44.6, 40.7, 40.0, 39.4, 39.3, 38.2, 36.2, 31.5, 28.5, 26.2, 26.1, 25.8, 21.9, 18.2; HRMS (MALDI+): *m/z* calcd. for C<sub>28</sub>H<sub>37</sub>Cl<sub>3</sub>N<sub>3</sub>O<sub>5</sub>S [M+H] 632.1513, found 632.1505.

**(R)-((4bS,8aS,9S)-3-methoxy-11-methyl-6,7,8,8a,9,10-hexahydro-5H-9,4b-(epiminoethano)phenanthrene-1-ium-1-yl)(((1,1,1-trichloro-4-(hex-5-yn-1-ylamino)-4-oxobutan-2-yl)oxy)sulfonyl)amide 22b** (42% yield). <sup>1</sup>H NMR (500 MHz, CDCl<sub>3</sub>) δ

7.05 (d, *J* = 8.5 Hz, 1H), 6.85 (t, *J* = 3.0 Hz, 1H), 6.78 (dd, *J* = 8.0, 2.0 Hz, 1H), 6.49 (t, *J* = 5.0 Hz, 1H), 5.28 (t, *J* = 4.5 Hz, 1H), 3.98 (br s, 1H), 3.80 (s, 3H), 3.70 (dt, *J* = 12.0, 2.0 Hz, 1H), 3.56 (s, 3H), 3.34-3.27 (m, 2H), 3.23 (dd, *J* = 19.5, 6.5 Hz, 1H), 3.10 (d, *J* = 20.0 Hz, 1H), 3.05 (t, *J* = 5.0 Hz, 2H), 3.09-3.01 (m, 1H), 2.78 (dt, *J* = 13.0, 3.5 Hz, 1H), 2.55 (dt, *J* = 13.0, 3.5 Hz, 1H), 2.38 (d, *J* = 14.0 Hz, 1H), 2.23 (dt, *J* = 7.0, 2.5 Hz, 2H), 1.94 (t, *J* = 2.5 Hz, 1H), 1.71-1.64 (m, 3H), 1.63-1.50 (m, 5H), 1.45-1.37 (m, 1H), 1.31-1.26 (m, 1H), 1.02 (dq, *J* = 12.5, 4.0 Hz, 1H); <sup>13</sup>C NMR (125 MHz, CDCl<sub>3</sub>) δ 168.6, 159.5, 139.9, 128.8, 124.2, 112.1, 111.4, 99.8, 84.1 (2C), 77.2, 72.9, 68.6, 60.7, 55.3, 54.3, 41.1, 39.3, 37.3, 36.9, 36.0, 35.1, 28.4, 27.3, 26.3, 25.8, 25.7, 21.8, 18.1; HRMS (MALDI+): *m/z* calcd. for C<sub>28</sub>H<sub>39</sub>Cl<sub>3</sub>N<sub>3</sub>O<sub>5</sub>S [M+H] 634.1670, found 634.1662.

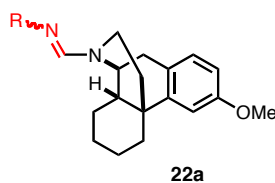

22a

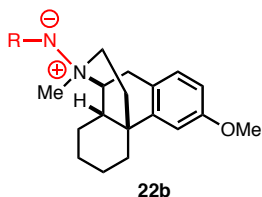

22b

**(R)-((R)-quinolin-4-yl((1S,2S,4S,5R)-5-vinylquinuclidin-2-yl)methanol-1-ium-1-yl)(((1,1,1-trichloro-4-(hex-5-yn-1-ylamino)-4-oxobutan-2-yl)oxy)sulfonyl)amide 23a (19% yield).** The material was recrystallized with EtOAc/hexanes to give colorless

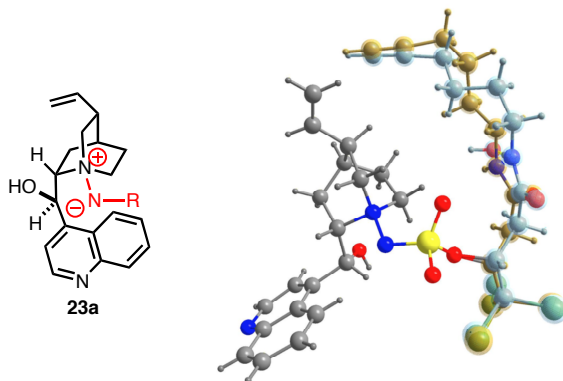

crystals, which were suitable for analysis by X-ray further confirming its structure: m.p. = 152.6 °C. <sup>1</sup>H NMR (500 MHz, CDCl<sub>3</sub>) δ 8.93 (d, *J* = 5.0 Hz, 1H), 8.29 (d, *J* = 8.5 Hz, 1H), 8.14 (d, *J* = 8.5 Hz, 1H), 7.76 (t, *J* = 7.5 Hz, 1H), 7.74 (d, *J* = 5.0 Hz, 1H), 7.65 (t, *J* = 7.5 Hz, 1H), 6.99 (br s, 1H),

6.13 (br s, 1H), 5.56 (ddd, *J* = 18.0, 11.0, 6.5 Hz, 1H), 5.42 (t, *J* = 4.5 Hz, 1H), 5.05 (d, *J* = 18.0 Hz, 1H), 5.02 (d, *J* = 11.0 Hz, 1H), 4.65-4.59 (m, 2H), 4.25-4.21 (m, 1H), 3.99 (br s, 1H), 3.70 (t, *J* = 9.0 Hz, 1H), 3.51-3.48 (m, 1H), 3.29-3.22 (m, 2H), 3.21-3.14 (m, 1H), 3.01 (dd, *J* = 15.5, 4.5 Hz, 1H), 2.82 (br s, 1H), 2.35-2.22 (m, 2H), 2.12 (t, *J* = 6.5 Hz, 2H), 2.11 (br s, 1H), 2.05-1.96 (m, 1H), 1.90 (br s, 1H), 1.62-1.55 (m, 2H), 1.51-1.45 (m, 3H); <sup>13</sup>C NMR (125 MHz, CDCl<sub>3</sub>) δ 169.2, 150.1, 148.1, 146.1, 137.0, 130.3, 129.6, 127.6, 124.7, 123.1, 118.9, 117.2, 99.8, 83.96, 83.94, 73.2, 68.7, 67.3, 64.9, 55.3, 39.9, 39.5, 39.4, 28.2, 26.5, 26.3, 25.6, 20.7, 18.0; HRMS (MALDI+): *m/z* calcd. for C<sub>29</sub>H<sub>35</sub>Cl<sub>3</sub>N<sub>4</sub>O<sub>5</sub>SNa [M+Na] 679.1285, found 679.1274.

**(R)-((R)-quinolin-4-yl((1S,2S,4S,5R)-5-vinylquinuclidin-2-yl)methanol-1-ium-1-yl)(((1,1,1-trichloro-4-(hex-5-yn-1-ylamino)-4-oxobutan-2-yl)oxy)sulfonyl)amide 23b (37% yield).** <sup>1</sup>H NMR (500 MHz, CDCl<sub>3</sub>) δ

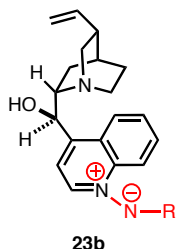

9.00 (d, *J* = 6.5 Hz, 1H), 8.92 (d, *J* = 8.5 Hz, 1H), 8.37 (d, *J* = 8.0 Hz, 1H), 7.95-7.90 (m, 2H), 7.72 (t, *J* = 7.0 Hz, 1H), 6.30 (br s, 1H), 5.81 (br s, 1H), 5.12 (ddd, *J* = 17.0, 10.5, 3.0 Hz, 1H), 5.08 (t, *J* = 4.5 Hz, 1H), 5.00 (d, *J* = 11.5 Hz, 1H), 4.98 (d, *J* = 4.5 Hz, 1H), 3.53 (br s, 1H), 3.32-3.20 (m, 2H), 3.22-3.18 (m, 1H), 3.15-3.05 (m, 1H), 2.95 (dd, *J* = 16.0, 12.0 Hz, 1H), 2.81 (dd, *J* = 15.5, 5.5 Hz, 1H), 2.78-2.70 (m, 2H), 2.40-2.35 (m, 1H), 2.21 (dt, *J* = 7.0, 2.5 Hz, 2H),

1.95 (t,  $J = 2.5$  Hz, 1H), 1.90-1.78 (m, 1H), 1.80-1.70 (m, 2H), 1.69-1.51 (m, 6H);  $^{13}\text{C}$  NMR (125 MHz,  $\text{CDCl}_3$ )  $\delta$  168.3, 156.8, 147.5, 140.4, 140.2, 133.8, 129.9, 127.4, 124.6, 122.0, 119.4, 115.7, 99.5, 84.3, 84.0, 70.8, 68.9, 61.1, 56.1, 43.4, 40.1, 39.6, 39.0, 28.4, 27.5, 26.0, 25.8, 21.4, 18.2; HRMS (MALDI+):  $m/z$  calcd. for  $\text{C}_{29}\text{H}_{36}\text{Cl}_3\text{N}_4\text{O}_5\text{S}$  [ $\text{M}+\text{H}$ ] 657.1465, found 657.1451.

**Bis-(*R*)-((*R*)-quinolin-4-yl((1*S*,2*S*,4*S*,5*R*)-5-vinylquinuclidin-2-yl)methanol-1-ium-1-yl)(((1,1-trichloro-4-(hex-5-yn-1-ylamino)-4-oxobutan-2-yl)oxy)sulfonyl)amide 23c (6% yield).**  $^1\text{H}$  NMR (500 MHz,  $\text{CDCl}_3$ )  $\delta$  9.13 (d,  $J = 6.5$  Hz, 1H), 9.03 (d,  $J = 9.5$  Hz,

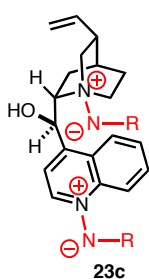

1H), 8.66 (d,  $J = 9.0$  Hz, 1H), 8.16 (d,  $J = 6.5$  Hz, 1H), 8.03 (dd,  $J = 9.5, 7.5$  Hz, 1H), 7.90 (dd,  $J = 9.0, 7.5$  Hz, 1H), 7.10 (br s, 1H), 6.26 (t,  $J = 5.0$  Hz, 1H), 6.04 (t,  $J = 5.0$  Hz, 1H), 5.75 (br s, 1H), 5.60 (ddd,  $J = 17.5, 10.5, 6.0$  Hz, 1H), 5.29 (t,  $J = 4.5$  Hz, 1H), 5.14 (t,  $J = 4.5$  Hz, 1H), 5.08 (d,  $J = 10.5$  Hz, 1H), 5.07 (d,  $J = 17.5$  Hz, 1H), 4.61-4.55 (m, 1H), 4.51 (dd,  $J = 12.5, 11.0$  Hz, 1H), 4.12-4.07 (m, 1H), 3.67-3.62 (m, 1H), 3.52-3.48 (m, 1H), 3.32-3.27 (m, 3H), 3.24-3.16 (m, 1H), 3.13 (dd,  $J = 16.0, 4.0$  Hz, 1H), 2.99 (dd,  $J = 16.0, 5.0$  Hz, 1H), 2.94 (dd,  $J = 16.0, 4.0$  Hz, 1H), 2.86-2.82 (m, 1H), 2.78 (dd,  $J = 16.0, 5.0$  Hz, 1H), 2.41-2.35 (m, 1H), 2.30-2.25 (m, 1H), 2.23 (dt,  $J = 7.0, 2.5$  Hz, 2H), 2.19 (dt,  $J = 7.0, 2.5$  Hz, 2H), 2.09 (br s, 1H), 2.02-1.98 (m, 1H), 1.97 (t,  $J = 2.0$  Hz, 1H), 1.95 (t,  $J = 2.5$  Hz, 1H), 1.70-1.52 (m, 9H);  $^{13}\text{C}$  NMR (125 MHz,  $\text{CDCl}_3$ )  $\delta$  168.83, 167.95, 154.79, 147.50, 140.32, 136.59, 134.06, 130.62, 126.85, 124.87, 121.90, 119.65, 117.54, 99.61, 99.40, 84.22, 84.01, 83.94, 83.82, 73.59, 68.86, 68.74, 67.16, 64.92, 55.95, 39.87 (2C), 39.73, 39.44, 39.41, 28.27, 28.26, 26.32, 26.19, 25.70, 25.65, 20.18, 18.07, 18.05; HRMS (ESI+):  $m/z$  calcd. for  $\text{C}_{39}\text{H}_{49}\text{Cl}_6\text{N}_6\text{O}_9\text{S}_2$  [ $\text{M}+\text{H}$ ] 1019.1128, found 1019.1115.

**(*R*)-((4*aR*,4*a1R*,5*aS*,8*aR*,8*a1S*,15*aS*)-10,11-dimethoxy-4*a1*,5,5*a*,7,8,8*a1*,15,15*a*-octahydro-2*H*-4,6-methanoindolo[3,2,1-*ij*]oxepino[2,3,4-*de*]pyrrolo[2,3-*h*]quinolin-14(4*aH*)-one-1-ium-1-yl)(((1,1-trichloro-4-(hex-5-yn-1-ylamino)-4-oxobutan-2-yl)oxy)sulfonyl)amide 24a (28% yield).**  $^1\text{H}$  NMR (500 MHz,

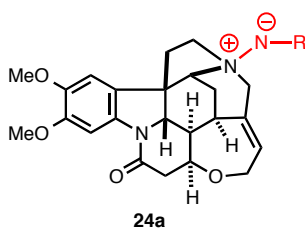

$\text{CDCl}_3$ )  $\delta$  7.78 (s, 1H), 6.89 (s, 1H), 6.35 (m, 1H), 6.20 (t,  $J = 5.5$  Hz, 1H), 5.37 (t,  $J = 4.5$  Hz, 1H), 4.80 (s, 1H), 4.65 (dd,  $J =$



= 12.5, 7.0 Hz, 1H), 4.57 (d,  $J = 13.5$  Hz, 1H), 4.34 (dt,  $J = 8.5, 2.5$  Hz, 1H), 4.29 (d,  $J = 13.5$  Hz, 1H), 4.27 (dd,  $J = 13.5, 7.0$  Hz, 1H), 4.08 (dd,  $J = 14.0, 5.5$  Hz, 1H), 3.97 (d,  $J = 10.5$  Hz, 1H), 3.90 (s, 3H), 3.89 (s, 3H), 3.72 (dt,  $J = 13.5, 5.5$  Hz, 1H), 3.33-3.28 (m, 3H), 3.14 (dd,  $J = 17.5, 8.5$  Hz, 1H), 3.05 (dd,  $J = 4.5, 1.5$  Hz, 2H), 2.82 (dt,  $J = 15.5, 4.0$  Hz, 1H), 2.67 (dd,  $J = 17.5, 2.5$  Hz, 1H), 2.59 (dt,  $J = 14.0, 7.5$  Hz, 1H), 2.22 (dt,  $J = 7.0, 2.5$  Hz, 1H), 2.04 (dd,  $J = 13.5, 5.5$  Hz, 1H), 1.94 (t,  $J = 2.5$  Hz, 1H), 1.73 (d,  $J = 15.5$  Hz, 1H), 1.69-1.63 (m, 2H), 1.61-1.55 (m, 2H), 1.39 (dt,  $J = 10.5, 2.5$  Hz, 1H);  $^{13}\text{C}$  NMR (125 MHz,  $\text{CDCl}_3$ )  $\delta$  168.5 (2C), 150.6, 147.1, 135.8, 135.7, 134.4, 119.0, 105.2, 101.2, 99.9, 84.5, 84.3, 81.4, 77.6, 68.8, 68.0, 64.3, 63.8, 59.0, 56.9, 56.4, 52.5, 47.4, 42.3, 40.7, 39.5 (2C), 30.3, 28.5, 25.9, 25.7, 18.2; HRMS (MALDI+):  $m/z$  calcd. for  $\text{C}_{33}\text{H}_{40}\text{Cl}_3\text{N}_4\text{O}_8\text{S}$  [M+H] 757.1625, found 757.1622. The stereochemistry of **16a** was determined by NOESY analysis.

**(7a*S*,15b*R*,15c*R*)-12,13-dimethoxy-7a,8,15b,15c-tetrahydro-1H-3,15-ethanopyrido[4',3':4,5']oxepino[3',2':3,4]pyrido[1,2-*a*]indole-2,9(4H,6H)-dione**

**24b (21% yield).**  $^1\text{H}$  NMR (500 MHz,  $\text{CDCl}_3$ )  $\delta$  7.94 (s, 1H), 6.84 (s, 1H), 6.08-6.06 (m, 1H), 4.63 (ddd,  $J = 13.5, 13.0, 2.5$  Hz, 1H), 4.32 (dd,  $J = 14.0, 7.0$  Hz, 1H), 4.25 (dd,  $J = 15.5, 2.0$  Hz, 1H), 4.20 (d,  $J = 6.0$  Hz, 1H), 4.16 (ddd,  $J = 14.0, 5.0, 2.0$  Hz, 1H), 3.92 (s, 3H), 3.91 (s, 3H), 3.92-3.90 (m, 1H), 3.57 (d,  $J = 6.5$  Hz, 1H), 3.36 (s, 1H), 3.23 (dd,  $J = 13.0, 2.5$  Hz, 1H), 3.23 (dd,  $J = 19.0, 6.0$  Hz, 1H), 3.24-3.20 (m, 1H), 2.92 (dd,  $J = 15.0, 6.5$  Hz, 1H), 2.88-2.82 (m, 1H), 2.83 (d,  $J = 19.0$  Hz, 1H), 2.54 (dd,  $J = 15.0, 1.5$  Hz, 1H);  $^{13}\text{C}$  NMR (125 MHz,  $\text{CDCl}_3$ )  $\delta$  174.8, 167.9, 148.1, 146.9, 145.0, 130.1, 129.5, 124.6, 123.2, 117.6, 100.4, 99.6, 83.8, 67.9, 56.3 (2C), 52.8, 49.2, 48.7, 42.3, 41.4, 39.5, 25.6; HRMS (ESI+):  $m/z$  calcd. for  $\text{C}_{23}\text{H}_{24}\text{N}_2\text{O}_5\text{Na}$  [M+Na] 431.1583, found 431.1581.

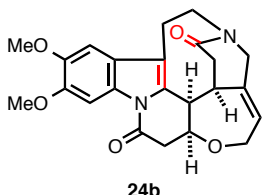

**Table S2:** NMR assignments of compound **24b**

| C  | <sup>13</sup> C<br>(ppm) | <sup>1</sup> H<br>(ppm)                                                                  |
|----|--------------------------|------------------------------------------------------------------------------------------|
| 1  | 100.42                   | 6.84 (s, 1H)                                                                             |
| 2  | 146.87                   |                                                                                          |
| 3  | 148.09                   |                                                                                          |
| 4  | 99.64                    | 7.94 (s, 1H)                                                                             |
| 5  | 129.47                   |                                                                                          |
| 6  | 124.64                   |                                                                                          |
| 7  | 117.59                   |                                                                                          |
| 8  | 130.10                   |                                                                                          |
|    |                          |                                                                                          |
| 10 | 167.94                   |                                                                                          |
| 11 | 42.25                    | 3.23 (dd, <i>J</i> = 19.0, 6.0 Hz, 1H), 2.83 (d, <i>J</i> = 19.0 Hz, 1H)                 |
| 12 | 83.75                    | 4.20 (d, <i>J</i> = 6.0 Hz, 1H)                                                          |
| 13 | 48.65                    | 3.36 (s, 1H)                                                                             |
| 14 | 41.42                    | 3.57 (d, <i>J</i> = 6.5 Hz, 1H)                                                          |
| 15 | 39.47                    | 2.92 (dd, <i>J</i> = 15.0, 6.5 Hz, 1H), 2.54 (dd, <i>J</i> = 15.0, 1.5 Hz, 1H)           |
| 16 | 174.84                   |                                                                                          |
| 17 | 25.62                    | 3.24-3.20 (m, 1H), 2.88-2.82 (m, 1H)                                                     |
| 18 | 49.23                    | 4.63 (ddd, <i>J</i> = 13.5, 13.0, 2.5 Hz, 1H),<br>3.23 (dd, <i>J</i> = 13.0, 2.5 Hz, 1H) |
|    |                          |                                                                                          |
| 20 | 52.81                    | 4.25 (dd, <i>J</i> = 15.5, 2.0 Hz, 1H), 3.92-3.90 (m, 1H)                                |
| 21 | 145.04                   |                                                                                          |
| 22 | 123.19                   | 6.08-6.06 (m, 1H)                                                                        |
| 23 | 67.91                    | 4.32 (dd, <i>J</i> = 14.0, 7.0 Hz, 1H),<br>4.16 (ddd, <i>J</i> = 14.0, 5.0, 2.0 Hz, 1H)  |
| 24 | 56.26                    | 3.91 (s, 3H)                                                                             |
| 25 | 56.30                    | 3.92 (s, 3H)                                                                             |

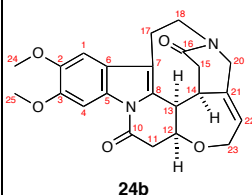

**Table S3: A comparison between inner salts of simpler model compounds (2-methylpiperidine and quinuclidine) and *N*-aminated complex natural products.**

| NMR (ppm)       | No | 1-methylpiperidine                     |                                        | (S,R)-noscapine                        |                                        | dextromethorphan                       |                                        | 22b |  |
|-----------------|----|----------------------------------------|----------------------------------------|----------------------------------------|----------------------------------------|----------------------------------------|----------------------------------------|-----|--|
|                 |    |                                        |                                        |                                        |                                        |                                        |                                        |     |  |
| <sup>1</sup> H  | a  | 2.23 <sup>A</sup>                      | 3.47 <sup>B</sup>                      | 2.53 <sup>A</sup>                      | 3.40 <sup>B</sup>                      | 2.40 <sup>A</sup>                      | 3.56 <sup>B</sup>                      |     |  |
|                 | b  | 2.32 <sup>A</sup><br>2.32 <sup>A</sup> | 3.92 <sup>B</sup><br>3.09 <sup>B</sup> | 2.58 <sup>A</sup><br>2.34 <sup>A</sup> | 4.09 <sup>B</sup><br>3.83 <sup>B</sup> | 2.45 <sup>A</sup><br>2.08 <sup>A</sup> | 3.70 <sup>B</sup><br>2.80 <sup>B</sup> |     |  |
|                 | c  | 1.57<br>1.57                           | 2.39<br>1.63                           | 2.34<br>1.98                           | 3.30<br>3.05                           | 1.75<br>1.39                           | 2.55<br>1.30                           |     |  |
|                 | d  | 2.32 <sup>A</sup><br>2.32 <sup>A</sup> | 3.92 <sup>B</sup><br>3.09 <sup>B</sup> | 4.37 <sup>A</sup>                      | 5.93 <sup>B</sup>                      | 2.82 <sup>A</sup>                      | 3.95 <sup>B</sup>                      |     |  |
|                 | e  | 1.57<br>1.57                           | 2.39<br>1.63                           | —                                      | —                                      | 1.84                                   | 3.06                                   |     |  |
| <sup>13</sup> C | a  | 46.9 <sup>A</sup>                      | 56.0 <sup>B</sup>                      | 46.1 <sup>A</sup>                      | 57.0 <sup>B</sup>                      | 42.8 <sup>A</sup>                      | 54.3 <sup>B</sup>                      |     |  |
|                 | b  | 56.7 <sup>A</sup>                      | 66.97 <sup>B</sup>                     | 49.8 <sup>A</sup>                      | 60.3 <sup>B</sup>                      | 47.4 <sup>A</sup>                      | 60.7 <sup>B</sup>                      |     |  |
|                 | c  | 26.3                                   | 20.90                                  | 27.8                                   | 25.4                                   | 41.9                                   | 36.9                                   |     |  |
|                 | d  | 56.7 <sup>A</sup>                      | 66.92 <sup>B</sup>                     | 60.7 <sup>A</sup>                      | 71.6 <sup>B</sup>                      | 58.1 <sup>A</sup>                      | 72.9 <sup>B</sup>                      |     |  |
|                 | e  | 26.3                                   | 20.78                                  | —                                      | —                                      | 45.2                                   | 37.3                                   |     |  |

  

| NMR (ppm)       | No | quinuclidine                           |                                        | cinchonidine                           |                                        | 23a                                    |                                        | brucine |  | 24a |  |
|-----------------|----|----------------------------------------|----------------------------------------|----------------------------------------|----------------------------------------|----------------------------------------|----------------------------------------|---------|--|-----|--|
|                 |    |                                        |                                        |                                        |                                        |                                        |                                        |         |  |     |  |
| <sup>1</sup> H  | a  | 2.87 <sup>A</sup><br>2.87 <sup>A</sup> | 3.87 <sup>B</sup><br>3.87 <sup>B</sup> | 2.58 <sup>A</sup><br>3.46 <sup>A</sup> | 4.17 <sup>B</sup><br>4.61 <sup>B</sup> | 3.14 <sup>A</sup><br>2.83 <sup>A</sup> | 4.65 <sup>B</sup><br>3.72 <sup>B</sup> |         |  |     |  |
|                 | b  | 1.53<br>1.53                           | 2.03<br>2.03                           | 1.73<br>1.48                           | 2.35<br>1.99                           | 1.84<br>1.84                           | 2.58<br>2.03                           |         |  |     |  |
|                 | c  | 2.87 <sup>A</sup><br>2.87 <sup>A</sup> | 3.87 <sup>B</sup><br>3.87 <sup>B</sup> | 3.03 <sup>A</sup><br>2.62 <sup>A</sup> | 4.58 <sup>B</sup><br>3.48 <sup>B</sup> | 3.83 <sup>A</sup>                      | 4.80 <sup>B</sup>                      |         |  |     |  |
|                 | d  | 1.53<br>1.53                           | 2.03<br>2.03                           | —                                      | —                                      | 2.33<br>1.43                           | 2.82<br>1.72                           |         |  |     |  |
|                 | e  | 2.87 <sup>A</sup><br>2.87 <sup>A</sup> | 3.87 <sup>B</sup><br>3.87 <sup>B</sup> | —                                      | —                                      | 2.68 <sup>A</sup><br>3.67 <sup>A</sup> | 4.29 <sup>B</sup><br>4.57 <sup>B</sup> |         |  |     |  |
|                 | f  | 1.53<br>1.53                           | 2.03<br>2.03                           | 1.73<br>1.48                           | 2.29<br>1.47                           | —                                      | —                                      |         |  |     |  |
|                 | g  | 1.73                                   | 2.16                                   | 1.78                                   | 2.04                                   | —                                      | —                                      |         |  |     |  |
| <sup>13</sup> C | a  | 47.9 <sup>A</sup>                      | 60.1 <sup>B</sup>                      | 43.3 <sup>A</sup>                      | 55.9 <sup>B</sup>                      | 52.7 <sup>A</sup>                      | 63.8 <sup>B</sup>                      |         |  |     |  |
|                 | b  | 26.8                                   | 25.7                                   | 27.8                                   | 25.7                                   | 26.8                                   | 39.5                                   |         |  |     |  |
|                 | c  | 47.9 <sup>A</sup>                      | 60.1 <sup>B</sup>                      | 57.1 <sup>A</sup>                      | 64.8 <sup>B</sup>                      | 60.4 <sup>A</sup>                      | 81.4 <sup>B</sup>                      |         |  |     |  |
|                 | d  | 26.8                                   | 25.7                                   | —                                      | —                                      | 31.6                                   | 25.7                                   |         |  |     |  |
|                 | e  | 47.9 <sup>A</sup>                      | 60.1 <sup>B</sup>                      | 60.5 <sup>A</sup>                      | 67.1 <sup>B</sup>                      | 50.2 <sup>A</sup>                      | 68.0 <sup>B</sup>                      |         |  |     |  |
|                 | f  | 26.8                                   | 25.7                                   | 21.7                                   | 20.6                                   | —                                      | —                                      |         |  |     |  |
|                 | g  | 20.9                                   | 19.6                                   | 28.0                                   | 26.5                                   | —                                      | —                                      |         |  |     |  |

**(*R*)-(1-methylpiperidine-1-ium-1-yl)(((1,1,1-trichloro-4-(hex-5-yn-1-ylamino)-4-oxobutan-2-yl)oxy)sulfonyl)amide (22% yield).** <sup>1</sup>H NMR (500 MHz, CDCl<sub>3</sub>) δ 6.41 (br s, 1H), 5.24 (t, *J* = 4.5 Hz, 1H), 3.98-3.91 (m, 2H), 3.48 (s, 3H), 3.35-3.25 (m, 2H), 3.14-3.05 (m, 2H), 3.02 (t, *J* = 4.5 Hz, 2H), 2.44-2.35 (m, 2H), 2.22 (dt, *J* = 7.0, 3.0 Hz, 2H),

1.94 (t,  $J = 3.0$  Hz, 1H), 1.83-1.80 (m, 1H), 1.71-1.56 (m, 6H), 1.49-1.43 (m, 1H);  $^{13}\text{C}$  NMR (125 MHz,  $\text{CDCl}_3$ )  $\delta$  168.5, 99.7, 84.2, 84.0, 68.6, 67.0, 66.9, 56.0, 40.9, 39.2, 28.4, 25.7, 21.5, 20.9, 20.8, 18.1; HRMS (ESI+):  $m/z$  calcd. for  $\text{C}_{16}\text{H}_{27}\text{Cl}_3\text{N}_3\text{O}_4\text{S}$   $[\text{M}+\text{H}]^+$  462.0788, found 462.0809.

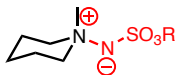

**(*R*)-quinuclidine-1-ium-1-yl(((1,1,1-trichloro-4-(hex-5-yn-1-ylamino)-4-oxobutan-2-yl)oxy)sulfonyl)amide (72% yield).**  $^1\text{H}$  NMR (500 MHz,  $\text{CDCl}_3$ )  $\delta$  6.37 (br s, 1H), 5.22 (t,  $J = 4.5$  Hz, 1H), 4.12-3.78 (m, 6H), 3.35-3.26 (m, 2H), 3.01 (ddd,  $J = 20.5$ , 16.0, 5.0 Hz, 2H), 2.21 (dt,  $J = 7.0$ , 2.5 Hz, 2H), 2.17-2.14 (m, 1H), 2.04-2.01 (m, 6H), 1.94 (t,  $J = 3.0$  Hz, 1H), 1.68-1.55 (m, 4H);  $^{13}\text{C}$  NMR (125 MHz,  $\text{CDCl}_3$ )  $\delta$  168.5, 99.7, 84.3, 84.2, 68.5, 60.1 (3C), 40.8, 39.3, 28.3, 25.7, 25.6 (3C), 19.6, 18.1; HRMS (ESI+):  $m/z$  calcd. for  $\text{C}_{17}\text{H}_{26}\text{Cl}_3\text{N}_3\text{O}_4\text{SLi}$   $[\text{M}+\text{Li}]^+$  474.0788, found 474.0774.

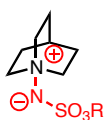

**(1*S*,2*S*,4*aR*,4*bR*,9*aS*,10*S*)-methyl 7-((*R*)-1,1,1-trichloro-4-(hex-5-yn-1-ylamino)-4-oxobutan-2-yl methylsulfamate)-2-hydroxy-1-methyl-8,13-dioxo-1,2,4*b*,5,6,7,8,9,10,10*a*-decahydro-4*a*,1-(epoxymethano)-7,9*a*-methanobenzo[ $\alpha$ ]azulene-10-carboxylate **31** (55% yield).**  $^1\text{H}$  NMR (500 MHz,  $\text{CDCl}_3$ )

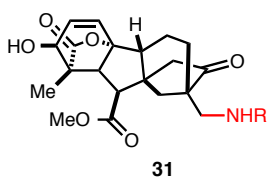

$\delta$  6.41 (d,  $J = 9.0$  Hz, 1H), 6.00 (t,  $J = 6.5$  Hz, 1H), 5.94 (dd,  $J = 9.0$ , 3.5 Hz, 1H), 5.73 (t,  $J = 5.5$  Hz, 1H), 5.46 (dd,  $J = 7.5$ , 2.5 Hz, 1H), 4.22 (dd,  $J = 7.5$ , 4.0 Hz, 1H), 3.76 (s, 3H), 3.40-3.34 (m, 1H), 3.34-3.25 (m, 2H), 3.26 (d,  $J = 7.0$  Hz, 1H), 3.17 (dd,  $J = 13.5$ , 5.5 Hz, 1H), 3.12 (dd,  $J = 16.5$ , 2.5 Hz, 1H), 2.98 (dd,  $J = 19.0$ , 3.5 Hz, 1H), 2.83 (dd,  $J = 16.5$ , 7.5 Hz, 1H), 2.74 (d,  $J = 7.0$  Hz, 1H), 2.24 (dt,  $J = 7.0$ , 2.5 Hz, 2H), 2.21-2.16 (m, 1H), 2.18 (d,  $J = 19.0$  Hz, 1H), 2.07-2.01 (m, 2H), 1.98 (t,  $J = 2.5$  Hz, 1H), 1.77 (dd,  $J = 12.0$ , 4.0 Hz, 1H), 1.73 (br s, 1H), 1.70-1.62 (m, 3H), 1.60-1.32 (m, 4H), 1.33 (s, 3H);  $^{13}\text{C}$  NMR (125 MHz,  $\text{CDCl}_3$ )  $\delta$  216.6, 178.4, 173.0, 168.2, 133.2, 131.4, 98.7, 89.3, 85.4, 84.0, 70.8, 69.1, 55.2, 54.9, 52.7, 52.6, 51.2, 50.7, 50.1, 49.8, 47.1, 43.5, 39.7, 38.8, 31.3, 28.4, 25.7, 18.8, 18.2, 14.5; HRMS (MALDI+):  $m/z$  calcd. for  $\text{C}_{30}\text{H}_{37}\text{Cl}_3\text{N}_3\text{O}_{10}\text{SNa}$   $[\text{M}+\text{Na}]$  745.1125, found 745.1135.

(1*S*,2*S*,4*aR*,4*bR*,7*S*,9*aS*,10*S*)-methyl 2,7-dihydroxy-1-methyl-13-oxo-2,4*b*,5,6,7,9,10,10*a*-octahydro-1*H*-spiro[4*a*,1-(epoxymethano)-7,9*a*-

methanobenzo[ $\alpha$ ]azulene-8,2'-aziridine]-10-carboxylate **32** (*dr* = 2:1 separable diastereomers) Major isomer: <sup>1</sup>H NMR (500 MHz, CDCl<sub>3</sub>)  $\delta$  6.19 (dd, *J* = 9.5, 1.0 Hz,

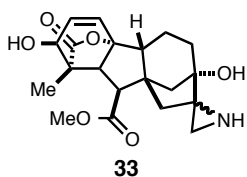

1H), 5.92 (dd, *J* = 9.5, 3.5 Hz, 1H), 4.16 (d, *J* = 1.5 Hz, 1H), 3.74 (s, 3H), 3.17 (d, *J* = 10.5 Hz, 1H), 2.93 (d, *J* = 4.5 Hz, 1H), 2.85 (d, *J* = 4.5 Hz, 1H), 2.84 (d, *J* = 6.0 Hz, 1H), 2.34 (br s, 1H), 2.27-2.20 (m, 1H), 2.14 (dd, *J* = 11.5, 2.0 Hz, 1H), 2.03 (dd, *J* = 14, 6.5 Hz, 1H),

1.98-1.93 (m, 4H), 1.77-1.65 (m, 4H), 1.25 (s, 3H); <sup>13</sup>C NMR (125 MHz, CDCl<sub>3</sub>)  $\delta$  178.3, 172.6, 132.8, 132.7, 90.4, 73.3, 70.0, 68.0, 53.7, 53.1, 52.8, 52.5, 51.7, 49.9, 49.5, 43.5, 42.7, 33.6, 17.3, 14.5; HRMS (ESI<sup>+</sup>): calcd. for C<sub>20</sub>H<sub>26</sub>NO<sub>6</sub> [M+H] 376.1760, found 376.1762. Minor isomer: <sup>1</sup>H NMR (500 MHz, CDCl<sub>3</sub>+CD<sub>3</sub>OD)  $\delta$  6.23 (d, *J* = 9.0 Hz, 1H), 5.81 (dd, *J* = 9.0, 3.5 Hz, 1H), 3.98 (d, *J* = 4.0 Hz, 1H), 3.65 (s, 3H), 3.14 (d, *J* = 10.5 Hz, 1H), 3.02 (d, *J* = 10.5 Hz, 1H), 2.65 (d, *J* = 6.5 Hz, 1H), 2.64 (d, *J* = 7.0 Hz, 1H), 2.08-2.03 (m, 2H), 1.99 (dd, *J* = 8.5, 5.0 Hz, 1H), 1.97-1.80 (m, 3H), 1.73-1.70 (m, 1H), 1.56 (dd, *J* = 13.5, 3.5 Hz, 1H), 1.37 (dd, *J* = 14, 3.5 Hz, 1H), 1.12 (s, 3H); <sup>13</sup>C NMR (125 MHz, CDCl<sub>3</sub>+CD<sub>3</sub>OD)  $\delta$  179.6, 172.8, 133.1, 131.9, 91.0, 74.9, 69.2, 67.5, 53.7, 52.8, 52.1, 52.0, 51.4, 50.9, 50.5, 44.3, 43.1, 31.6, 16.9, 14.2.

**Equilibration between compounds 11 and 25:**

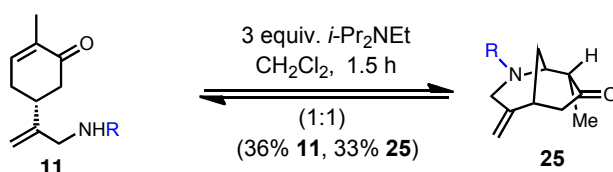

Compound **11** (6 mg, 0.012 mmol) was dissolved in CH<sub>2</sub>Cl<sub>2</sub> (1.0 mL) and *i*-Pr<sub>2</sub>NEt (4.8  $\mu$ L, 3.0 equiv.) was added. The resulting mixture was stirred at ambient temperature (23  $^{\circ}$ C) and reaction progress was followed by TLC. After 1.5 h stirring, the reaction mixture was purified directly by flash chromatography (EtOAc/Hexane 35%) to afford the starting material **11** (2.2 mg, 0.004 mmol, 36% yield) and its bridged derivative **25** (2.0 mg, 0.004 mmol, 33% yield). Both were isolated as colorless oil.

**(1*S*,5*R*,8*R*)-(R)-1,1,1-trichloro-4-(hex-5-yn-1-ylamino)-4-oxobutan-2-yl 8-methyl-4-methylene-7-oxo-2-azabicyclo[3.3.1]nonane-2-sulfonate **25**.** <sup>1</sup>H NMR (500 MHz, CDCl<sub>3</sub>) δ 5.63 (m, 1H), 5.53 (t, *J* = 4.5 Hz, 1H), 4.95 (s, 1H) 4.91 (s, 1H), 4.52 (s, 1H),

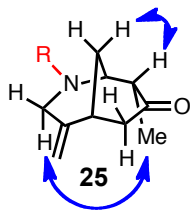

4.22 (d, *J* = 16.5 Hz, 1H), 3.47 (d, *J* = 17.0 Hz, 1H), 3.35-3.29 (m, 2H), 3.10 (s, 1H), 3.06 (dd, *J* = 16.0, 4.0 Hz, 1H), 2.80 (dd, *J* = 16.5, 5.0 Hz, 1H), 2.67 (dd, *J* = 16.0, 5.5 Hz, 1H), 2.62-2.56 (m, 1H), 2.52 (d, *J* = 16.0 Hz, 1H), 2.32 (dd, *J* = 13.5, 3.0 Hz, 1H), 2.23 (dt, *J* = 7.0, 2.5 Hz, 2H),

2.12 (d, *J* = 13.5 Hz, 1H), 1.96 (t, *J* = 2.5 Hz, 1H), 1.68-1.53 (m, 4H), 1.27 (d, *J* = 6.5 Hz, 3H); <sup>13</sup>C NMR (125 MHz, CDCl<sub>3</sub>) δ 210.1, 167.3, 141.7, 112.8, 98.7, 84.7, 84.2, 68.9, 58.1, 48.9, 47.4, 46.4, 39.9, 39.6, 39.2, 33.6, 28.6, 25.8, 18.2, 11.6; HRMS (MALDI+): *m/z* calcd. for C<sub>20</sub>H<sub>28</sub>Cl<sub>3</sub>N<sub>2</sub>O<sub>5</sub>S [M+H] 513.0785, found 513.0802. The stereochemistry of **25** was confirmed by NOESY analysis.

#### Cleavage of sulfamate side chain to give amines **26** and **27**:

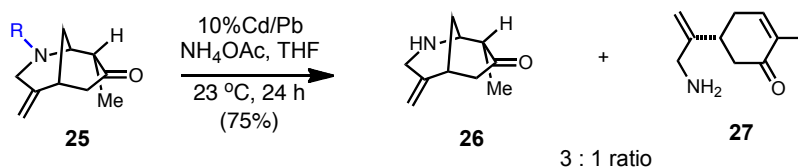

Sulfamate **25** (15 mg, 0.03 mmol, 1.0 equiv.) was dissolved in THF (0.5 mL), and mixed with *aq.* NH<sub>4</sub>OAc solution (1M, 0.5 mL) and 28 mg of 10% Cd/Pb couple<sup>2</sup> was added in one portion and the suspension was vigorously stirred for 2 h. Additional 10% Cd/Pb couple (17 mg) was added and the mixture was vigorously stirred overnight. The mixture was filtered through a short pad of Celite and eluted with MeOH (5 x 1 mL). The filtrate was concentrated and the residue was purified by flash column chromatography (eluting with MeOH/CH<sub>2</sub>Cl<sub>2</sub>) to isolate the product (4 mg, 0.02 mmol, 75% yield) as a colorless oil, which was identified as a 3:1 mixture of compound **26** and **27**.

**(1*S*,5*R*,8*R*)-8-methyl-4-methylene-2-azabicyclo[3.3.1]nonan-7-one **26** (Major product).** <sup>1</sup>H NMR (500 MHz, CD<sub>3</sub>OD) δ 4.79 (dd, *J* = 4.5, 1.0 Hz, 2H), 4.34 (br s, 1H), 4.10 (d, *J* = 16.5 Hz, 1H), 3.25 (d, *J* = 17.0 Hz, 1H), 3.03 (br s, 1H), 2.78 (dd, *J* = 16.0,

<sup>2</sup> Q. Dong, C. E. Anderson, M. A. Ciufolini *Tetrahedron Lett.* **1995**, *36*, 5681-5682.

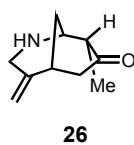

6.0 Hz, 1H), 2.67-2.63 (m, 1H), 2.52 (ddd,  $J = 13.5, 7.0, 4.0$  Hz, 1H), 2.33 (dt,  $J = 15.5, 2.5$  Hz, 1H), 2.01 (dt,  $J = 13.0, 2.5$  Hz, 1H), 1.18 (d,  $J = 7.0$  Hz, 3H);  $^{13}\text{C}$  NMR (125 MHz,  $\text{CD}_3\text{OD}$ )  $\delta$  215.3, 147.2, 109.8, 57.7, 50.5, 49.0, 46.5, 41.4, 33.2, 11.9; LRMS (APCI+):  $m/z$  calcd. for  $\text{C}_{10}\text{H}_{16}\text{NO}$   $[\text{M}+\text{H}]$  166.1, found 166.1.

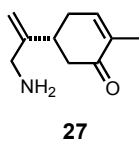

**(R)-5-(3-aminoprop-1-en-2-yl)-2-methylcyclohex-2-enone 27 (Minor product).**  $^1\text{H}$  NMR (500 MHz,  $\text{CD}_3\text{OD}$ )  $\delta$  6.88 (dd,  $J = 5.5, 1.0$  Hz, 1H), 5.12 (s, 1H), 4.92 (s, 1H), 3.63 (d,  $J = 3.0$  Hz, 2H), 2.96-2.90 (m, 1H), 2.60-2.56 (m, 2H), 2.51-2.45 (m, 1H), 2.40-2.36 (m, 1H), 1.74 (d,  $J = 1.0$  Hz, 3H);  $^{13}\text{C}$  NMR (125 MHz,  $\text{CD}_3\text{OD}$ )  $\delta$  202.2, 150.1, 147.5, 136.0, 111.7, 48.4, 44.2, 40.1, 32.8, 15.7.

### Cleavage of sulfamate side chain to give primary amine derivative of gibberelic acid derivative **32**:

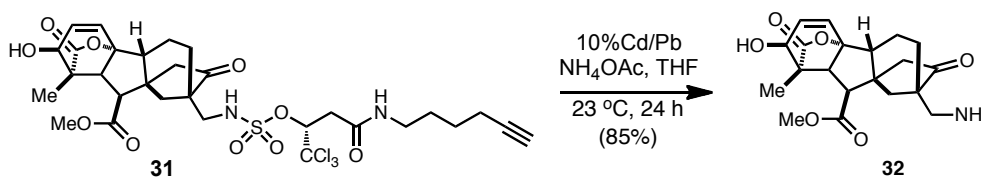

Sulfamate **31** (22 mg, 0.03 mmol, 1.0 equiv.) was dissolved in THF (0.5 mL). *aq.*  $\text{NH}_4\text{OAc}$  solution (1M, 0.5 mL) and 28 mg of 10% Cd/Pb couple were added in one portion and the suspension was stirred vigorously at room temperature (23 °C) for 2 h. An additional portion of 10% Cd/Pb couple (17 mg) was added and the mixture was vigorously stirred overnight. The mixture was filtered through a short pad of Celite and eluted with MeOH (5 x 1 mL). The filtrate was concentrated and the residue was purified by flash column chromatography (eluting with MeOH/ $\text{CH}_2\text{Cl}_2$ ) to isolate the product **32** (9.6 mg, 0.026 mmol, 85% yield) as colorless oil.

### (1S,2S,4aR,4bR,9aS,10S)-methyl 7-(aminomethyl)-2-hydroxy-1-methyl-8,13-dioxo-1,2,4b,5,6,7,8,9,10,10a-decahydro-4a,1-(epoxymethano)-7,9a-

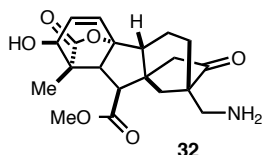

**methanobenzo[ $\alpha$ ]azulene-10-carboxylate 32.**  $^1\text{H}$  NMR (500 MHz,  $\text{CD}_3\text{OD}$ )  $\delta$  6.47 (d,  $J = 10.0$  Hz, 1H), 5.90 (dd,  $J = 9.5, 3.5$

Hz, 1H), 4.05 (d,  $J = 3.5$  Hz, 1H), 3.76 (s, 3H), 3.29 (d,  $J = 7.0$  Hz, 1H), 3.12 (d,  $J = 13.0$  Hz, 1H), 3.00 (d,  $J = 13.0$  Hz, 1H), 2.82 (d,  $J = 7.5$  Hz, 1H), 2.77 (dd,  $J = 19.0, 3.5$  Hz, 1H), 2.28-2.23 (m, 3H), 2.10-2.06 (m, 1H), 2.74 (dd,  $J = 11.5, 3.5$  Hz, 1H), 1.63-1.60 (m, 2H), 1.47 (dt,  $J = 13.0, 6.5$  Hz, 1H), 1.25 (s, 3H);  $^{13}\text{C}$  NMR (125 MHz,  $\text{CD}_3\text{OD}$ )  $\delta$  219.8, 180.9, 174.6, 134.7, 131.7, 91.3, 71.4, 56.5 (2C), 54.0, 52.6, 52.5, 51.9, 51.3, 50.9, 47.3, 44.4, 33.2, 19.8, 14.7; HRMS (MALDI+):  $m/z$  calcd. for  $\text{C}_{20}\text{H}_{26}\text{NO}_6$   $[\text{M}+\text{H}]$  376.1754, found 376.1768.

### Cleavage of sulfamate side chain to give *N*-amino brucine **34**:

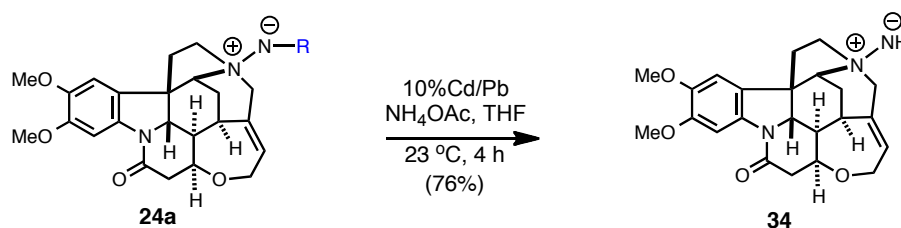

Inner salt **24a** (1.1 mg, 0.0015 mmol, 1.0 equiv.) was dissolved in THF (0.05 mL). *aq.*  $\text{NH}_4\text{OAc}$  solution (1M, 0.05 mL) and 2 mg of 10% Cd/Pb couple were added in one portion and the suspension was vigorously stirred at room temperature (23 °C) for 2 h. Additional 10% Cd/Pb couple (2 mg) was added and the mixture was vigorously stirred for additional 2 h. The mixture was filtered through a short pad of Celite, rinsed with MeOH (5 x 1 mL). The filtrate was concentrated and the residue was purified by prep. TLC purification (developed with 5% MeOH/ $\text{CH}_2\text{Cl}_2$ ), and the major UV absorption band was collected and extracted with 25% of MeOH/ $\text{CH}_2\text{Cl}_2$ . A colorless oil (449  $\mu\text{g}$ , 1.1  $\mu\text{mol}$ , 76% yield) was obtained after evaporation of solvents.

**((4a*R*,4a1*R*,5a*S*,6*S*,8a*S*,8a1*S*,15a*S*)-10,11-dimethoxy-14-oxo-2,4a,4a1,5,5a,6,7,8,8a1,14,15,15a-dodecahydro-4,6-methanoindolo[3,2,1-*ij*]oxepino[2,3,4-*de*]pyrrolo[2,3-*h*]quinolin-6-ium-6-yl)amide **34**.**  $^1\text{H}$  NMR (500 MHz,  $\text{CDCl}_3$ )  $\delta$  8.59 (br s, 1H), 7.76 (d,  $J = 1.0$  Hz, 1H), 7.20 (d,  $J = 1.0$  Hz, 1H), 6.45 (br s, 1H), 5.11 (dd,  $J = 12.5, 7.0$  Hz, 1H), 5.07 (br s, 1H), 4.77 (d,  $J = 13.5$  Hz, 1H), 4.40 (d,  $J = 14.0$  Hz, 1H), 4.35 (d,  $J = 8.5$  Hz, 1H), 4.30 (dd,  $J = 14.0, 7.0$  Hz, 1H), 4.10 (dd,  $J = 13.5, 5.5$  Hz, 1H), 4.00 (d,  $J = 10.5$  Hz, 1H), 3.96 (s, 3H), 3.91 (s, 3H), 3.73 (dt,  $J = 13.5,$



5.5 Hz, 1H), 3.34 (br s, 1H), 3.16 (dd,  $J = 17.5, 9.0$  Hz, 1H), 2.94 (d,  $J = 15.5$  Hz, 1H), 2.83 (dt,  $J = 14.5, 7.5$  Hz, 1H), 2.68 (d,  $J = 17.5$  Hz, 1H), 2.10 (dd,  $J = 14.0, 4.5$  Hz, 1H), 1.80 (d,  $J = 15.0$  Hz, 1H), 1.44 (d,  $J = 10.5$  Hz, 1H);  $^{13}\text{C}$  NMR (125 MHz,  $\text{CDCl}_3$ )  $\delta$  168.2, 150.3, 147.1, 137.2, 135.2, 132.8, 118.4, 105.3, 100.7, 78.5, 77.5, 66.5, 64.2, 61.3, 58.8, 56.6, 56.3, 52.3, 47.2, 42.1, 39.2, 30.1, 25.4; HRMS (ESI+):  $m/z$  calcd. for  $\text{C}_{23}\text{H}_{28}\text{N}_3\text{O}_4$  [M+H] 410.2080, found 410.2063.

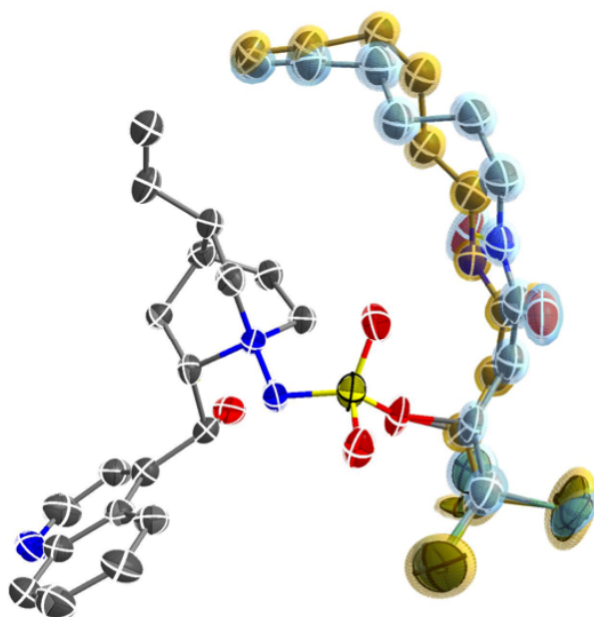

**Figure S1.** ORTEP Representation of Single Crystal X-ray Structure of (R)-((R)-quinolin-4-yl((1S,2S,4S,5R)-5-vinylquinuclidin-2-yl)methanol-1-ium-1-yl)(((1,1,1-trichloro-4-(hex-5-yn-1-ylamino)-4-oxobutan-2-yl)oxy)sulfonyl)amide 23a (CCDC Registry # 930772)

CheckCif Alerts and Responses: \_vrf\_PLAT374\_ALERT\_2\_A; PROBLEM: long N - N Bond (> 1.45 Angstrom) RESPONSE: N+-N(-) single bond; \_vrf\_PLAT327\_ALERT\_2\_B; PROBLEM: Check for Possibly Missing H on sp3? Carbon .... >C21\_3 RESPONSE: Disordered amine-alkane chain: CIFCHECK program error all H atoms present; \_vrf\_PLAT327\_ALERT\_2\_B; PROBLEM: Check for Possibly Missing H on sp3? Carbon .... <C21\_4 RESPONSE: Disordered amine-alkane chain: CIFCHECK program error all H atoms present; \_vrf\_PLAT420\_ALERT\_2\_B; PROBLEM: D-H Without Acceptor \*O1W - \*H1WA ... ? RESPONSE: Disordered amine-alkane chain: H-bond to amine; \_vrf\_PLAT420\_ALERT\_2\_B; PROBLEM: D-H Without Acceptor \*O1W - \*H1WB ... ? RESPONSE: Disordered amine-alkane chain: H-bond to amine

### **Cell culture**

HL-60 cells (ATCC) were grown in RPMI 1640 (Mediatech) supplemented with 10% fetal bovine serum (FBS) (Gemini). Cells were passaged six times in RPMI-1640 minus L-Lysine and L-Arginine (Thermo) supplemented 10% dialyzed FBS (Gemini) and 100 mg / L [ $^{13}\text{C}_6$ ,  $^{15}\text{N}_4$ ] L- Arginine-HCl and [ $^{13}\text{C}_6$ ,  $^{15}\text{N}_2$ ] L-Lysine-HCl (Aldrich) or L-Arginine-HCl and L-Lysine-HCl (Sigma) and cell aliquots were frozen and replaced periodically. HEK293T cells were grown in DMEM supplemented with 10% FBS.

### **EuPAyne labeling**

EuPA and EuPAyne were dissolved in DMSO to make 50 mM stock solutions and stored at  $-80\text{ }^\circ\text{C}$ . Immediately before labeling experiments, the EuPA stock solution was added to serum free RPMI media to make a 150  $\mu\text{M}$  solution and the EuPAyne stock solution was added to serum free RPMI to make a 50  $\mu\text{M}$  solution. In the **control experiments**, 9E6 heavy and light cells in 9 mL were treated with 1 mL of the 50  $\mu\text{M}$  EuPAyne RPMI/DMSO solution (5  $\mu\text{M}$  EuPAyne final concentration) and incubated at  $37\text{ }^\circ\text{C}$  for 30 min. In the **competition experiments**, the light cells (8E6 in 8 mL) were pretreated with 1 mL of 150  $\mu\text{M}$  EuPA. After incubation at  $37\text{ }^\circ\text{C}$  for 30 min, 1 mL of 50  $\mu\text{M}$  EuPAyne was added (giving final 5  $\mu\text{M}$  EuPAyne and 15  $\mu\text{M}$  EuPA), and the cells were incubated for an additional 30 min at  $37\text{ }^\circ\text{C}$ . Heavy cells (8E6 cells in 8 mL) were treated with 1 mL of 0.1% DMSO in serum free RPMI for 30 min at  $37\text{ }^\circ\text{C}$ . EuPAyne (1 mL of 50  $\mu\text{M}$  dms0/RPMI solution) was then added and the cells were incubated at  $37\text{ }^\circ\text{C}$  for an additional 30 min. Following labeling, cells were collected by centrifugation (500x g) and washed with PBS (2 x 10 mL) and stored as pellets at  $-80\text{ }^\circ\text{C}$ .

### **Lysate preparation, click chemistry, and enrichment**

Frozen cell pellets were resuspended in 65  $\mu\text{L}$  PBS and sonicated. Protein concentrations were determined using the BCA protein assay on a microplate reader. For fluorescent gel-based analysis, 50  $\mu\text{g}$  of lysate (1 mg/mL) was mixed with 25 mM rhodamine-azide, 1 mM Tris(2-carboxyethyl)phosphine (TCEP, Sigma-Aldrich), 100 mM Tris[(1-benzyl-1H-1,2,3-triazol-4-yl)methyl]amine (TBTA) (Sigma-Aldrich), and 1 mM  $\text{CuSO}_4$  in PBS in a

1.5 mL plastic tube at room temperature. After 1 hour, samples were mixed with SDS sample loading buffer and loaded (10  $\mu\text{g}$ ) without boiling on a 4-20% gradient tris-glycine gel (Invitrogen, 150 Volts for 90 min) and imaged on a Hitachi FMBIO-II flatbed fluorescence scanner. For proteomic studies, 1 mg of both heavy and light proteomes were mixed equally in a 1:1 ratio and adjusted to 2 mL in PBS. 20  $\mu\text{L}$  1 mM  $\text{CuSO}_4$ , 60  $\mu\text{L}$  100  $\mu\text{M}$  TBTA, 20  $\mu\text{L}$  1 mM TCEP, and 40  $\mu\text{L}$  10 mM biotin-azide were added. After mixing for 1.5 hr, 2 mL MeOH and 0.5 mL  $\text{CHCl}_3$  were added, shaken, and centrifuged at 4000x g for 10 min at room temperature yielding a protein interphase between aqueous and organic layers. The top and bottom layers were aspirated, leaving the protein interphase. To the protein interphase 2 mL MeOH was added and the mixture was sonicated and 2 mL PBS and 0.5 mL  $\text{CHCl}_3$  were added. The mixture was shaken and then centrifuged at 4000x g. The top and bottom phases were aspirated leaving the protein interphase. The protein interphase was then washed with cold methanol and solubilized in 6 M urea in PBS containing 0.5% SDS (500  $\mu\text{L}$  final volume). The solution was treated with 10 mM neutralized TCEP for 30 minutes at 37  $^\circ\text{C}$  and followed with treatment with 20 mM iodoacetamide for 30 minutes at room temperature. The sample was diluted 10x in PBS and SDS was added to a final concentration of 0.2%. Streptavidin beads (Thermo) (100 mL slurry) were added and rotated at room temperature for 2 hours. Beads were transferred to Bio-spin filters (BioRad) and coupled to a vacuum manifold and washed with 10 x 1 mL 1% SDS in PBS, then 20 x 1 mL PBS. Beads were transferred to screw-top eppendorf tubes and resuspended in 2 M urea/PBS supplemented with 1 mM calcium chloride and sequence grade porcine trypsin (Promega) for overnight digestion at 37 $^\circ\text{C}$ . The eluant was collected the following day and acidified with 5% formic acid.

### **Mass spectrometry**

Mass spectrometry was performed using a Thermo Orbitrap Velos mass spectrometer. Peptides were eluted using a 5-step MudPIT protocol (using 0%, 25%, 50%, 80%, and 100% salt bumps of 500 mM aqueous ammonium acetate, each step followed by an increasing gradient of aqueous acetonitrile/0.1% formic acid) and data were collected in data-dependent acquisition mode with dynamic exclusion turned on (60 s, repeat of 1).

Specifically, one full MS (MS1) scan (400-1800 m/z) was followed by 7 MS2 scans of the most abundant ions. The MS2 spectra data were extracted from the raw file using RAW Xtractor (version 1.9.1; publicly available at <http://fields.scripps.edu/?q=content/download>). ProLuCID searches allowed for variable oxidation of methionine (+15.9949), static modification of cysteine residues (+57.0215 due to alkylation), and no enzyme specificity. Each data set was independently searched with light and heavy params files; for the light search, all other amino acids were left at default masses; for the heavy search, static modifications on lysine (8.0142) and arginine (10.0082) were specified. The precursor ion mass tolerance was set to 50 ppm and the fragment ion mass tolerance was left at the default assignment of 0. The data was searched using a human reverse-concatenated non-redundant (gene-centric) FASTA database using the ProLuCID (<http://fields.scripps.edu/prolucid/index.html>). The resulting MS2 spectra matches were assembled into protein identifications and filtered using DTASelect (version 2.0.47) with the --trypstat option, which applies different statistical models for the analysis of tryptic, half-tryptic, non-tryptic peptides. Redundant peptide identifications common between multiple proteins were allowed, but the database was restricted to a single consensus splice variant. SILAC ratios were quantified using in-house software.<sup>3</sup> The program was updated to identify cases where complete inhibition could not be quantified based on light/heavy peak pairs due the absence of a MS1 signal from either the heavy or light sample. In order to identify these cases, all single MS1 chromatographic peaks (from either the light or the heavy sample) were identified within a retention time window. Next, these peaks were aligned with the corresponding sequence ProLuCID /DTASelect identification and the charge state and monoisotopic mass were validated using the “envelope correlation score” filter.<sup>3</sup> Finally, the candidate peak was cross-checked to ensure there was no corresponding (heavy or light) peak co-eluting around the same retention time window. Only after all these conditions are met, the peptide was assigned as the case of complete inhibition with an artificial threshold ratio of 20. The described control and competition experiments were performed in duplicate. Ratios reported were the mean ratio of peptides for each given protein. Valid

---

<sup>3</sup> Weerapana E, Wang C, Simon GM, Richter F, Khare S, Dillon MB, et al. Quantitative reactivity profiling predicts functional cysteines in proteomes *Nature* **2010**, *468*, 790-795

ratios for at least 2 peptides per protein were required in order for the protein to be considered quantified (see Supplemental Table S2).

### **Plasmids**

The template for DRL1 were obtained from HL-60 cDNA using the forward primer (GCATGAATTCATGTCGGACATCG; ECOR1 cut site in red) and reverse primer (GCATCTCGAGCTGGTCTCCAAGTC; XhoI cut site in red). The template for CYB5B were obtained from HL-60 cDNA using the forward primer (GCATGAATTCATGTCCGGTTCAATGG; ECOR1 cut site in red) and reverse primer (GCATCTCGAGGGAGGATTTGCTTTCC; XhoI cut site in red). Each amplified cDNA was subcloned into the expression plasmid pcDNA3.1(+)-myc-His A (Invitrogen). Human TBXAS1 cDNA was obtained from OpenBiosystems in the pCMV-SPORT6 expression vector.

### **Validation of EuPA labeling events**

HEK293T cells were grown to 70% confluency in 10 cm dishes in DMEM (supplemented with 10% FCS). Cells were transfected using Fugene HD and 5 µg vector or empty vector control ("mock") using the manufacturers protocols. After 24 hrs, the cells were trypsanized and replated in duplicate in 6-well dishes. After an additional 24 hrs, the media was aspirated, and the cells were treated with EuPA (15 µM) or DMSO. After 30 min at 37 °C, EuPAyne (5 µM) was added and allowed to react for an additional 30 min at 37 °C. Cells were harvested, centrifuged (1400 g x 4 min) and the cell pellet wash washed twice with cold PBS. Cell pellets were sonicated and adjusted to 1 mg/mL using the BCA Assay. Conjugation to rhodamine-azide and imaging was performed as described above. Western blotting was performed using anti-TBXAS1 (1:1000 Cayman Chemical) or anti-Myc (1:1000 Invitrogen) using 100 µg sample.

| Uniprot<br>Accession | Description                                                     | Gene<br>Symbol | MW<br>kDa               | Ave.  |       |       |        | Ave.  |       |       |        |
|----------------------|-----------------------------------------------------------------|----------------|-------------------------|-------|-------|-------|--------|-------|-------|-------|--------|
|                      |                                                                 |                |                         | Rep 1 | Rep 2 | Ratio | S.E.M. | Rep 1 | Rep 2 | Ratio | S.E.M. |
| Q9BUN8               | DERL1 Derlin-1                                                  | DERL1          | 28.8/<br>26.4           | 0.96  | 0.9   | 0.93  | 0.03   | 20    | 0     | 20.00 | 0.00   |
| Q43169               | CYB5B Cytochrome b5 type B                                      | CYB5B          | 16.3                    | 0.96  | 0.91  | 0.94  | 0.03   | 20    | 20    | 20.00 | 0.00   |
| Q5TFE4               | NT5DC1 5-nucleotidase<br>domain-containing protein 1            | NT5DC1         | 51.8                    | 0.87  | 0.94  | 0.91  | 0.04   | 14.32 | 20    | 17.16 | 2.84   |
| P50416               | CPT1A Carnitine O-<br>palmitoyltransferase 1, liver<br>isoform  | CPT1A          | 88.4/<br>86.2           | 1.04  | 0.93  | 0.99  | 0.06   | 20    | 11.59 | 15.80 | 4.21   |
| O15533               | TAPBP Tapasin                                                   | TAPBP          | 43.9/<br>53.9           | 1     | 0.82  | 0.91  | 0.09   | 10.39 | 20    | 15.20 | 4.81   |
| P24557               | TBXAS1 Thromboxane-A<br>synthase                                | TBXAS1         | 60.5                    | 0.97  | 0.85  | 0.91  | 0.06   | 20    | 8.86  | 14.43 | 5.57   |
| Q03518               | TAP1 Antigen peptide<br>transporter 1                           | TAP1           | 87.2                    | 0.95  | 0.93  | 0.94  | 0.01   | 8.16  | 20    | 14.08 | 5.92   |
| Q9NQC3               | RTN4 Reticulon-4                                                | RTN4           | 129.9<br>/40.3<br>/22.0 | 0.99  | 0.91  | 0.95  | 0.04   | 9.91  | 9.04  | 9.48  | 0.44   |
| P04150               | NR3C1 Glucocorticoid<br>receptor                                | NR3C1          | 85.6/<br>64.8           | 0.8   | 0.86  | 0.83  | 0.03   | 4.35  | 12.84 | 8.60  | 4.25   |
| Q9Y6K0               | CEPT1<br>Choline/ethanolaminephospho<br>transferase 1           | CEPT1          | 46.6                    | 0.98  | 0.9   | 0.94  | 0.04   | 7.5   | 0     | 3.75  | 3.75   |
| Q5VV42               | CDKAL1 CDK5 regulatory<br>subunit-associated protein 1-<br>like | CDKAL1         | 65.1/<br>54.7/<br>11.0  | 0.76  | 0.51  | 0.64  | 0.13   | 12.07 | 2.72  | 7.40  | 4.68   |
| O95197               | RTN3 Reticulon-3                                                | RTN3           | 112.6<br>/26.4          | 0.98  | 0.96  | 0.97  | 0.01   | 6.79  | 6.85  | 6.82  | 0.03   |
| P16615               | ATP2A2<br>Sarcoplasmic/endoplasmic<br>reticulum calcium ATPase  | ATP2A2         | 114/<br>112             | 1     | 0.84  | 0.92  | 0.08   | 8.56  | 3.5   | 6.03  | 2.53   |
| Q8WV74               | NUDT8 Nucleoside<br>diphosphate-linked moiety X<br>motif 8      | NUDT8          | 25.4/<br>15             | 0.87  | 0.74  | 0.81  | 0.07   | 5.12  | 4.33  | 4.73  | 0.40   |

**Table S4.** Chemoproteomic list of high affinity EuPA targets. Ratios reported are the mean ratio of peptides for each given protein. Proteins were only considered if > 2 peptides were quantified. Targets with signals > 5-fold higher in EuPAYne (15  $\mu$ M) compared to EuPAYne + 3X EuPA (Competition experiment) are shown. A value of 20 was given as an upper limit ratio for peptides were completely competed with EuPA. See methods below for “control experiment” and “competition experiment” descriptions.

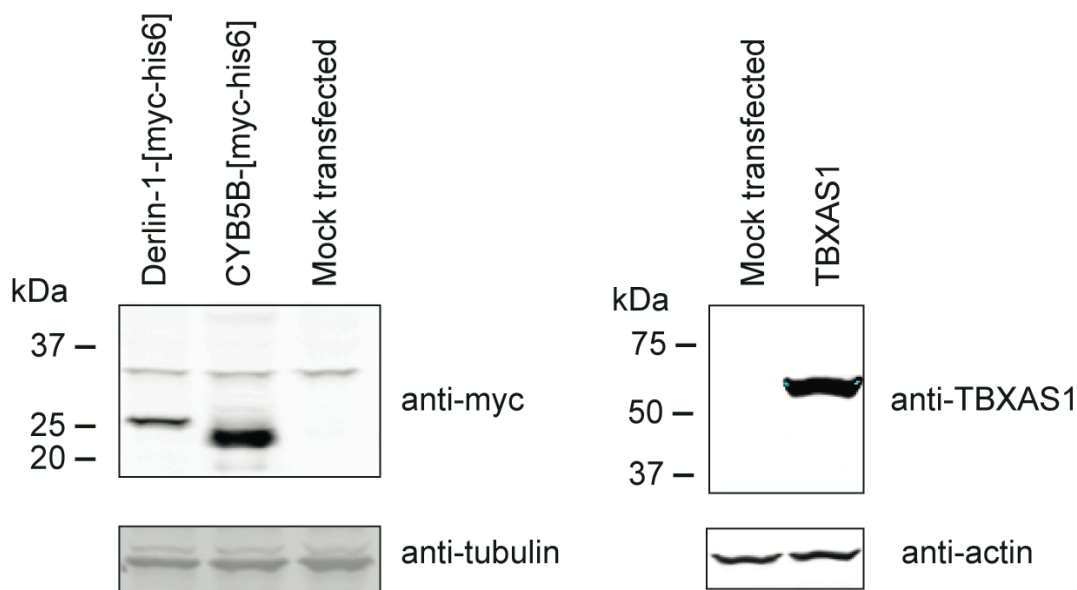

**Figure S2A.** Western blot from HEK293T cells overexpressing myc-His<sub>6</sub> tagged Derlin-1 or myc-His<sub>6</sub> tagged CYB5B or TBXAS1.

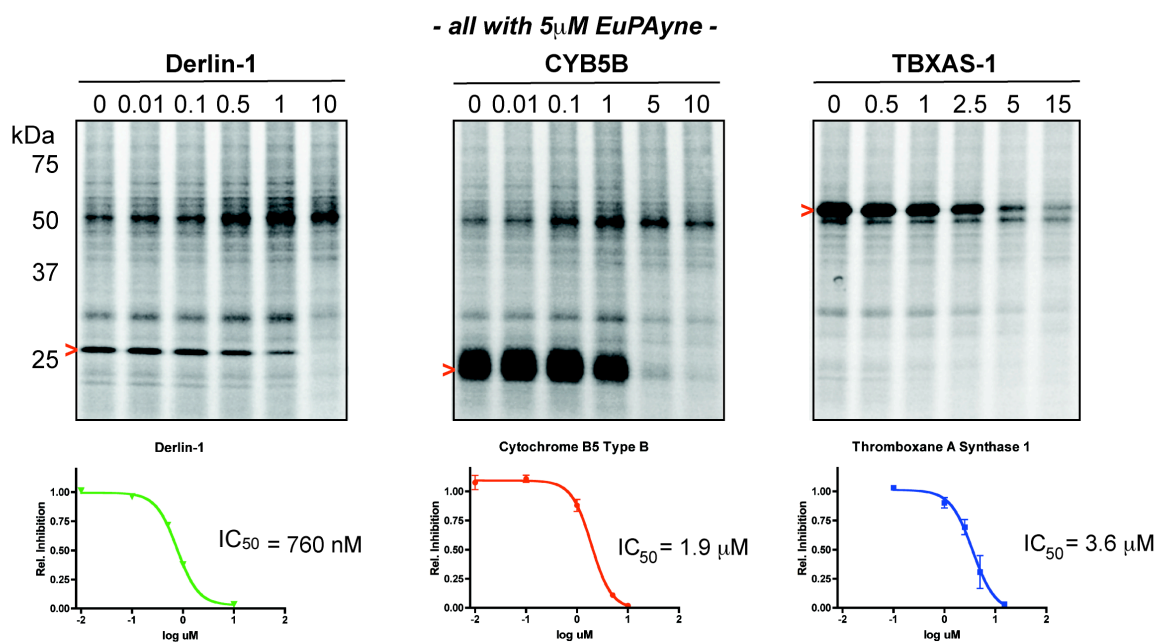

**Figure S2B.** *In situ* EuPAYne (5  $\mu$ M) labeling of 293T cells overexpressing target proteins competed with varying concentrations (0–10  $\mu$ M EuPA) and quantitation of labeling IC<sub>50</sub>. In-gel fluorescence scanning depicted in grayscale.

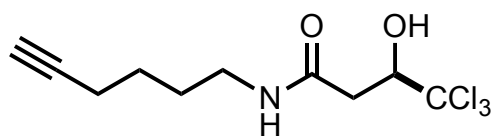**8**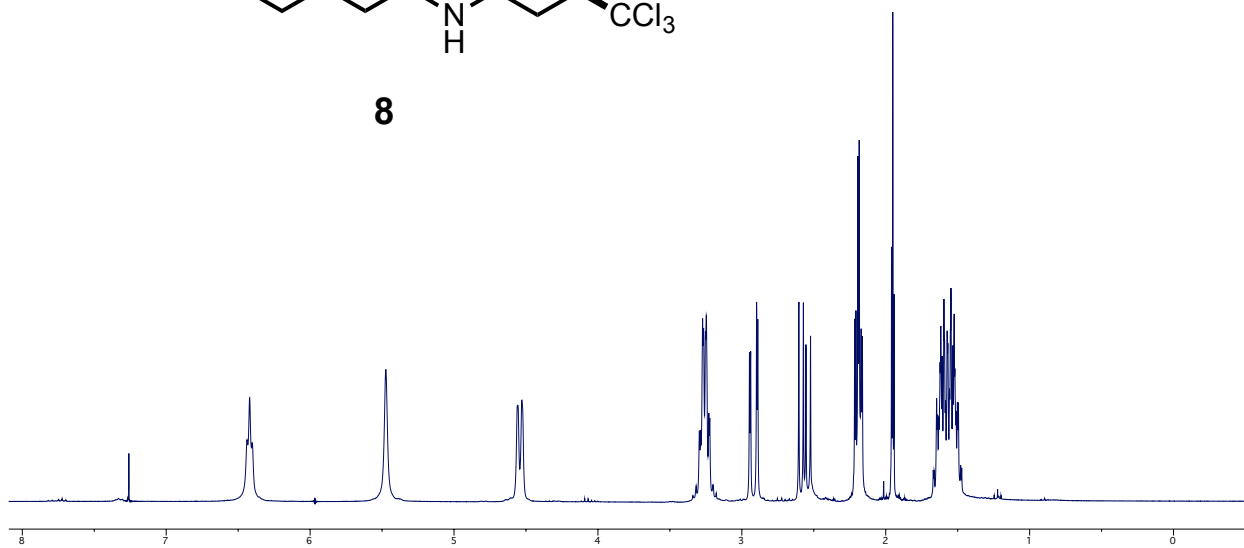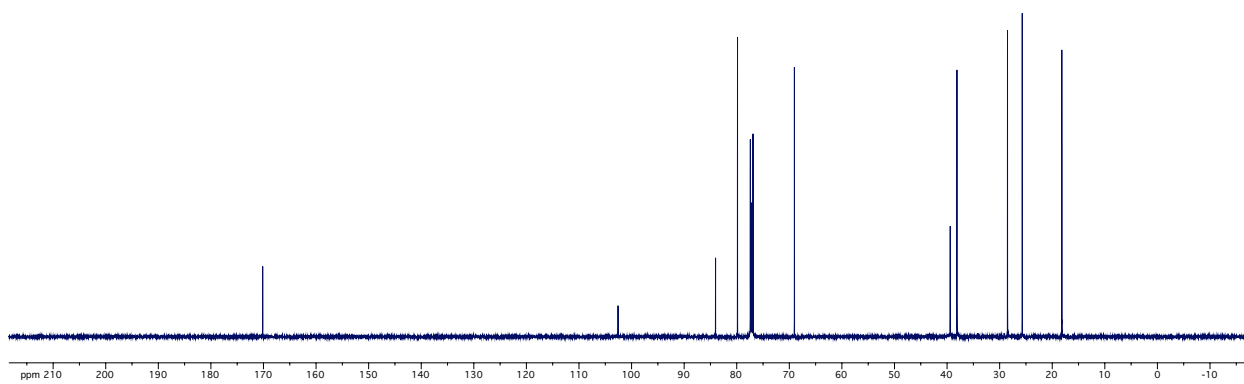

$^1\text{H}$  (300 MHz) and  $^{13}\text{C}$  (125 MHz) NMR of **8** in  $\text{CDCl}_3$



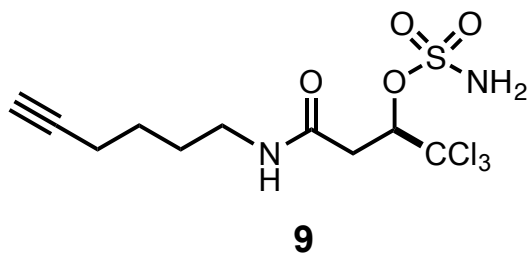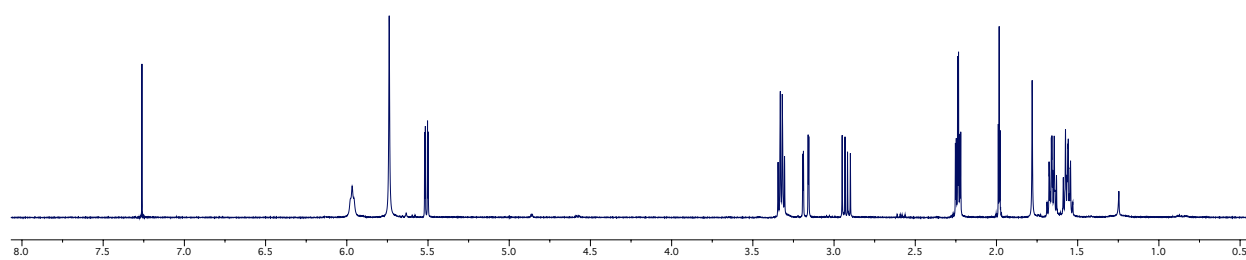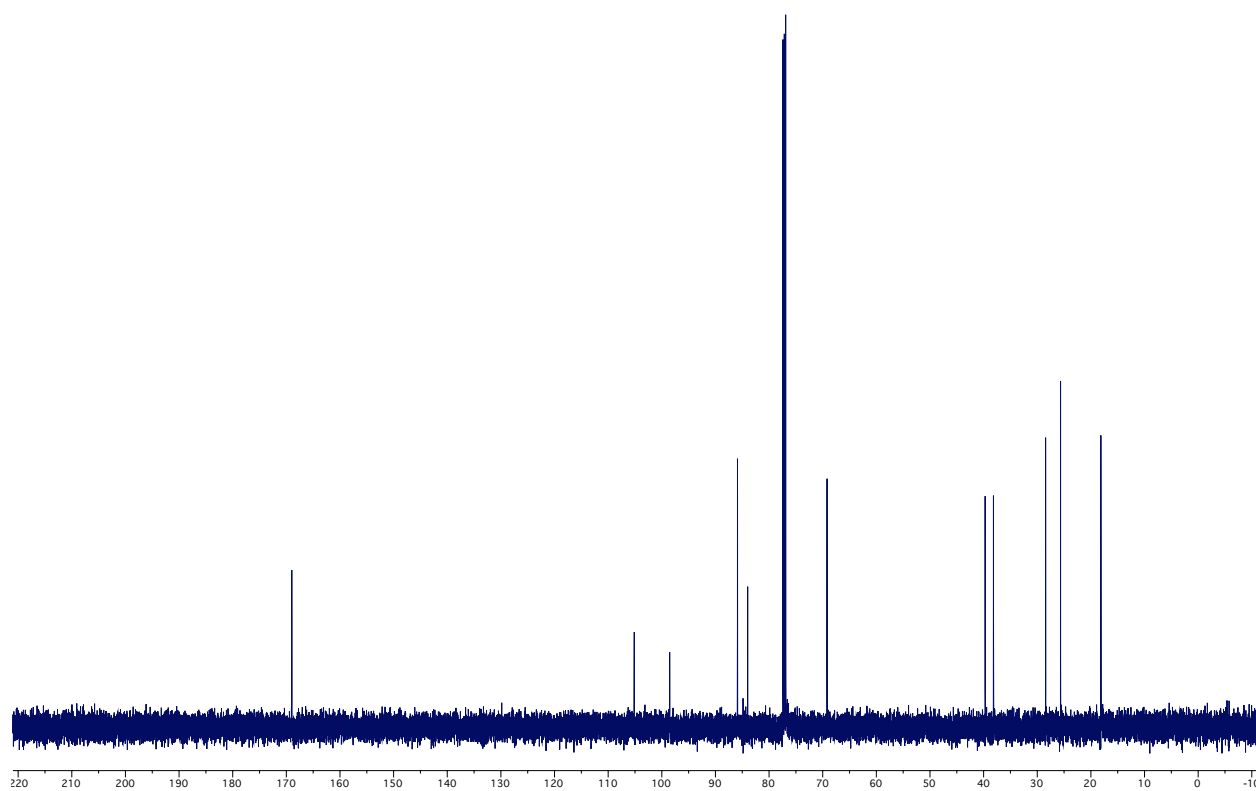

$^1\text{H}$  (500 MHz) and  $^{13}\text{C}$  (125 MHz) NMR of **9** in  $\text{CDCl}_3$

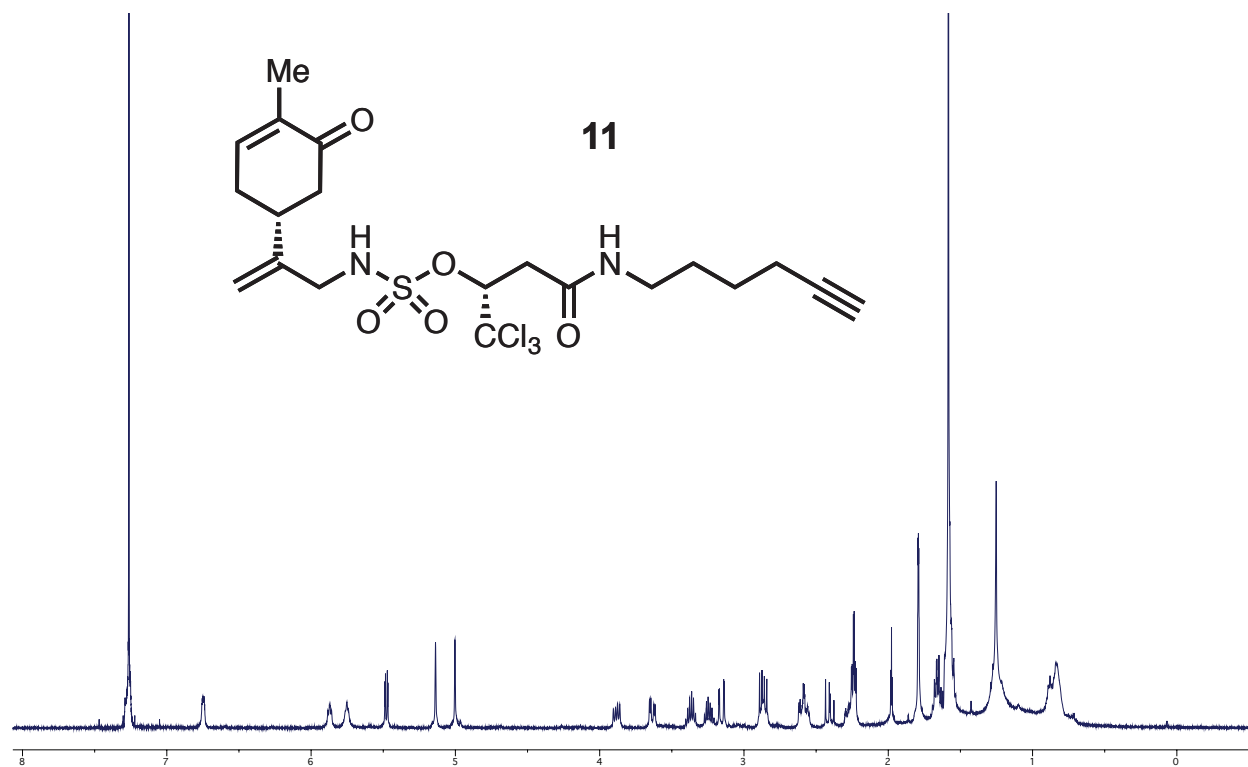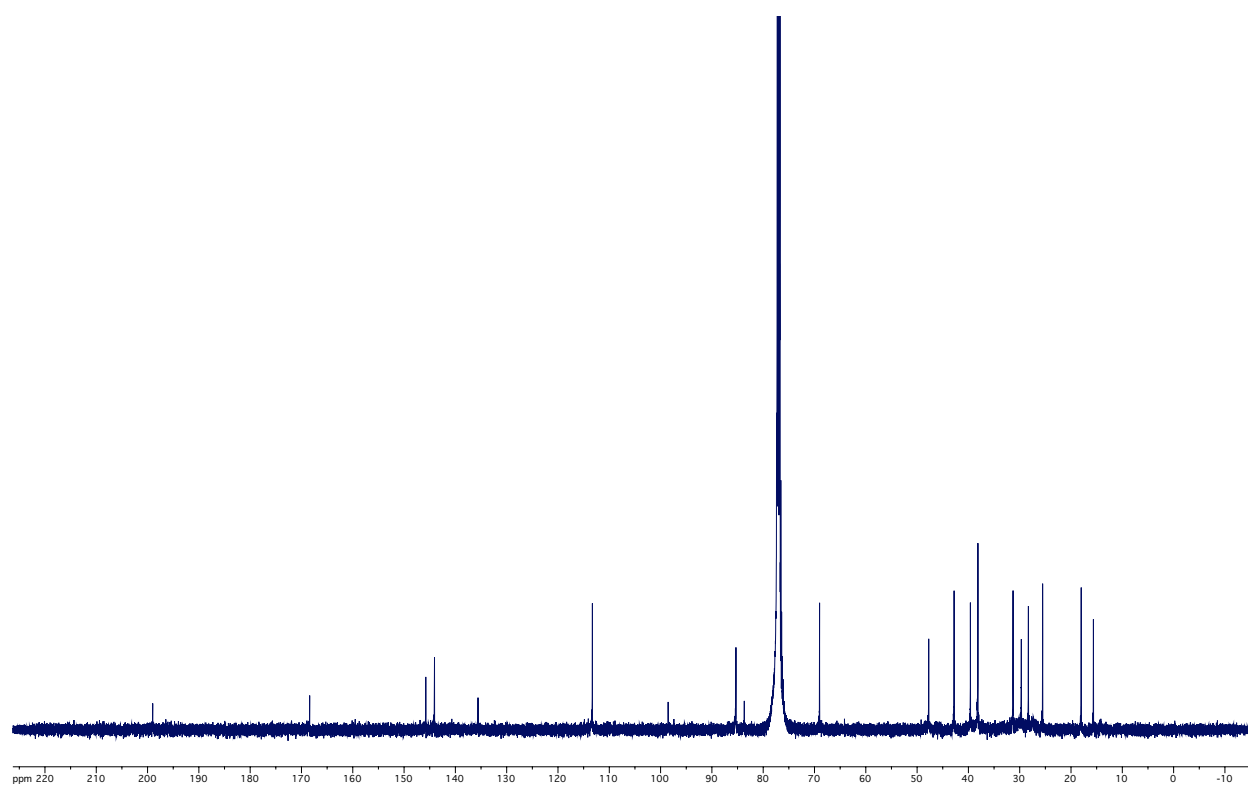

<sup>1</sup>H (500 MHz) and <sup>13</sup>C (125 MHz) NMR of **11** in CDCl<sub>3</sub>

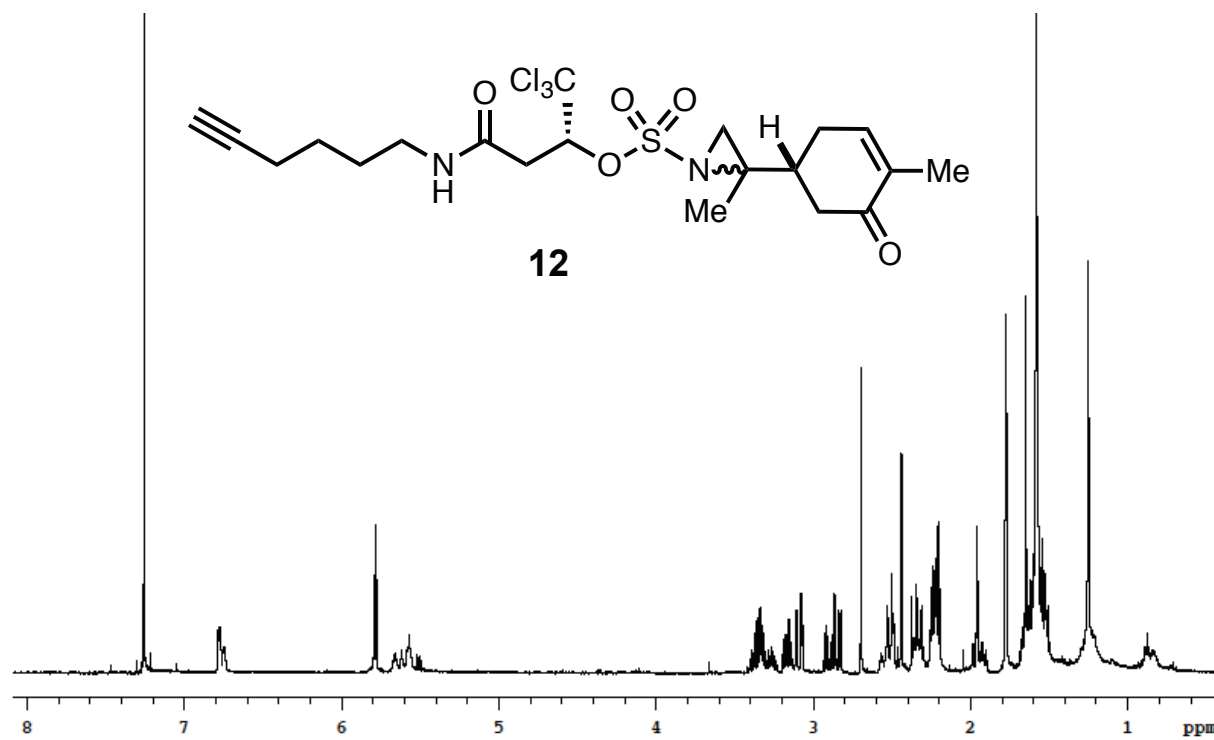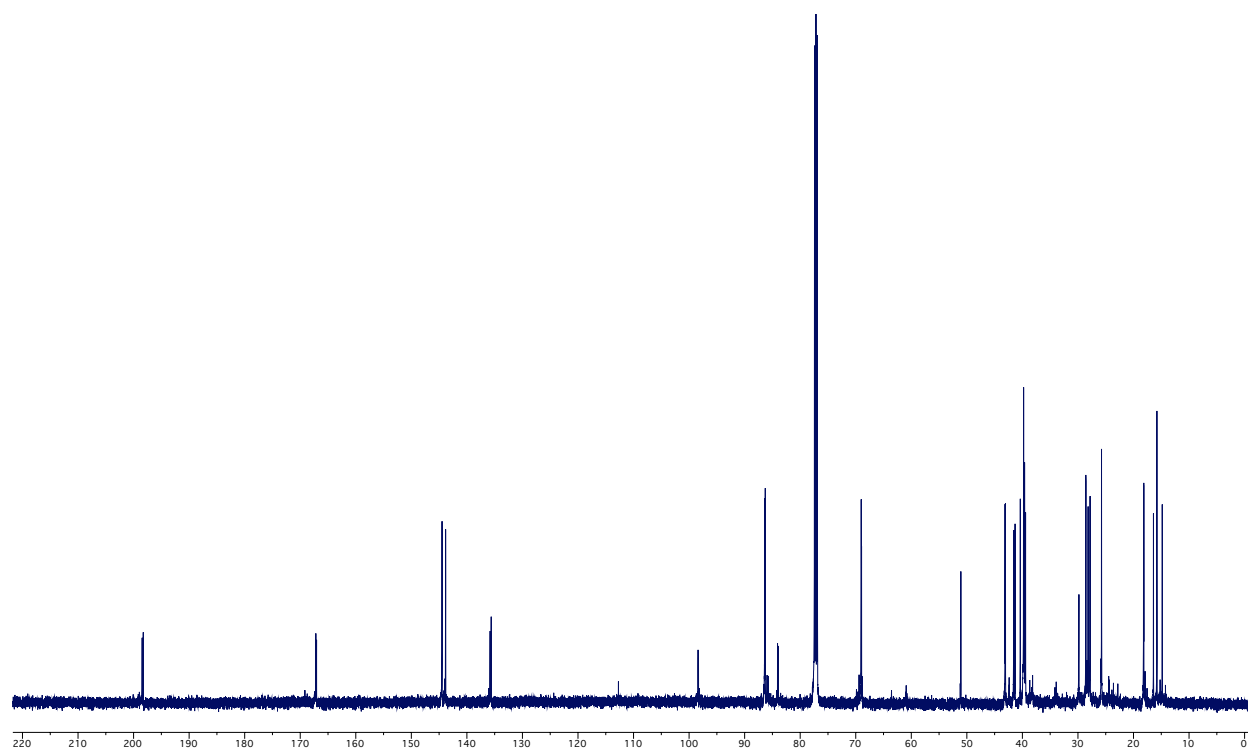

$^1\text{H}$  (500 MHz) and  $^{13}\text{C}$  (125 MHz) NMR of **12** (1.4:1 mixture of two diastereomers) in  $\text{CDCl}_3$

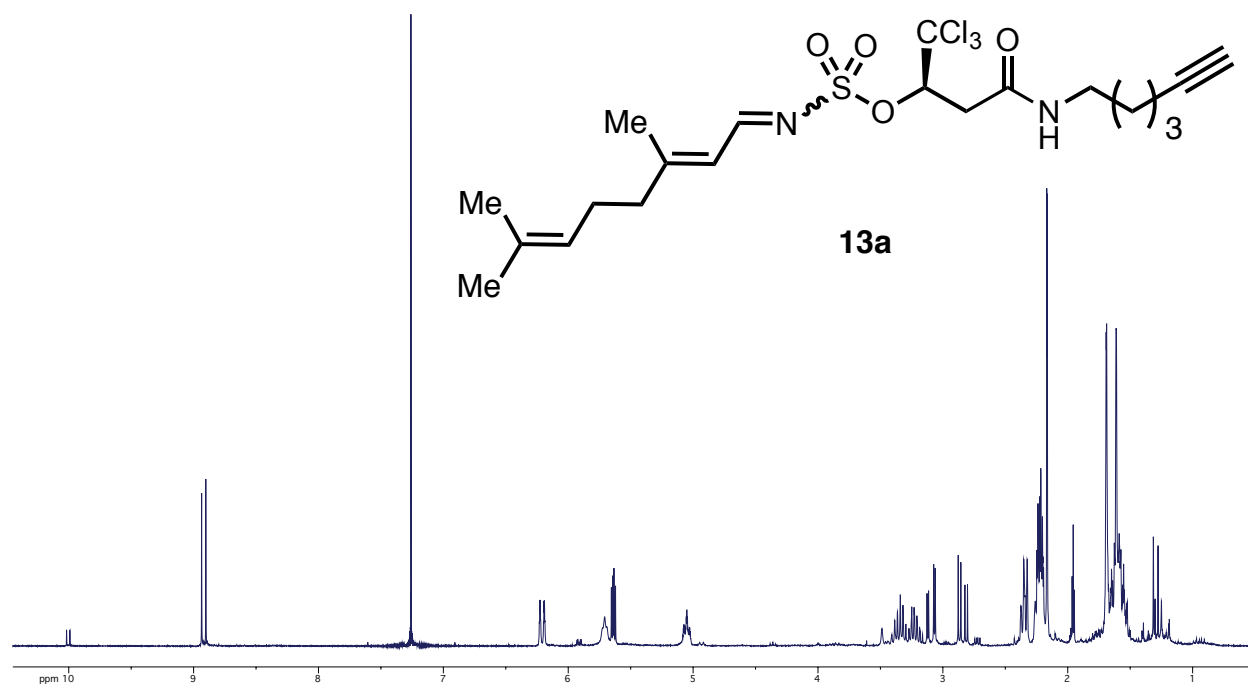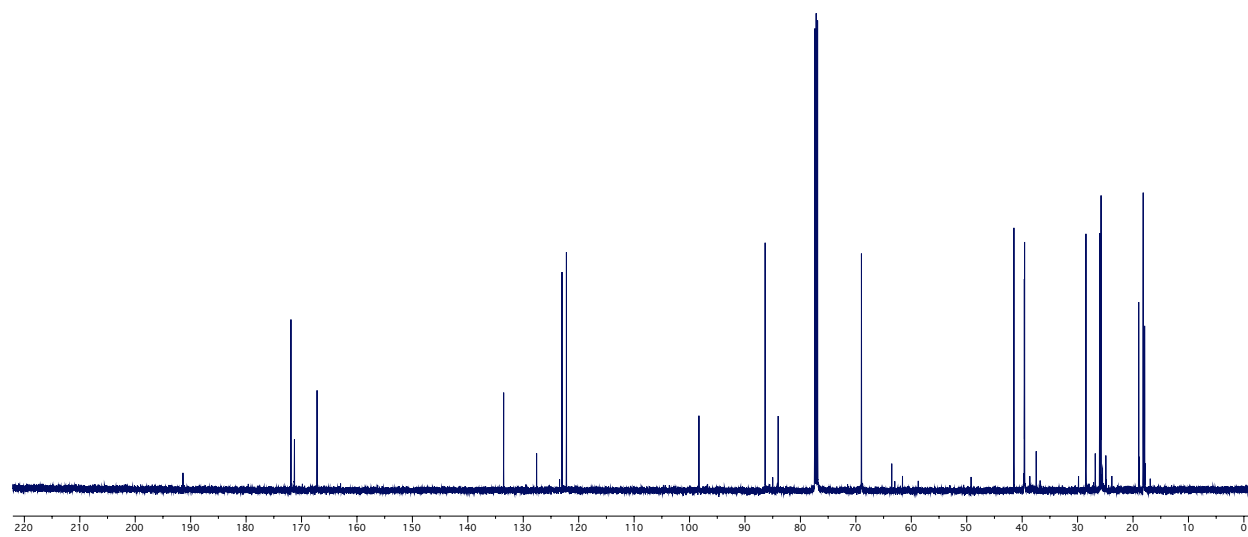

<sup>1</sup>H (500 MHz) and <sup>13</sup>C (125 MHz) NMR of **13a** (8:1 mixture of E/Z isomers) in CDCl<sub>3</sub>

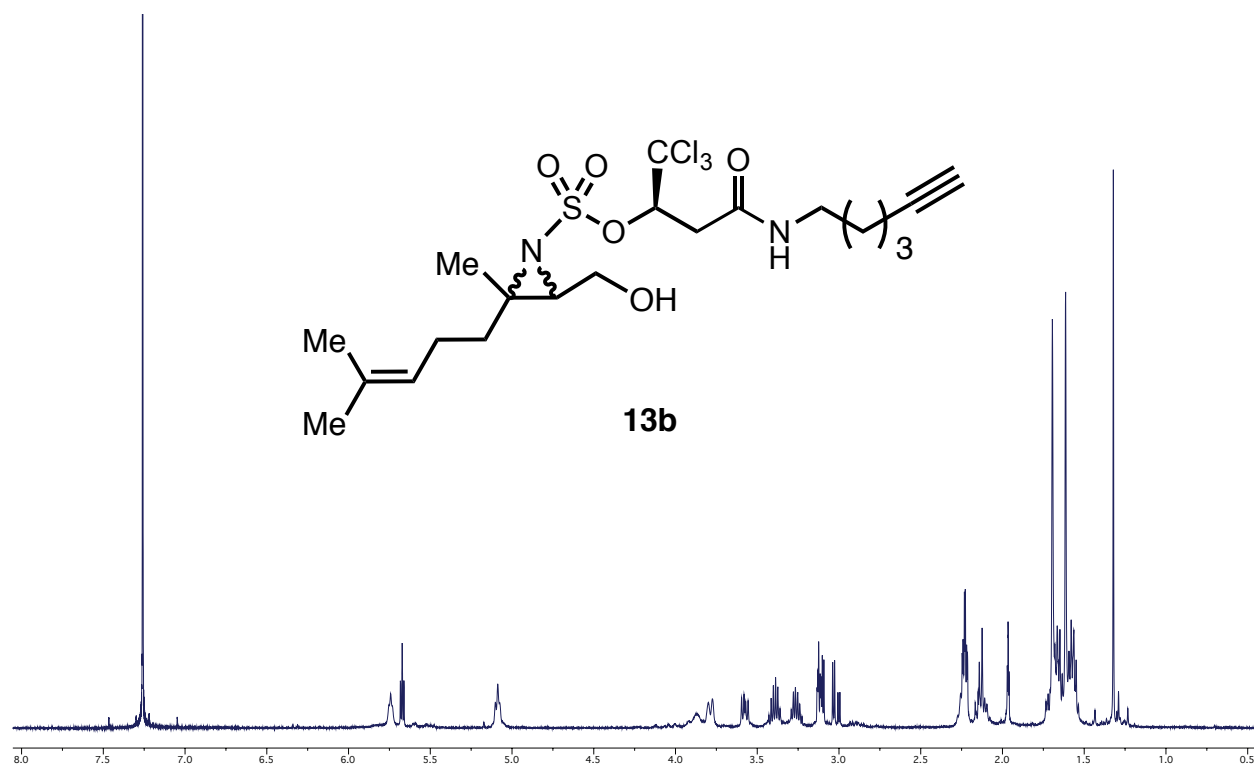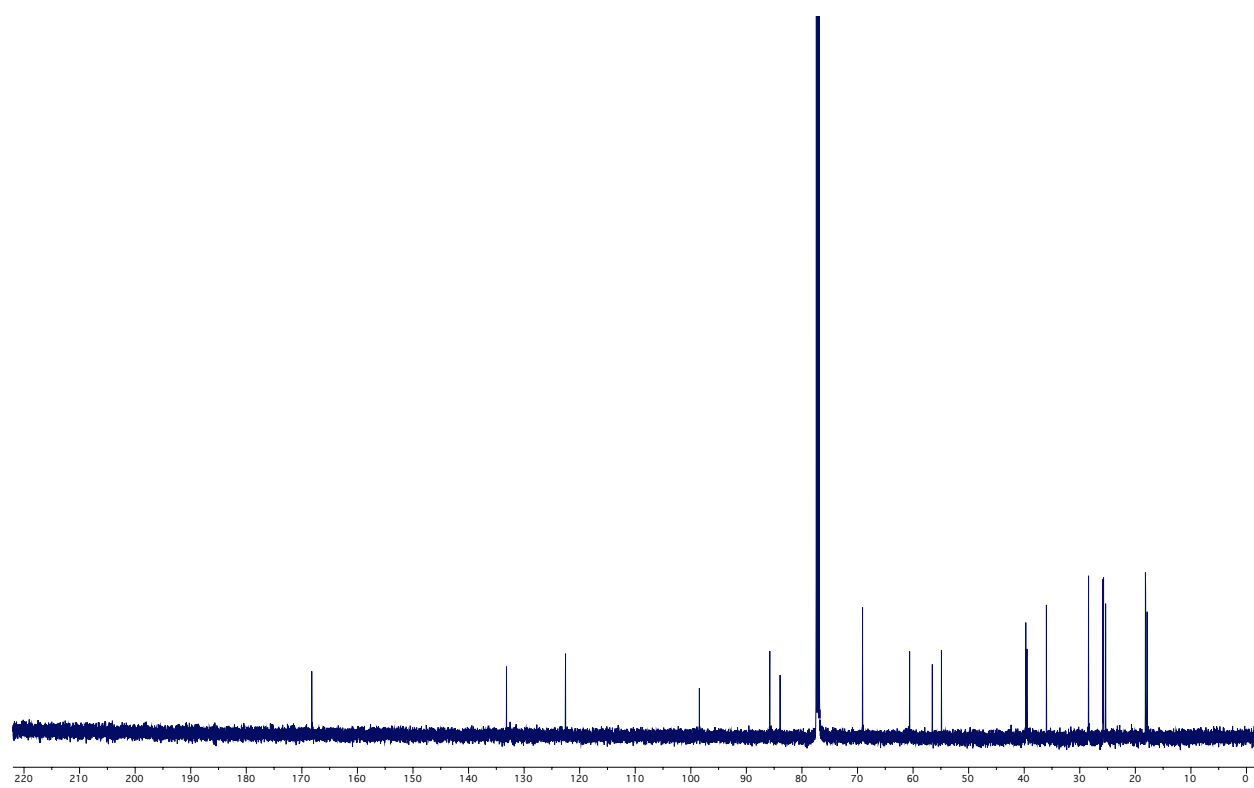

<sup>1</sup>H (500 MHz) and <sup>13</sup>C (125 MHz) NMR of **13b** (Major isomer) in CDCl<sub>3</sub>

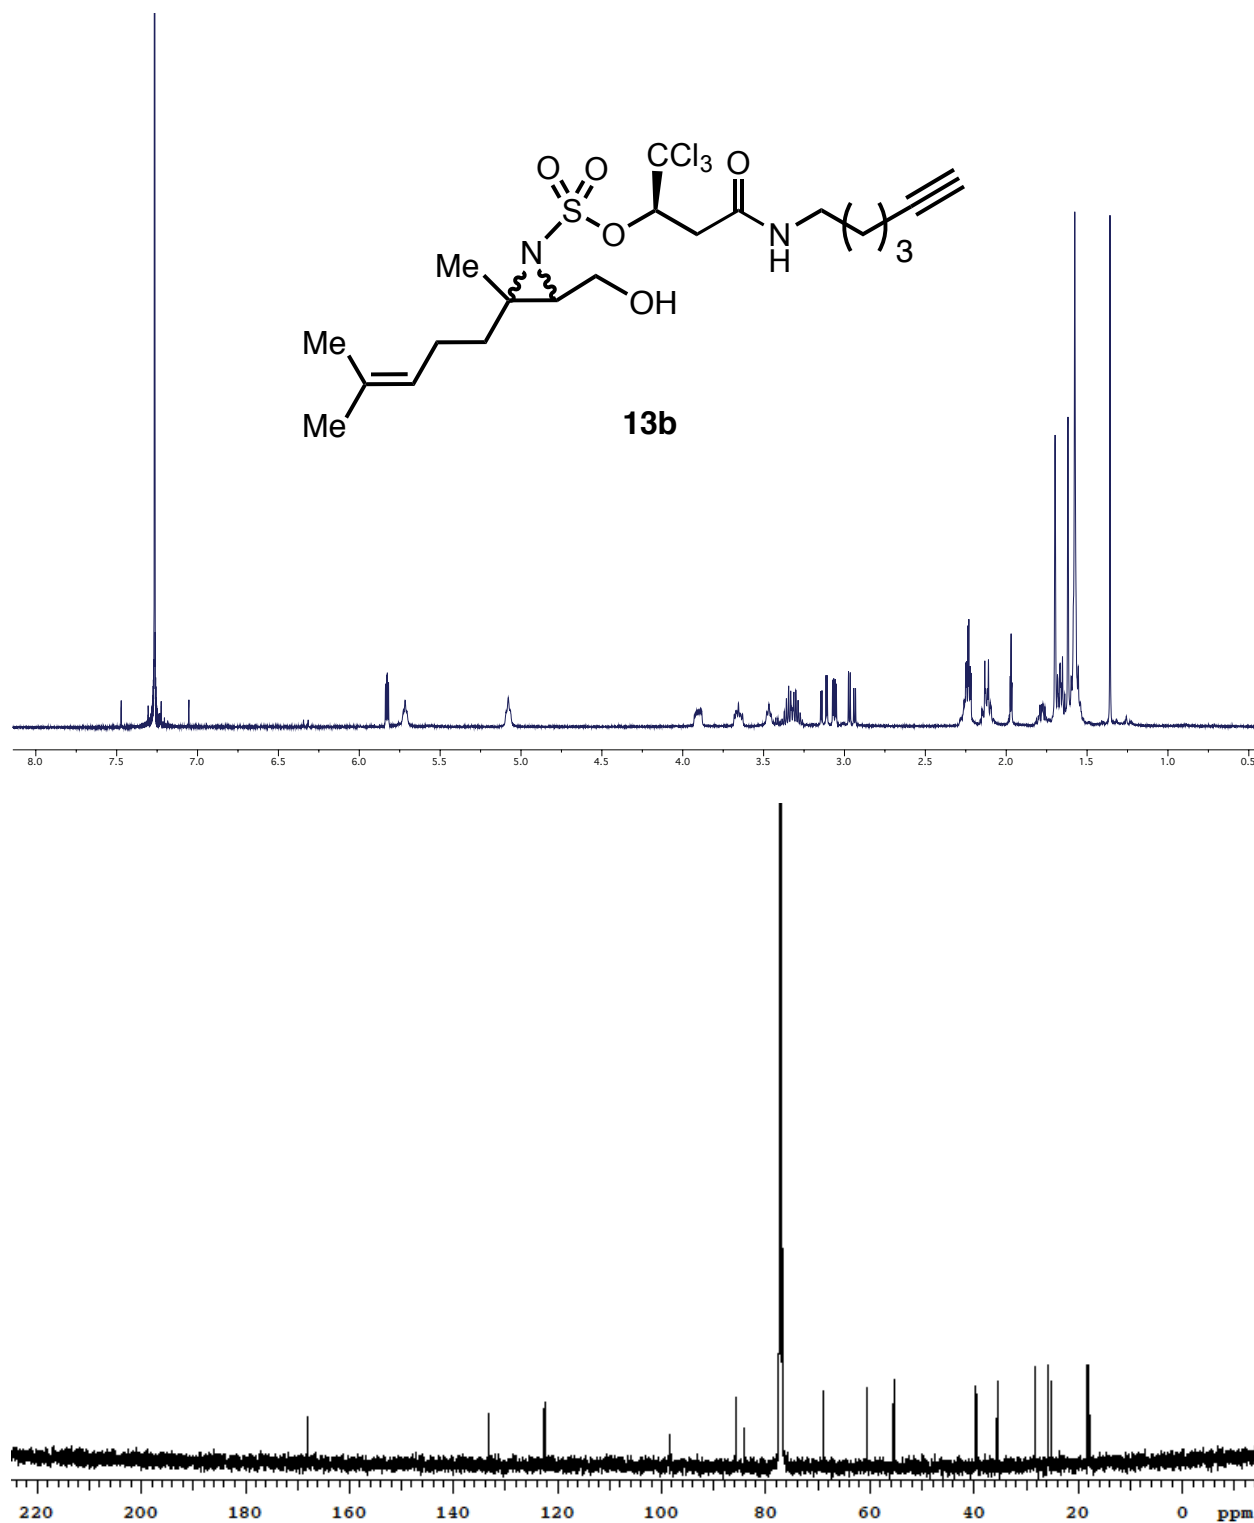

$^1\text{H}$  (500 MHz) and  $^{13}\text{C}$  (125 MHz) NMR of **13b** (Minor isomer) in  $\text{CDCl}_3$

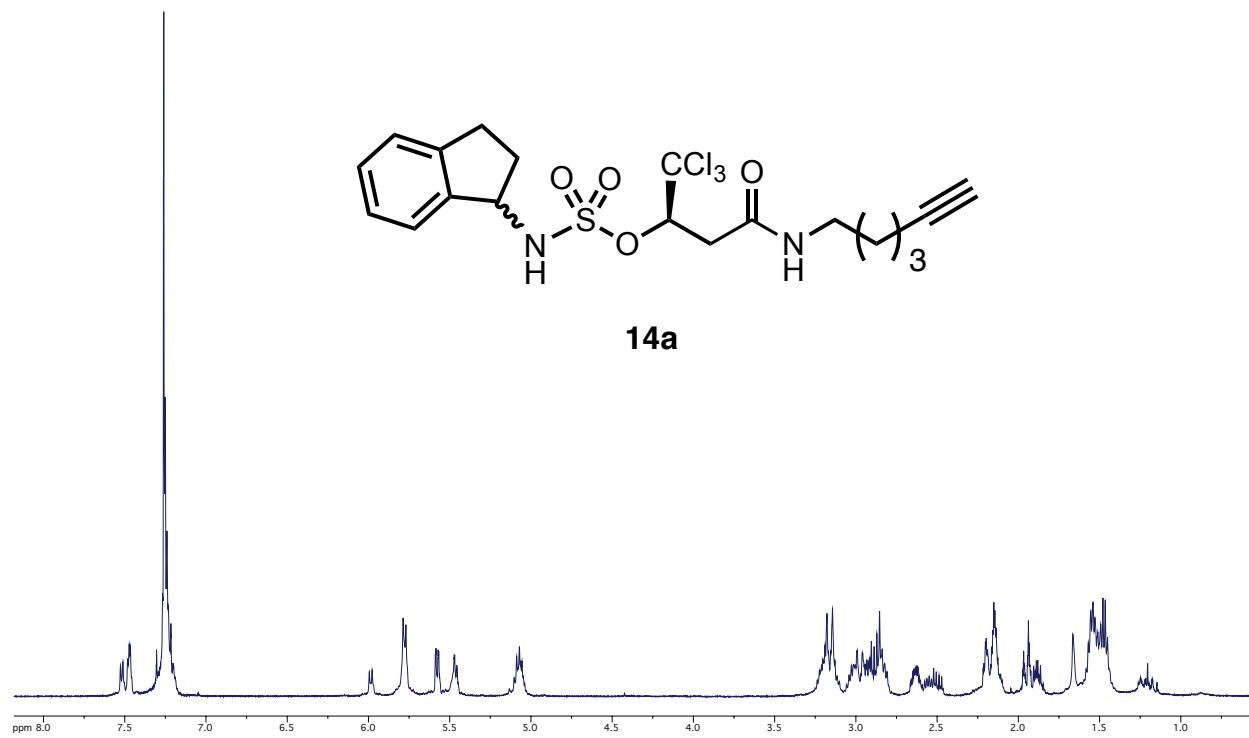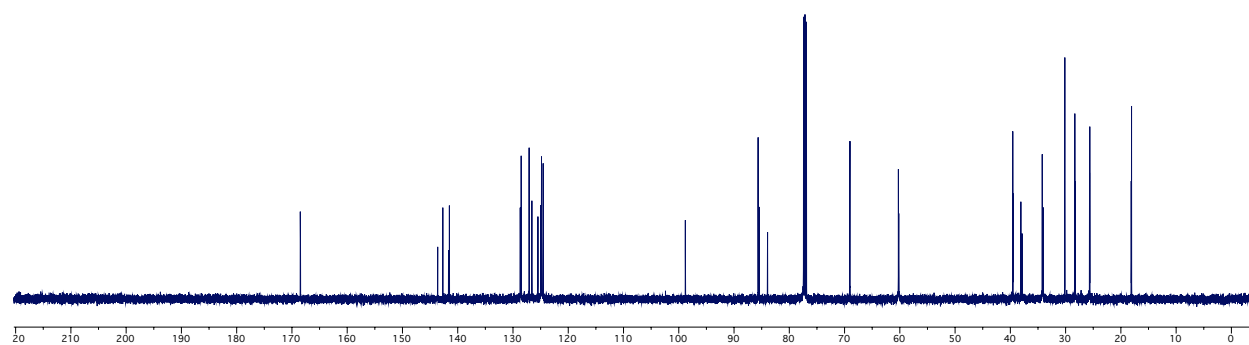

<sup>1</sup>H (500 MHz) and <sup>13</sup>C (125 MHz) NMR of **14a** (1.5:1 mixture of two diastereomers) in CDCl<sub>3</sub>

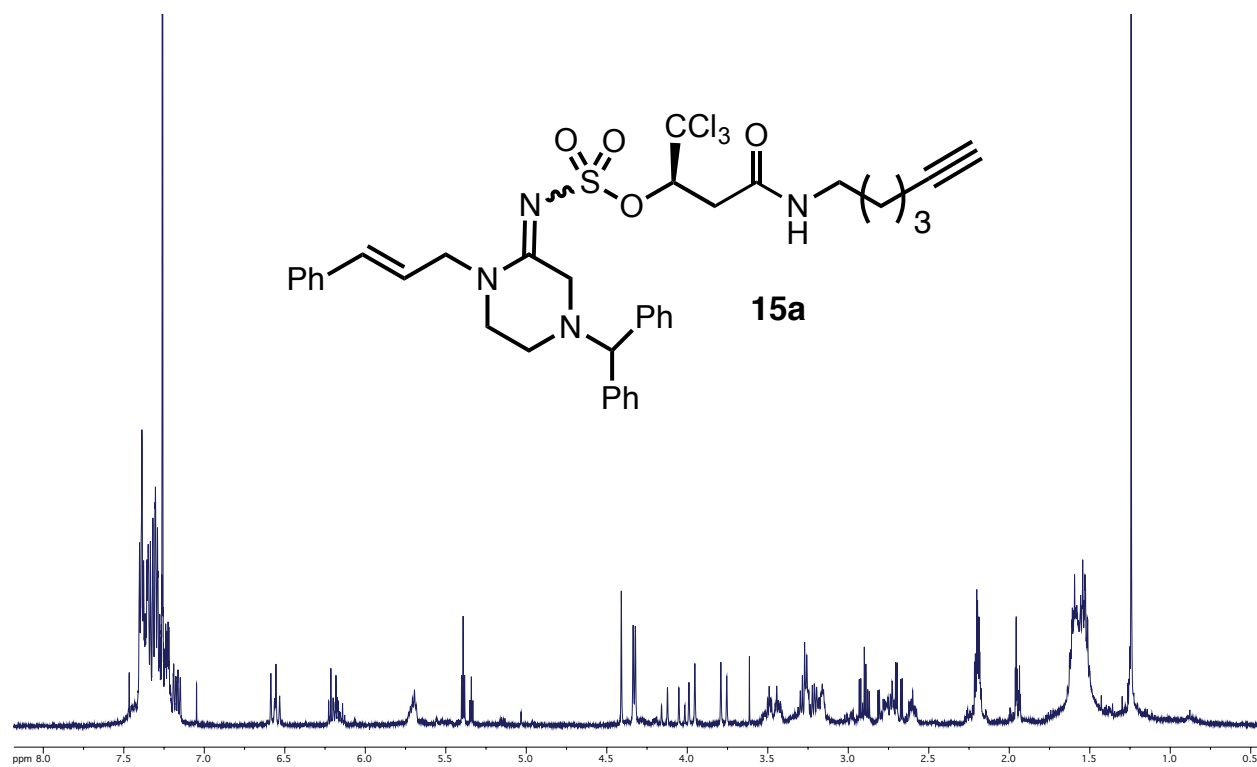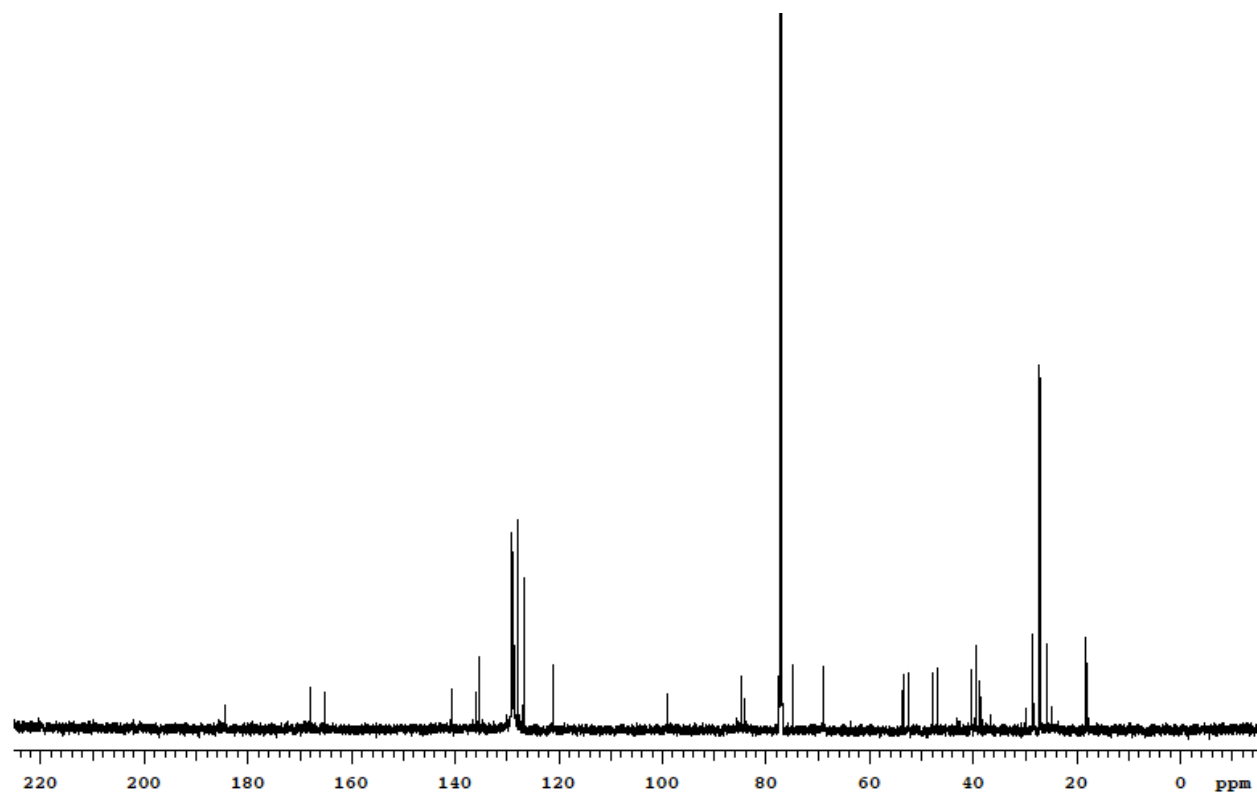

$^1\text{H}$  (500 MHz) and  $^{13}\text{C}$  (125 MHz) NMR of **15a** (2:1 mixture of E/Z isomers) in  $\text{CDCl}_3$



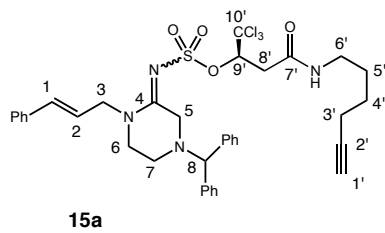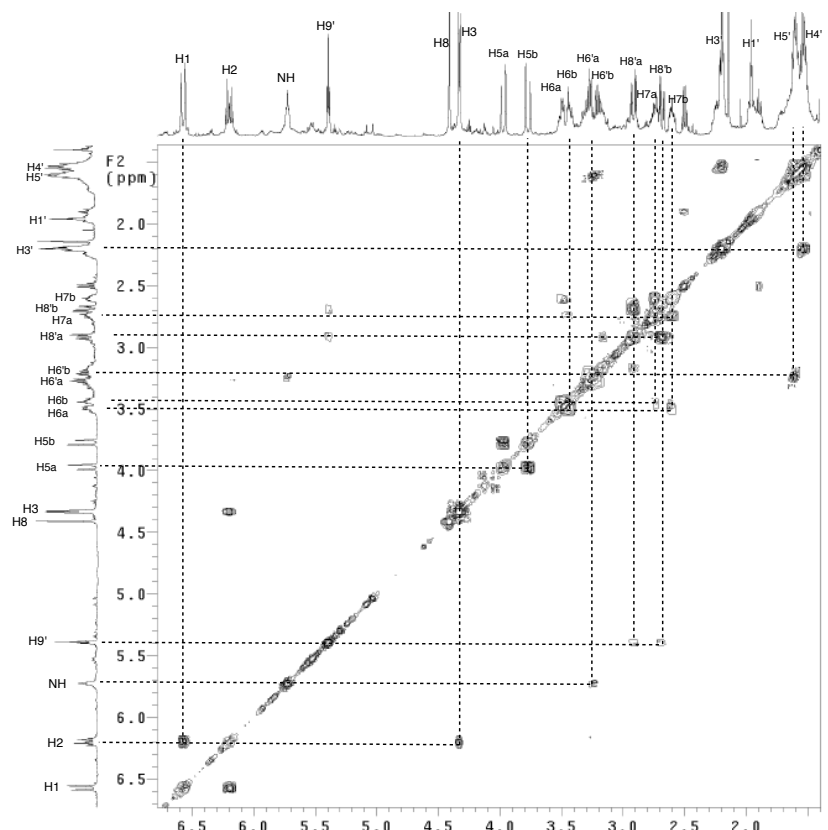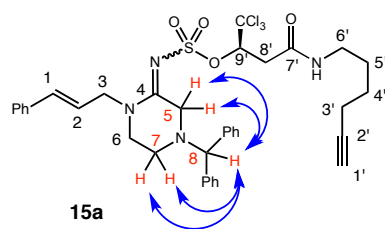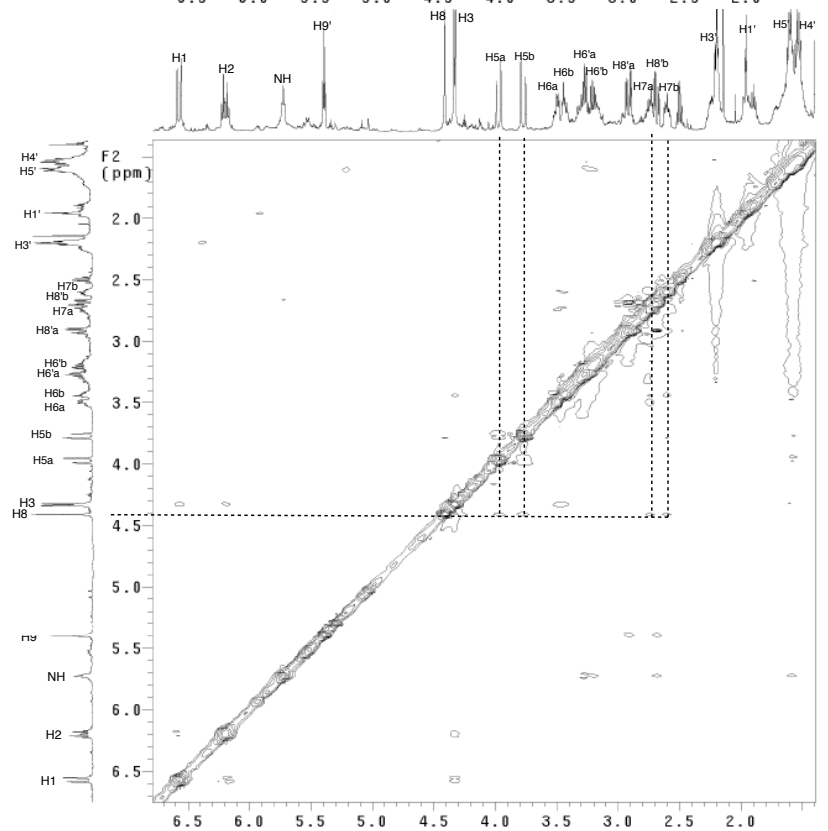

COSY and NOESY (500 MHz) NMR of **15a** in CDCl<sub>3</sub>

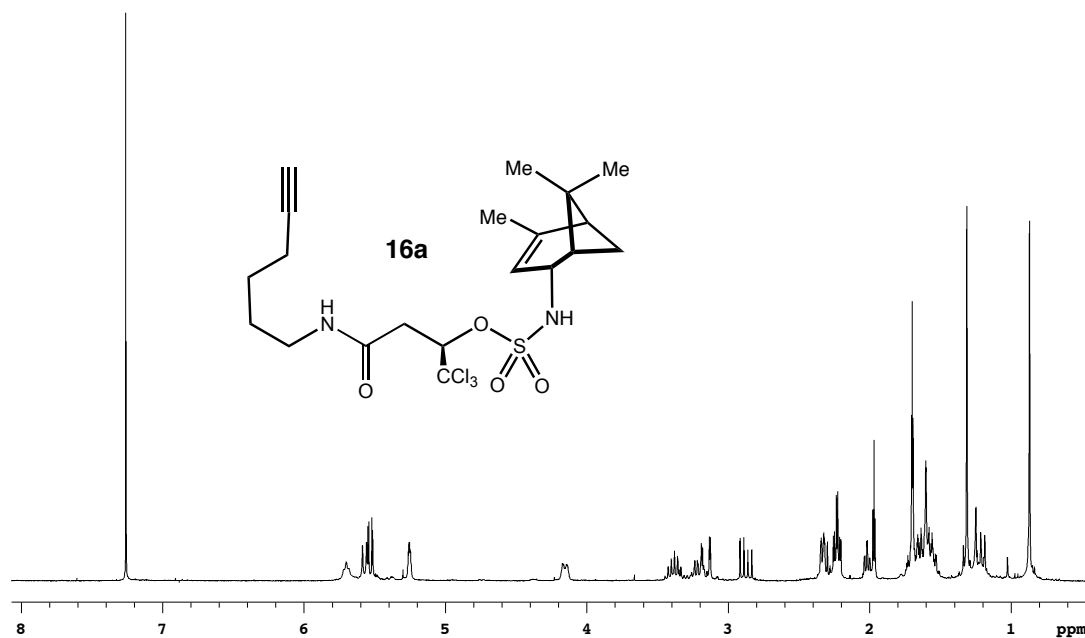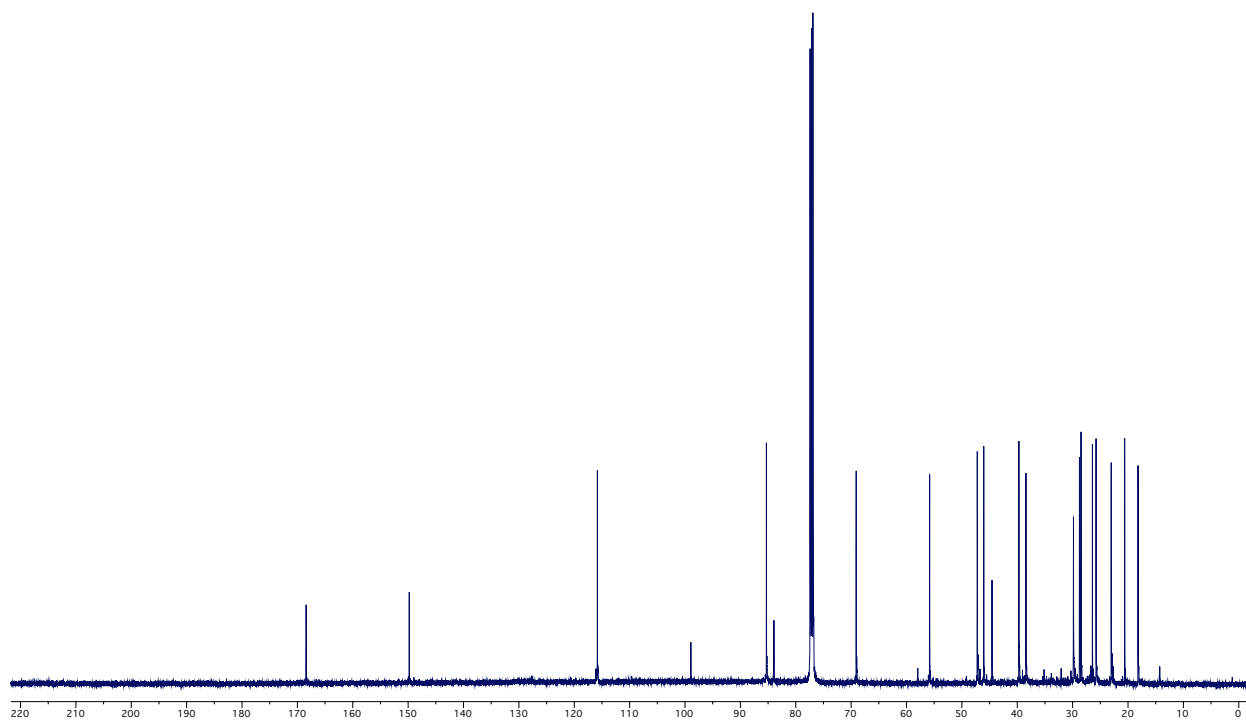

$^1\text{H}$  (500 MHz) and  $^{13}\text{C}$  (125 MHz) NMR of **16a** in  $\text{CDCl}_3$

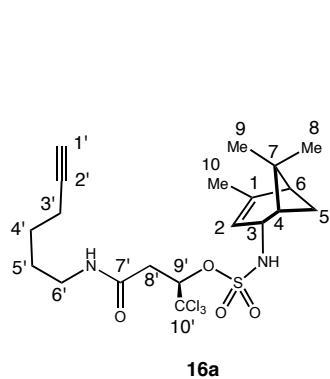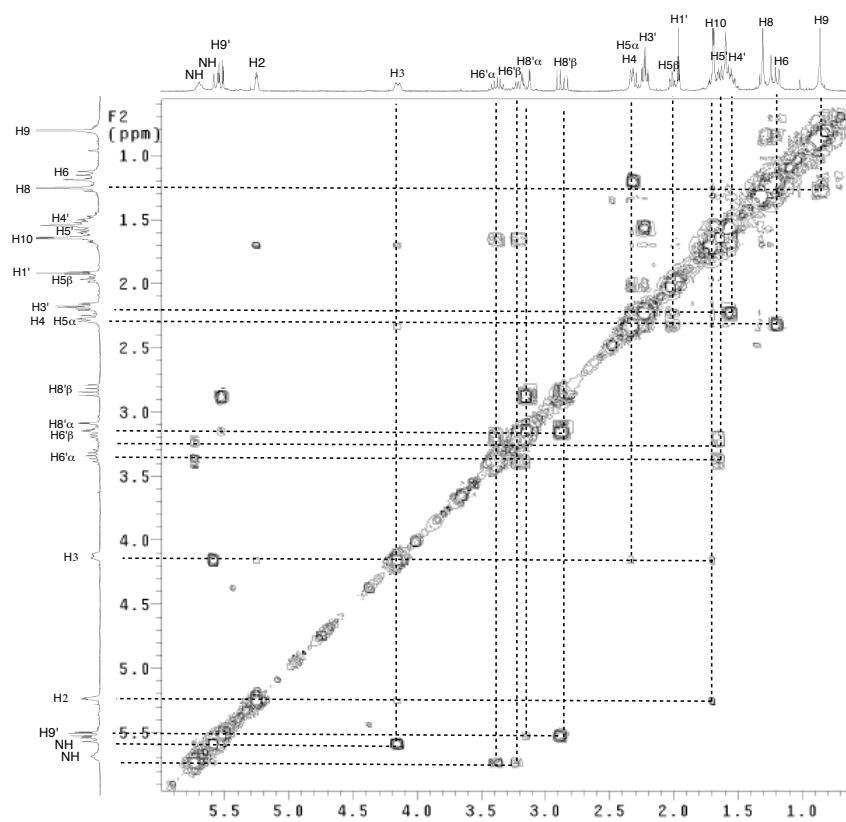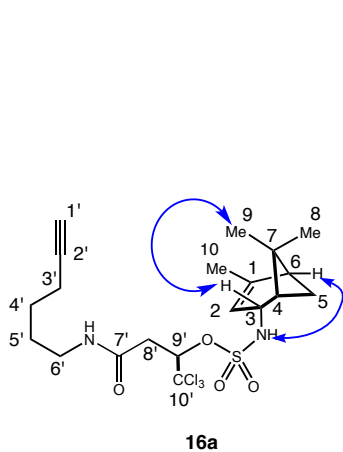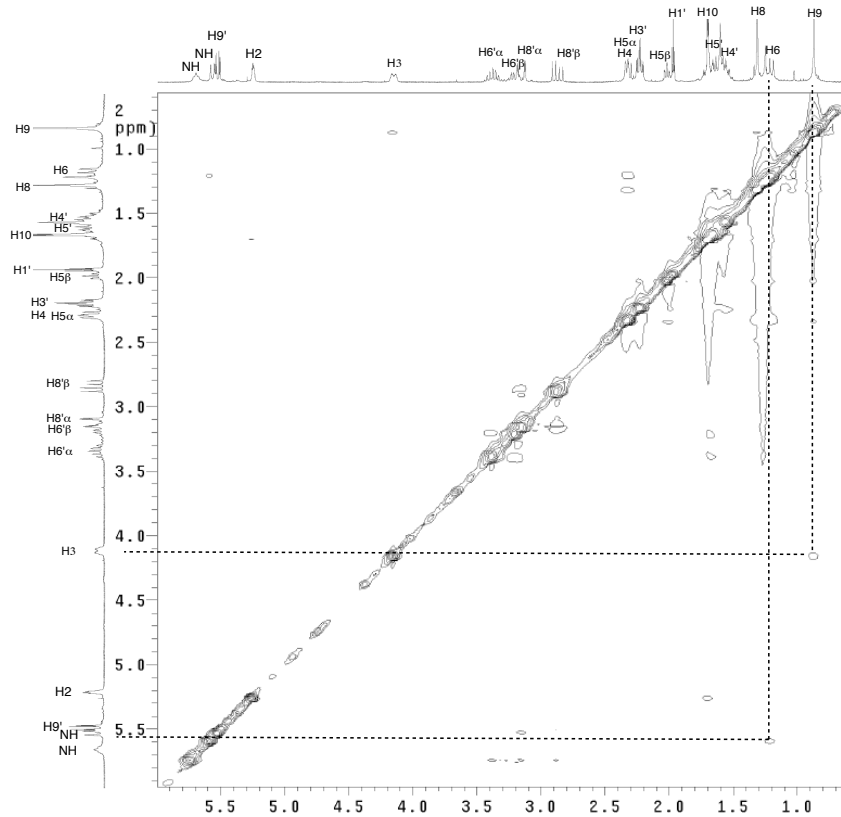

COSY and NOESY (500 MHz) NMR of **16a** in CDCl<sub>3</sub>

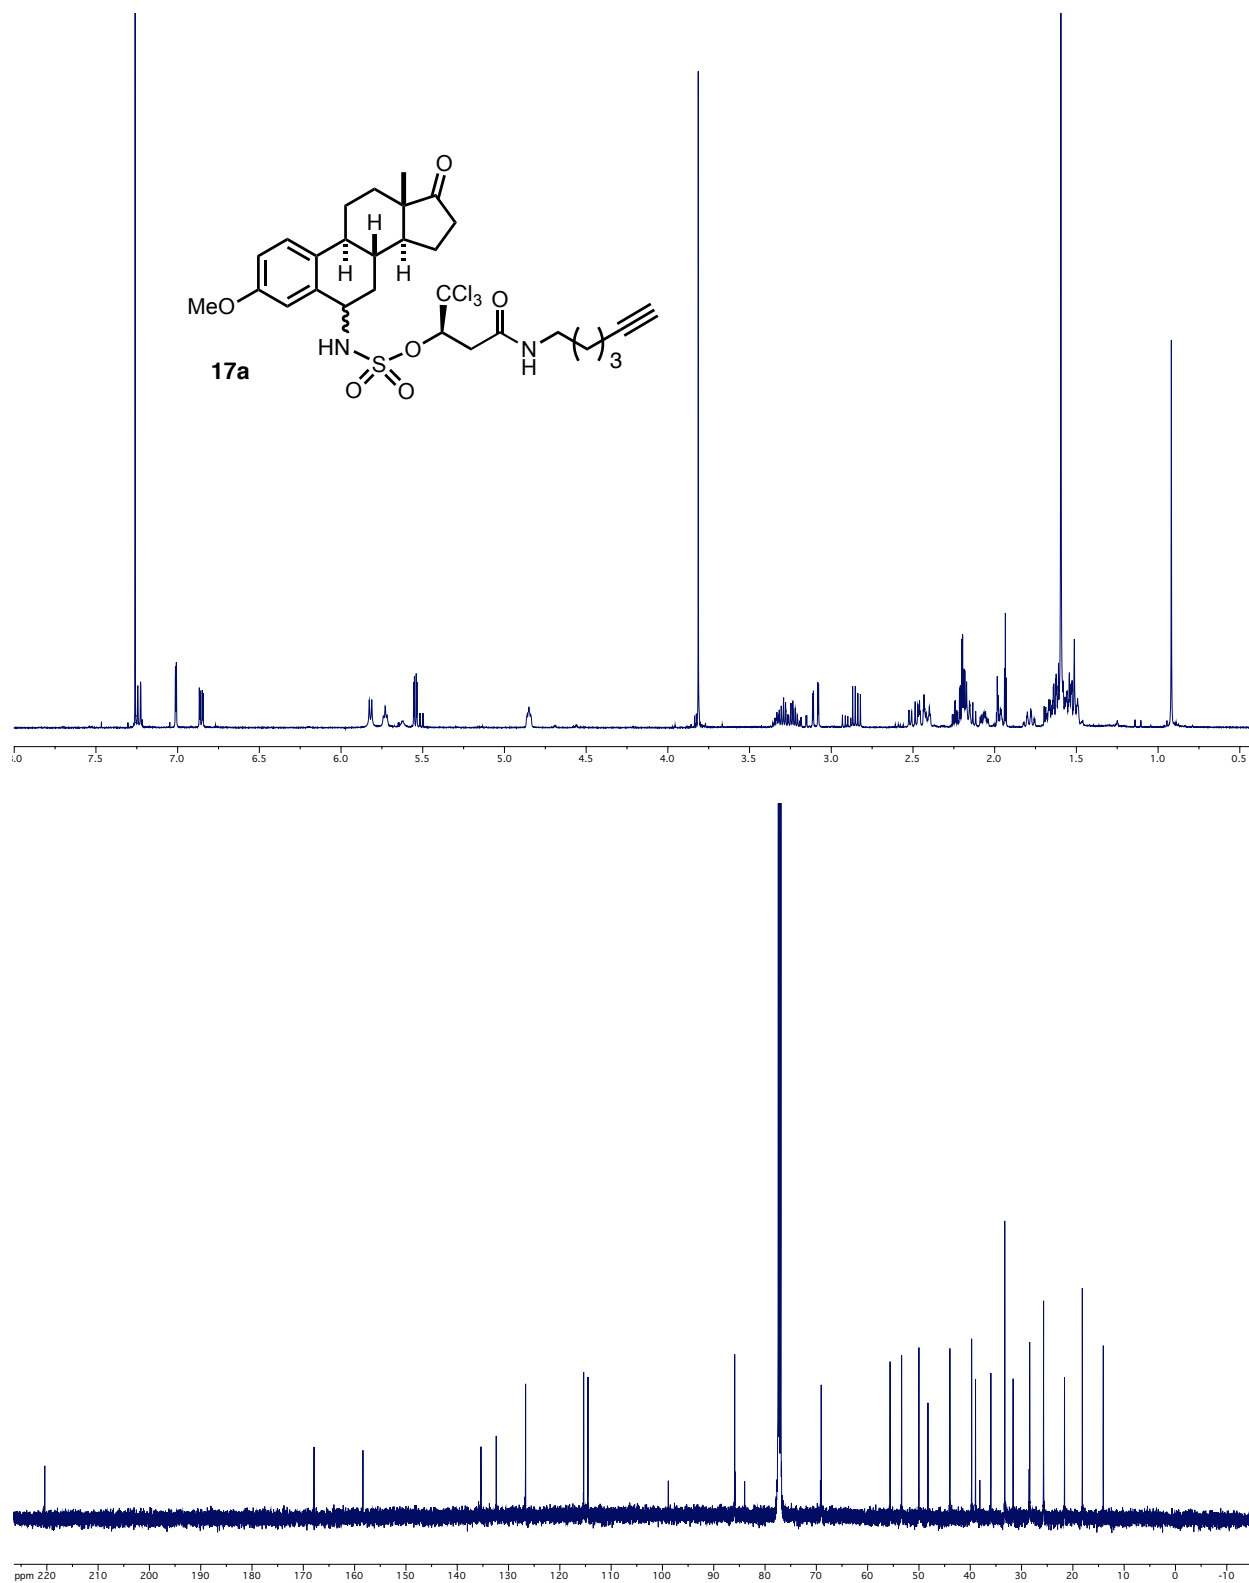

$^1\text{H}$  (500 MHz) and  $^{13}\text{C}$  (125 MHz) NMR of **17a** (4:1 mixture of diastereomers) in  $\text{CDCl}_3$

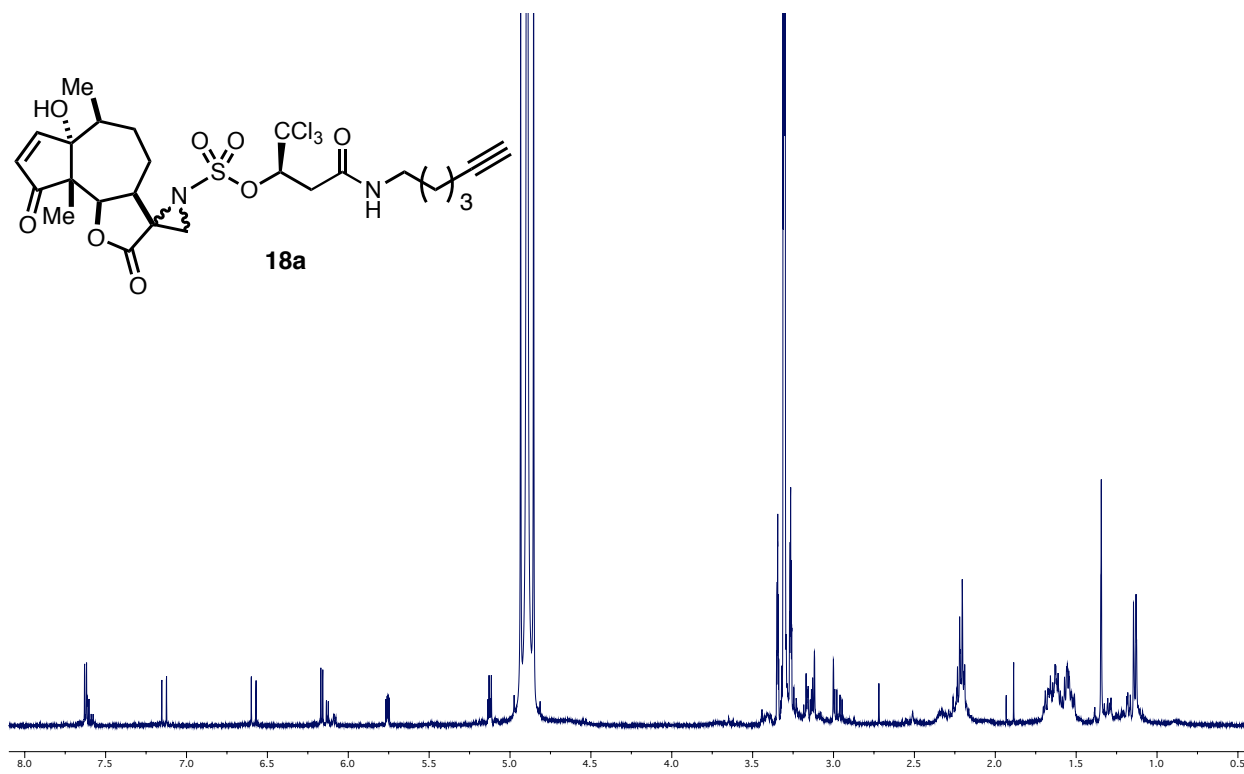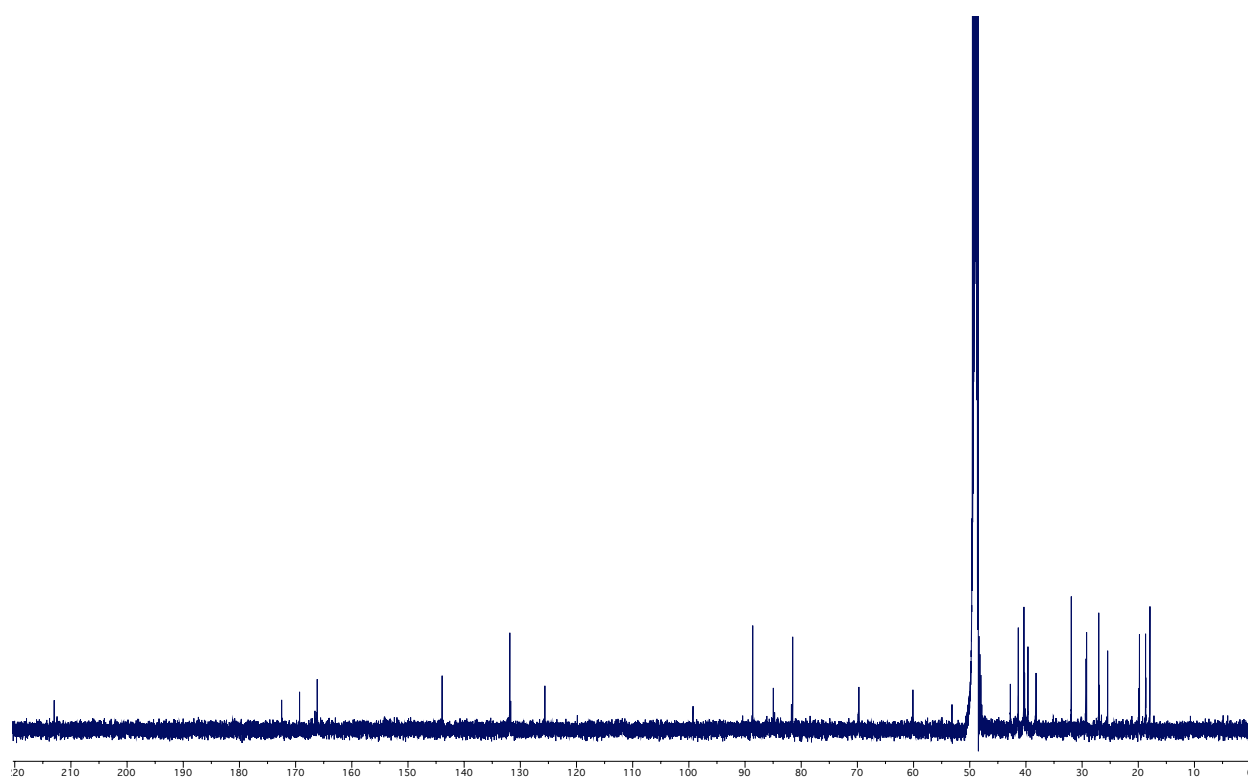

$^1\text{H}$  (500 MHz) and  $^{13}\text{C}$  (125 MHz) NMR of **18a** (one diastereomer) in  $\text{CD}_3\text{OD}$

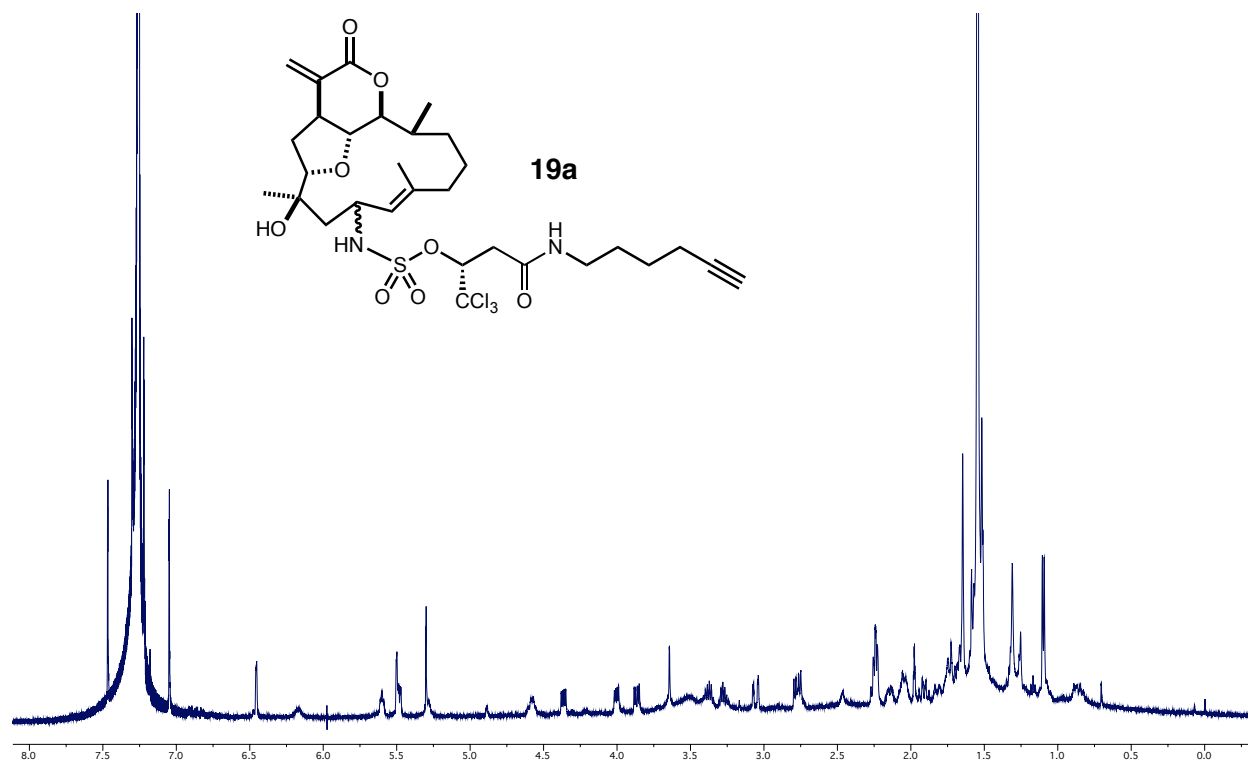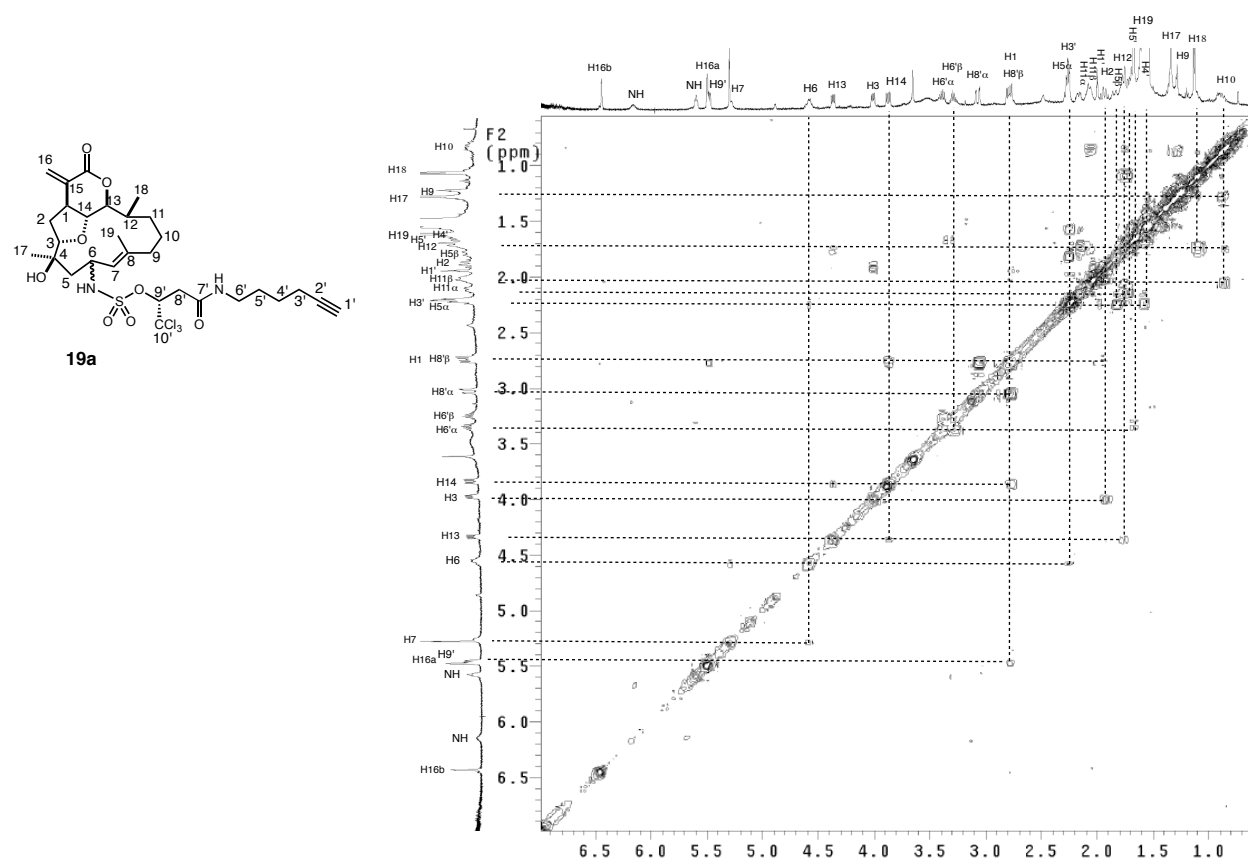

$^1\text{H}$  (500 MHz) and COSY NMR of **19a** (one diastereomer) in  $\text{CDCl}_3$

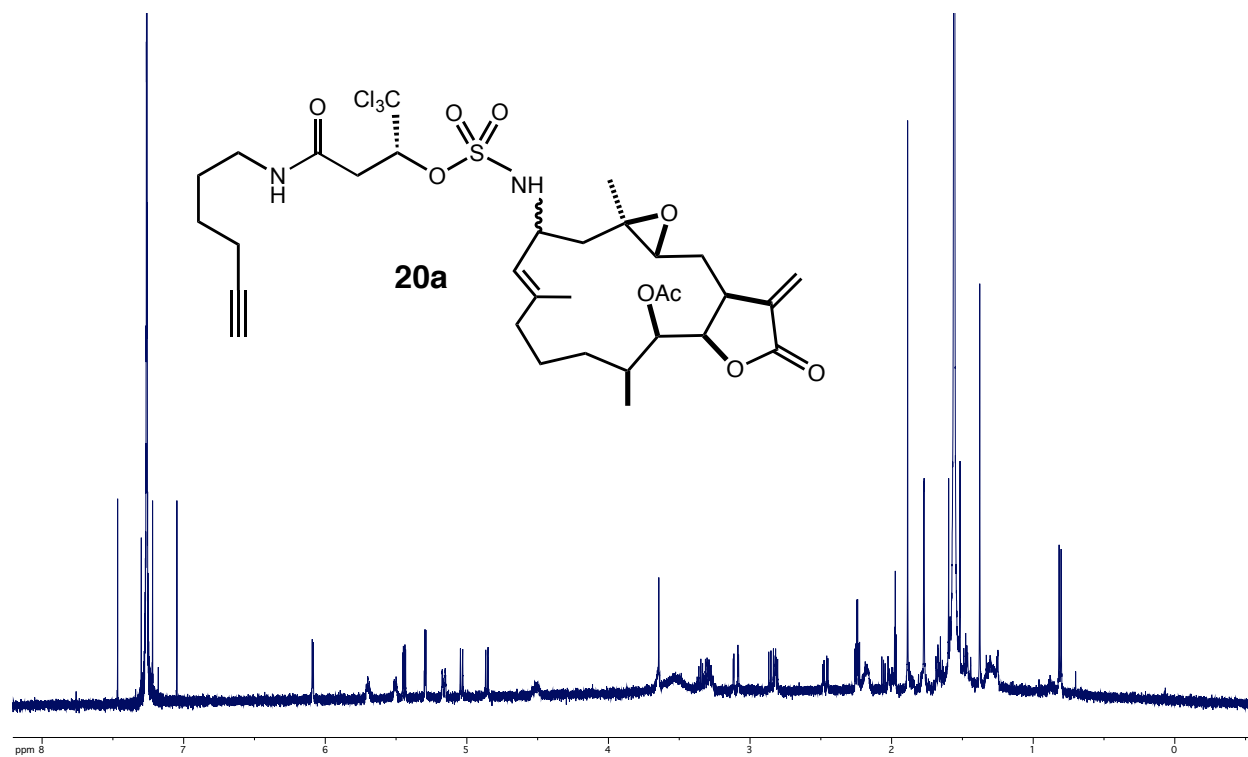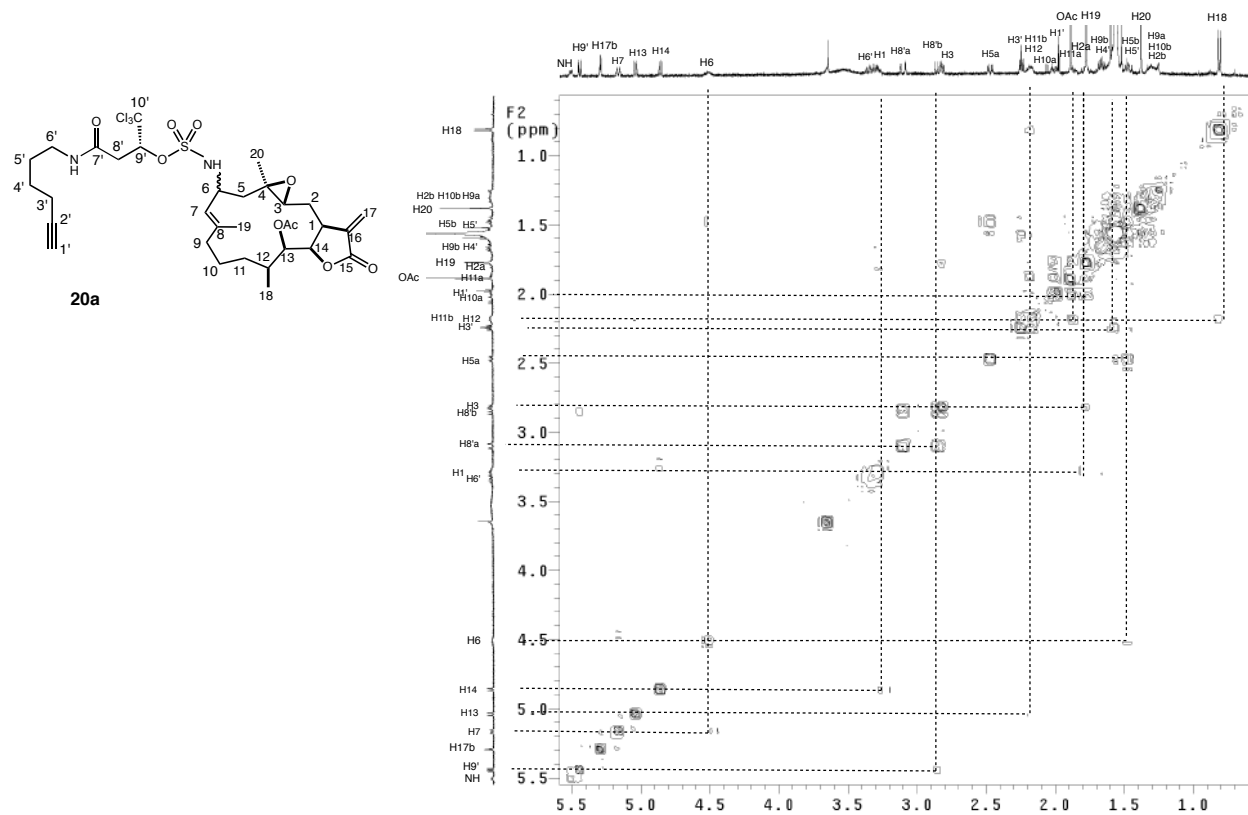

$^1\text{H}$  (500 MHz) and COSY NMR of **20a** (one diastereomer) in  $\text{CDCl}_3$

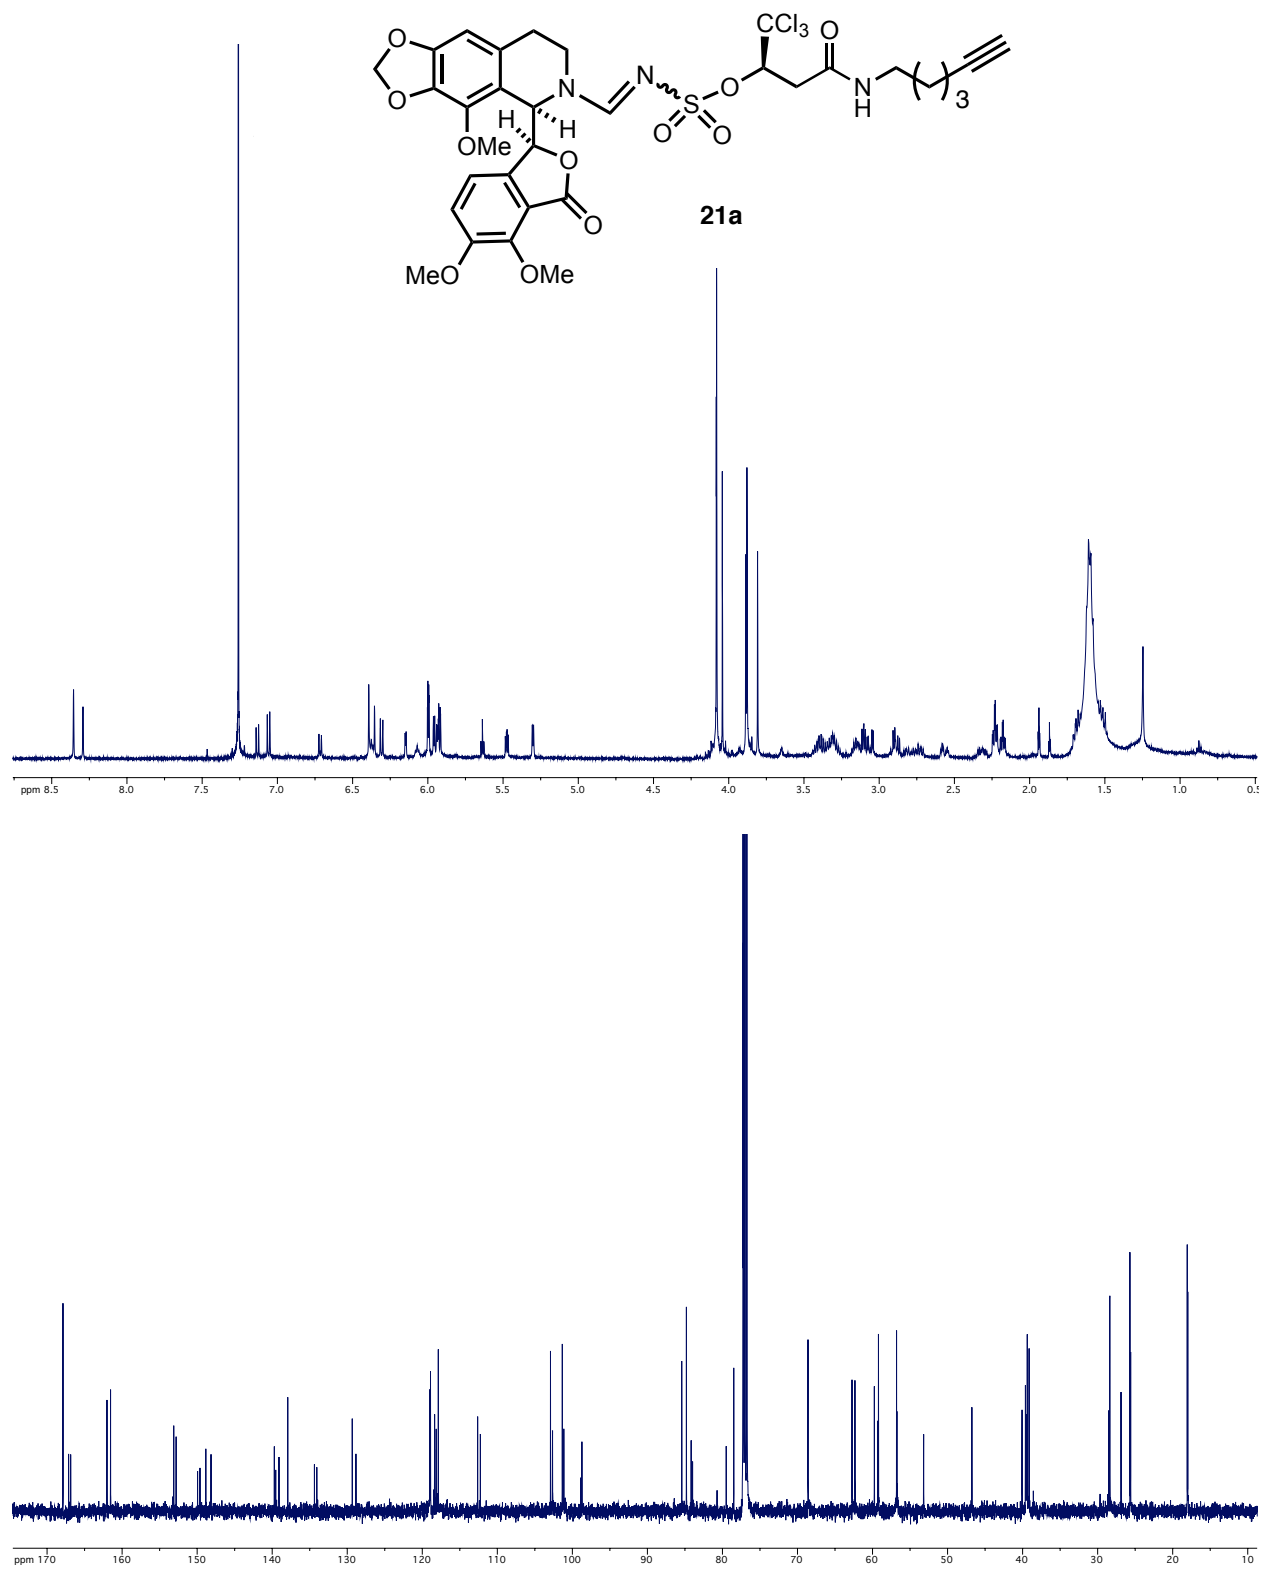

$^1\text{H}$  (500 MHz) and  $^{13}\text{C}$  (125 MHz) NMR of **21a** (1.3:1 mixture of E/Z isomers) in  $\text{CDCl}_3$



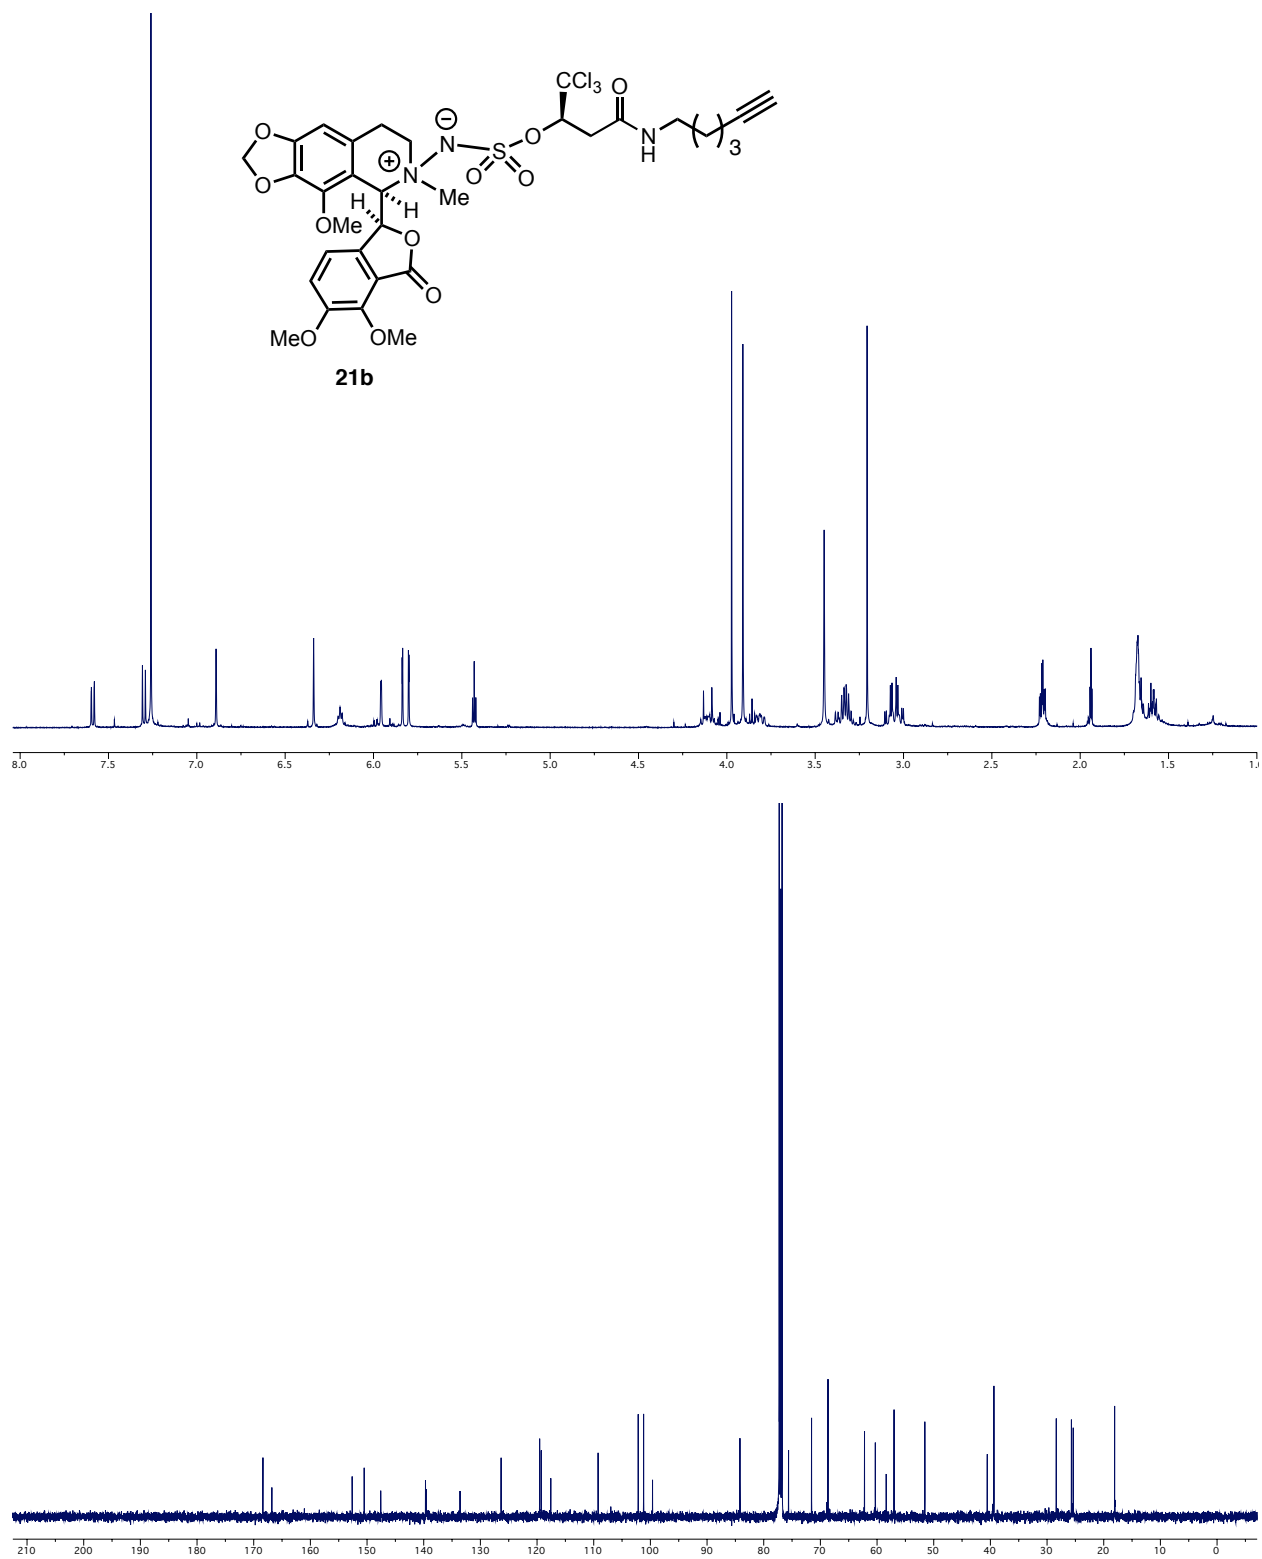

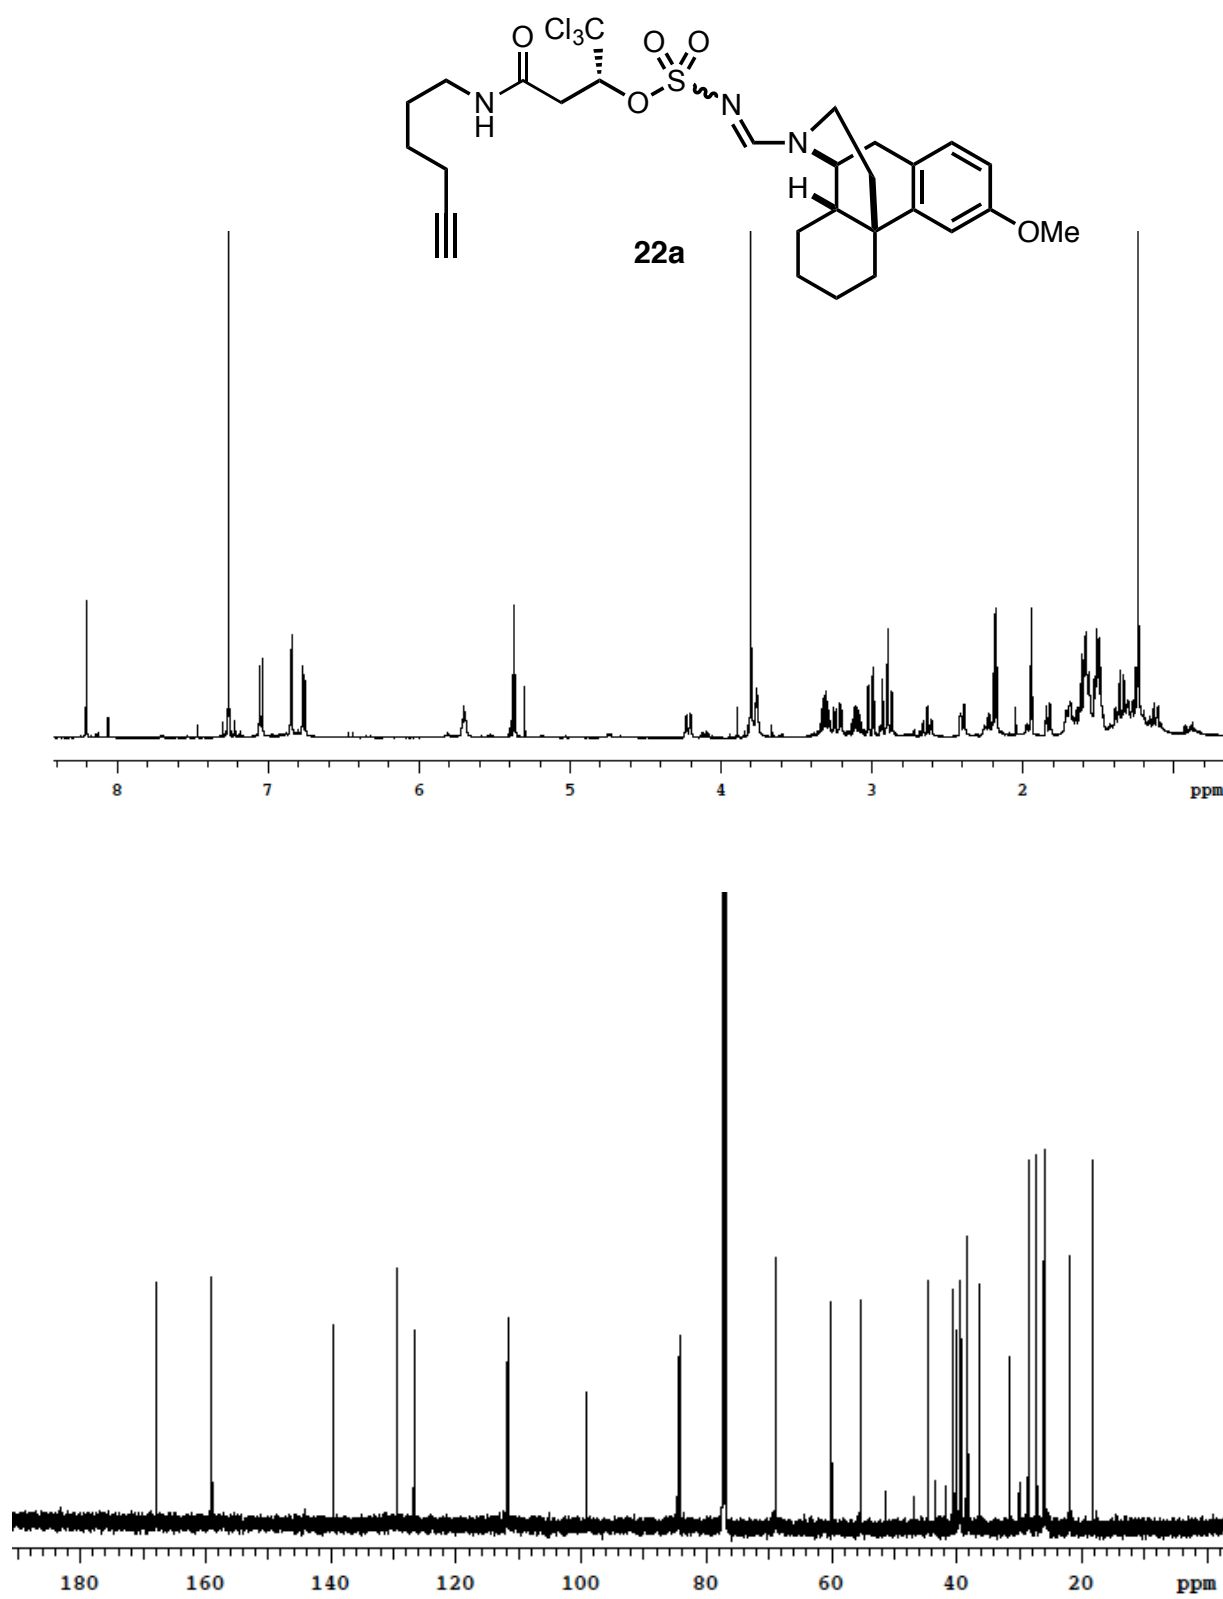

$^1\text{H}$  (500 MHz) and  $^{13}\text{C}$  (125 MHz) NMR of **22a** (major diastereomer) in  $\text{CDCl}_3$

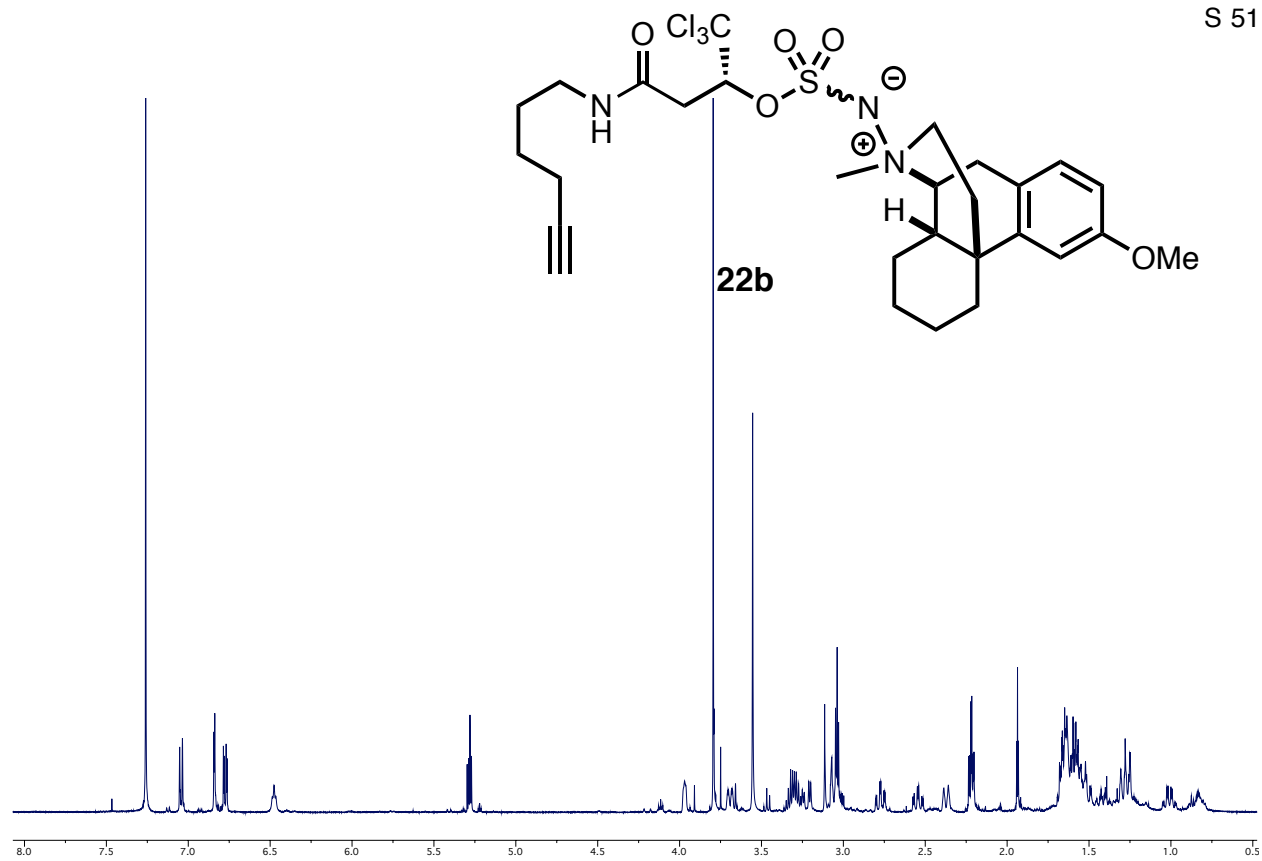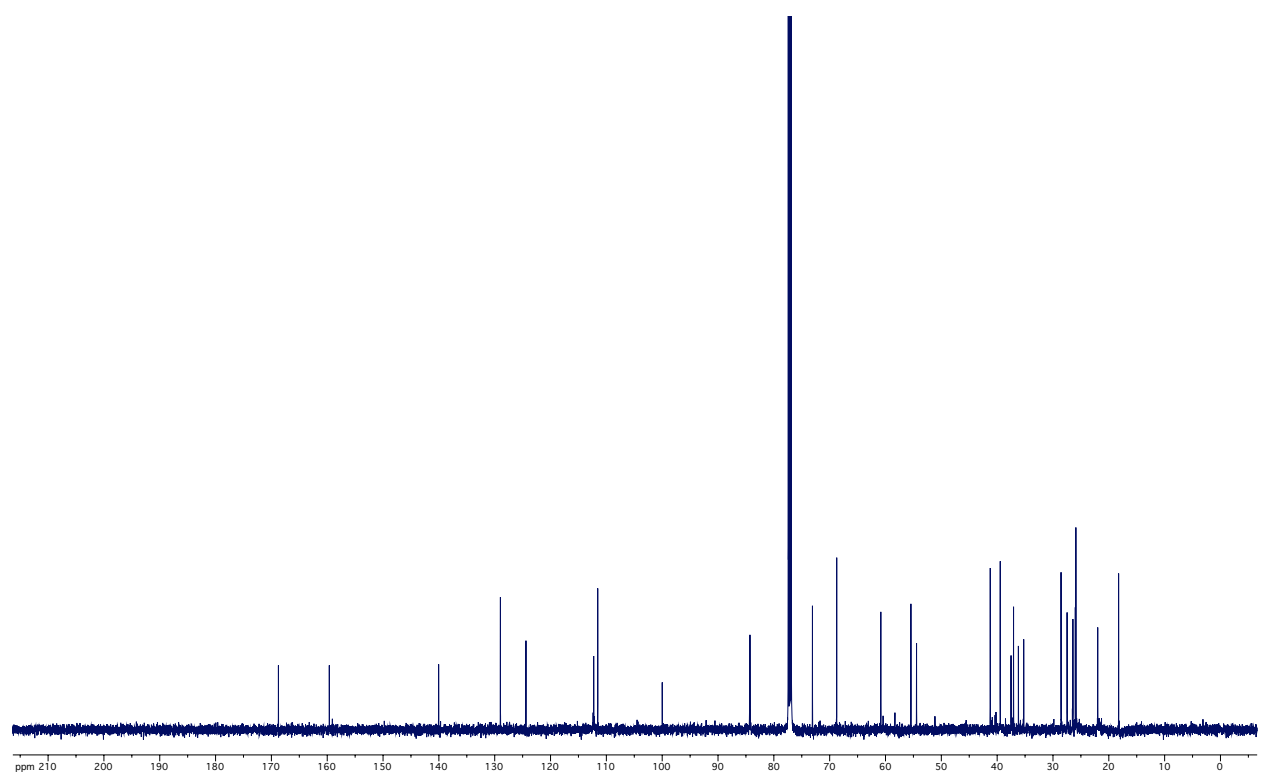

$^1\text{H}$  (500 MHz) and  $^{13}\text{C}$  (125 MHz) NMR of **22b** in  $\text{CDCl}_3$

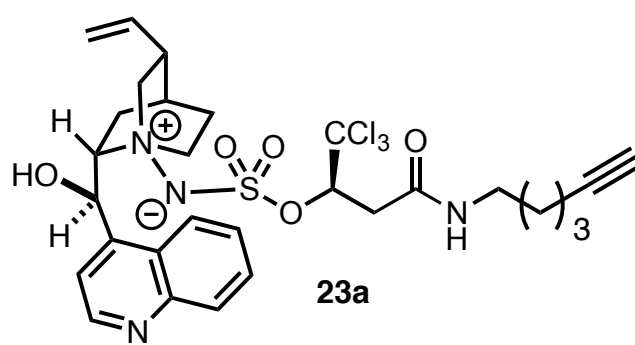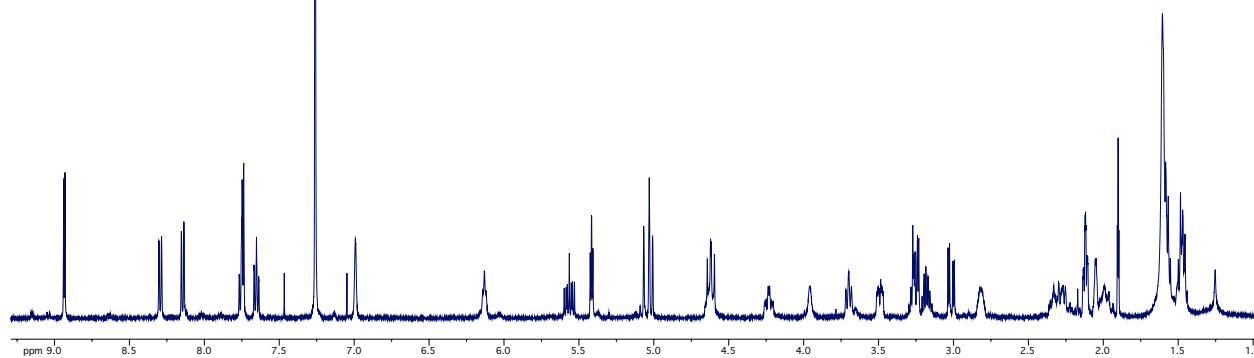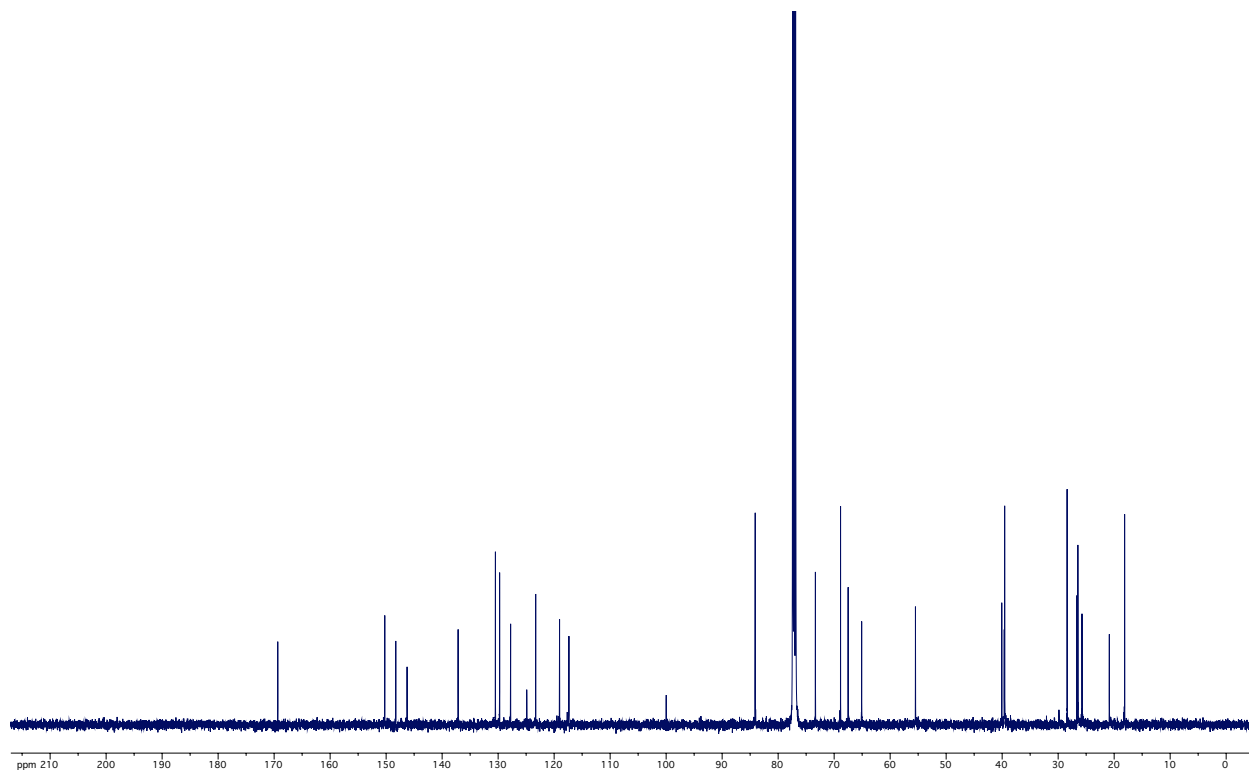

<sup>1</sup>H (500 MHz) and <sup>13</sup>C (125 MHz) NMR of **23a** in CDCl<sub>3</sub>

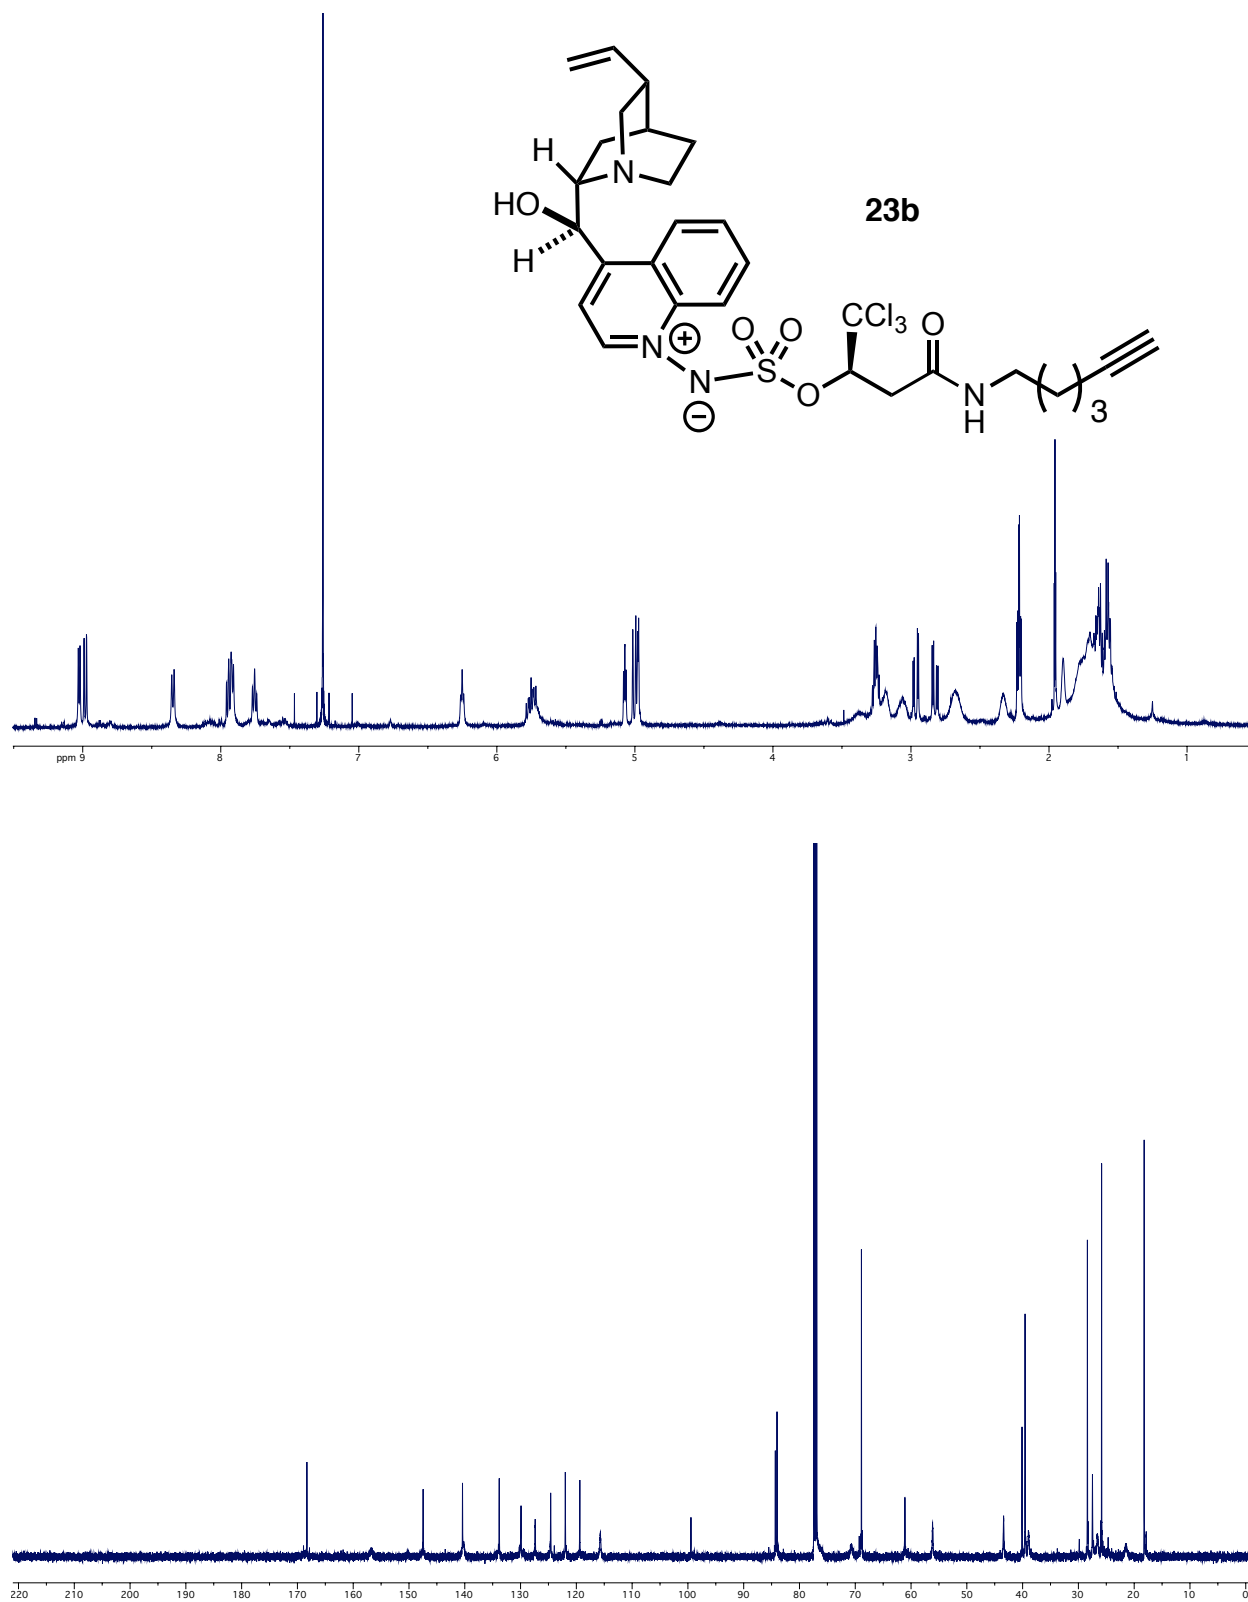

$^1\text{H}$  (500 MHz) and  $^{13}\text{C}$  (125 MHz) NMR of **23b** in  $\text{CDCl}_3$

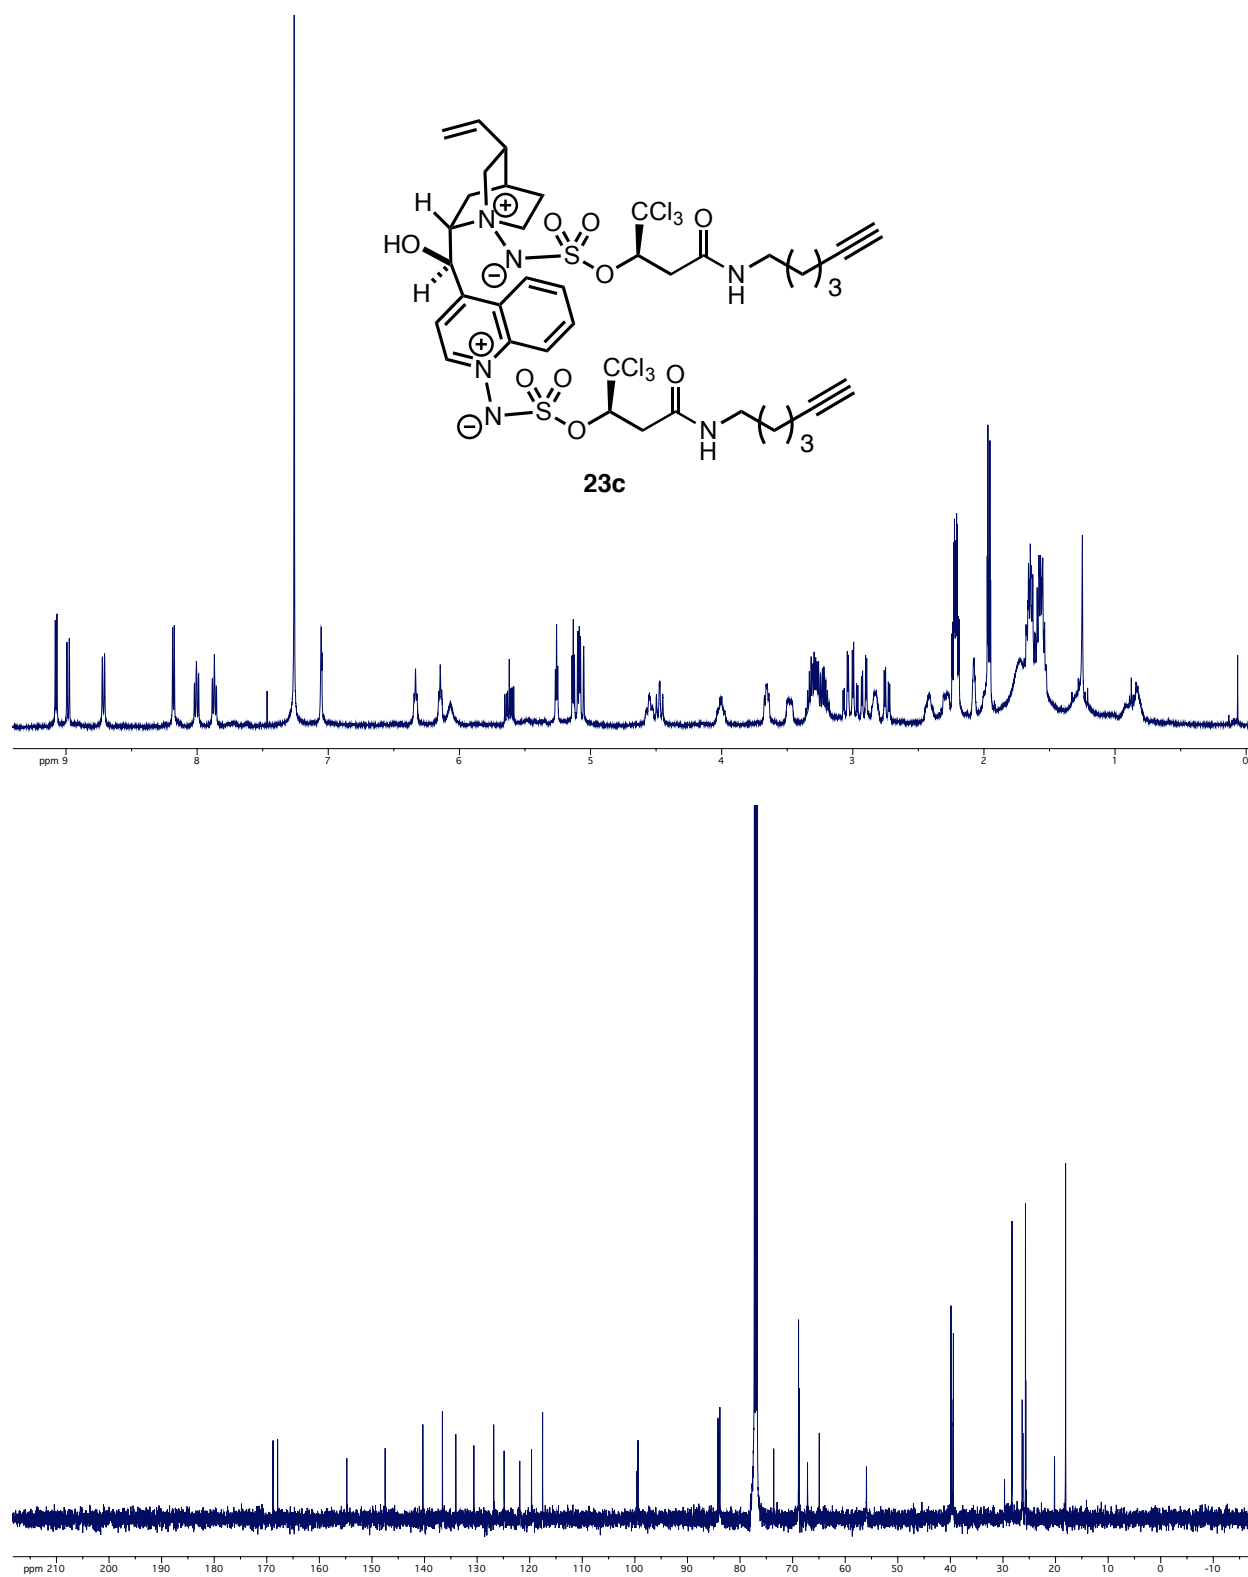

$^1\text{H}$  (500 MHz) and  $^{13}\text{C}$  (125 MHz) NMR of **23c** in CDCl<sub>3</sub>

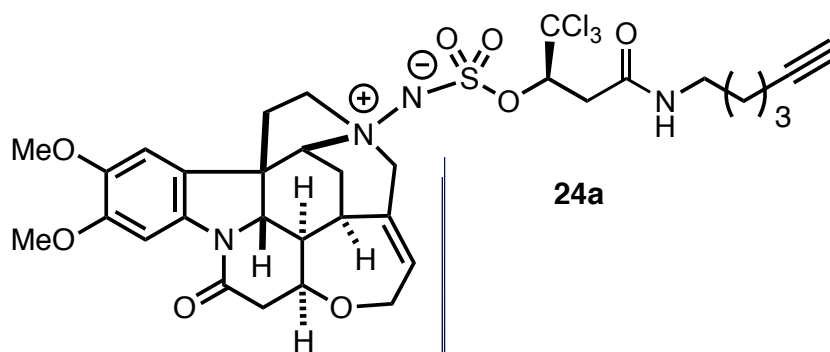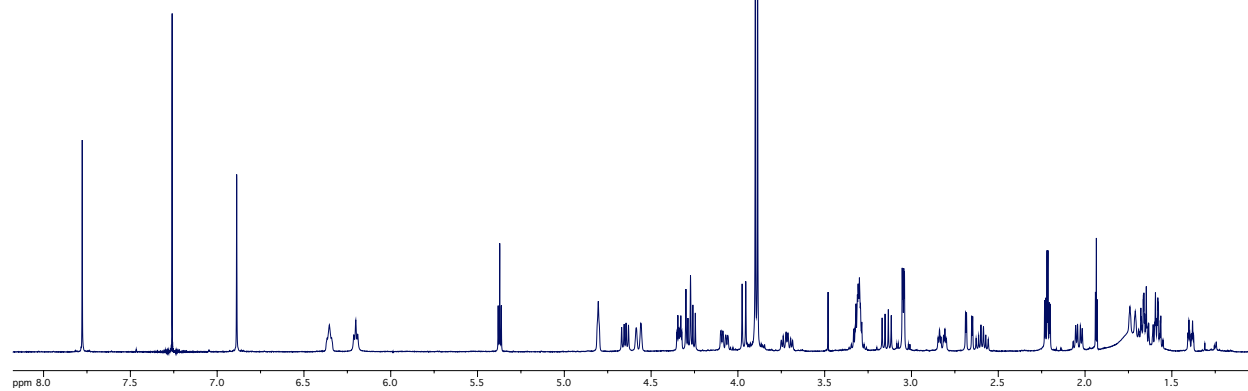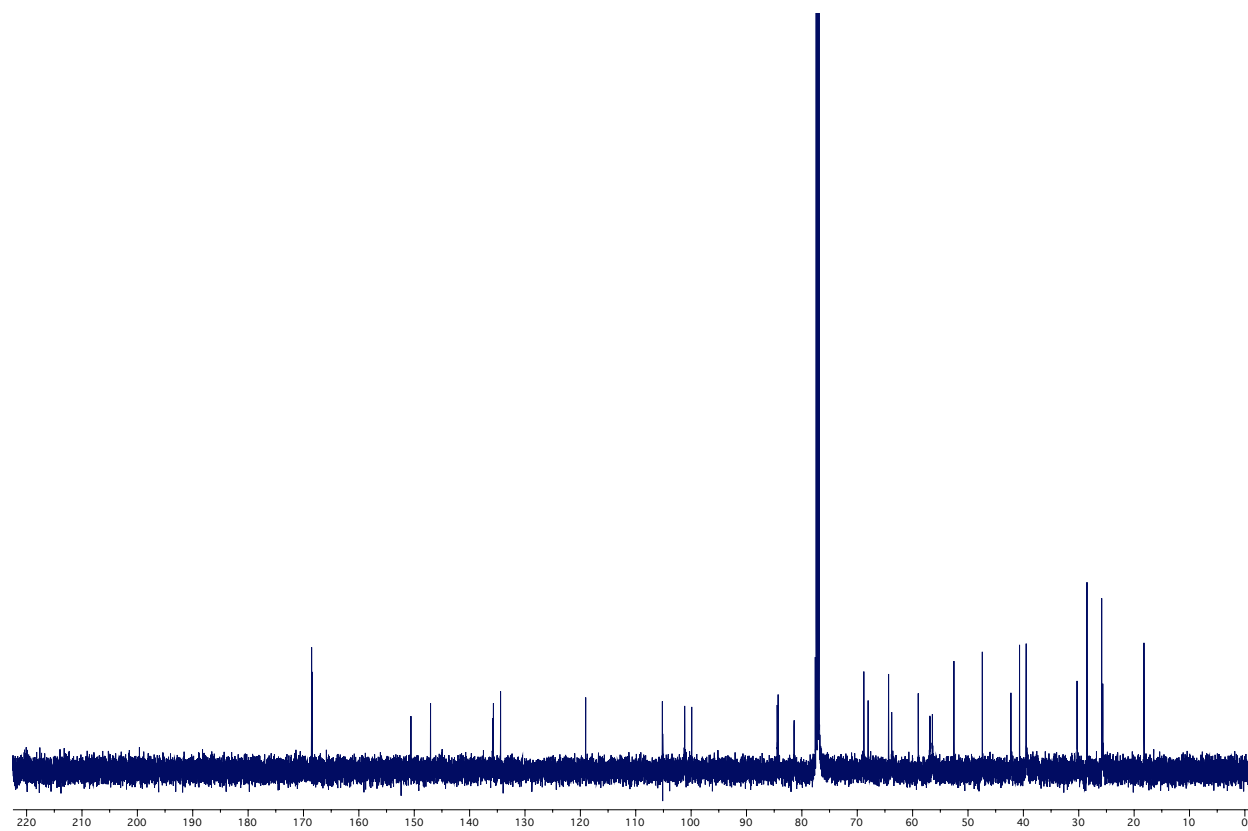

<sup>1</sup>H (500 MHz) and <sup>13</sup>C (125 MHz) NMR of **24a** in CDCl<sub>3</sub>

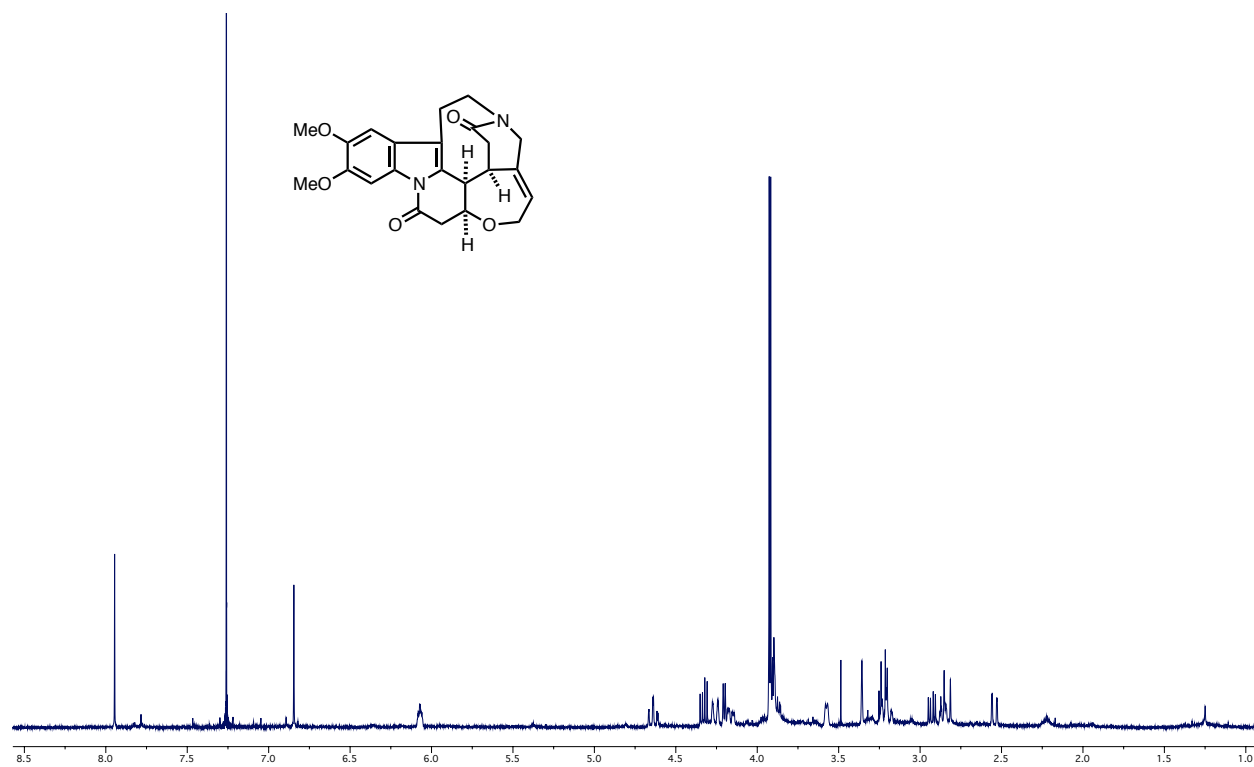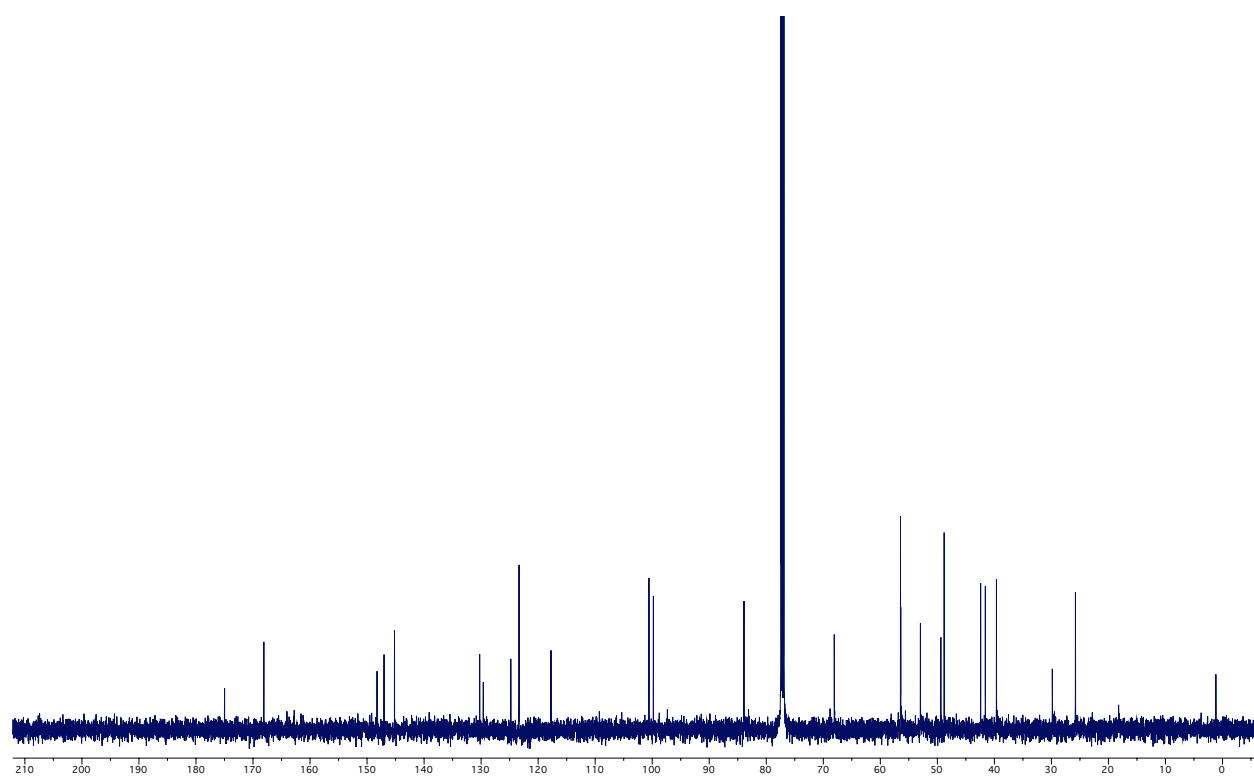

$^1\text{H}$  (500 MHz) and  $^{13}\text{C}$  (125 MHz) NMR of **24b** in  $\text{CDCl}_3$



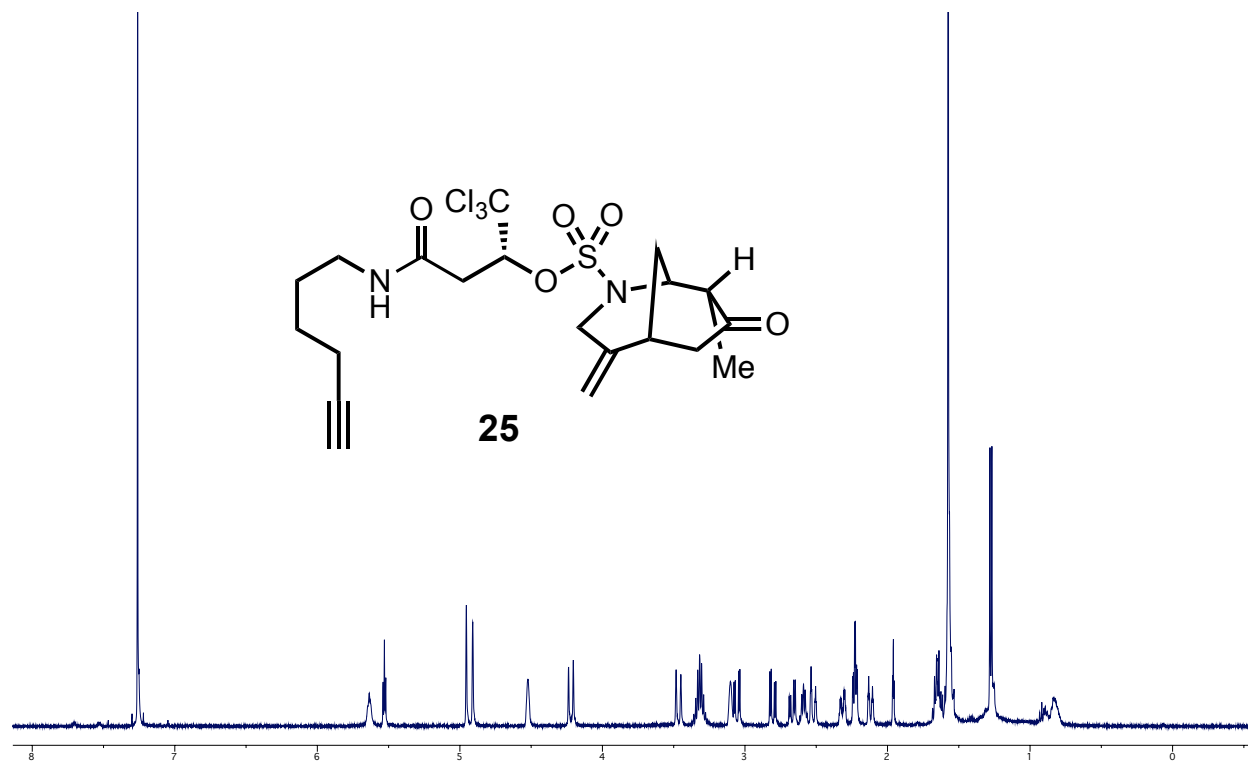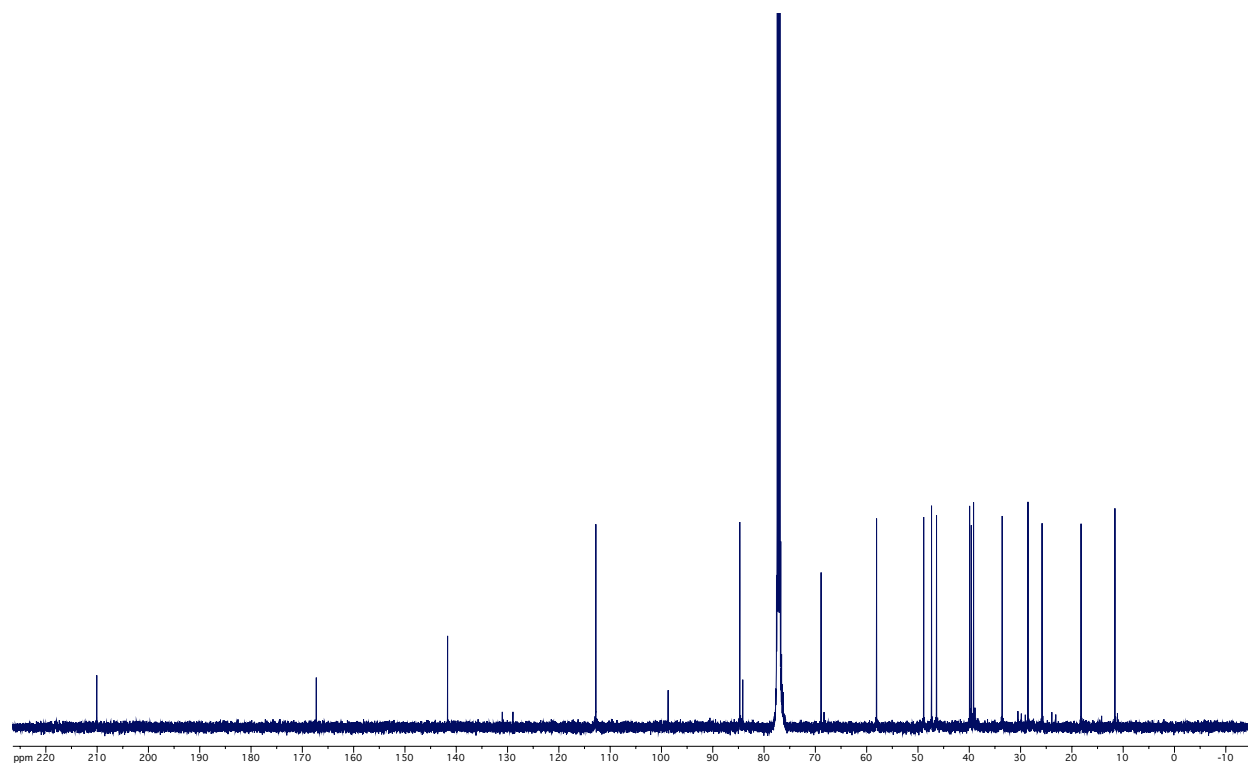

$^1\text{H}$  (500 MHz) and  $^{13}\text{C}$  (125 MHz) NMR of **25** in  $\text{CDCl}_3$

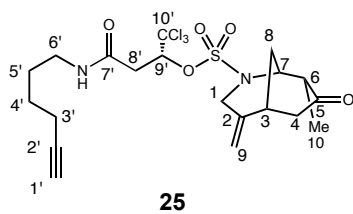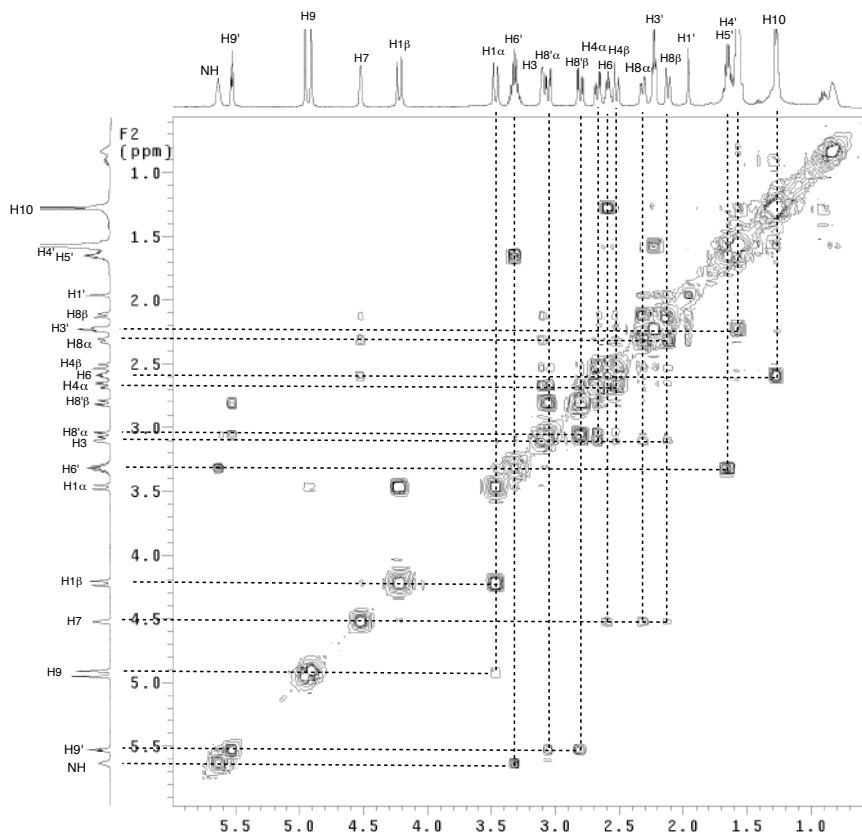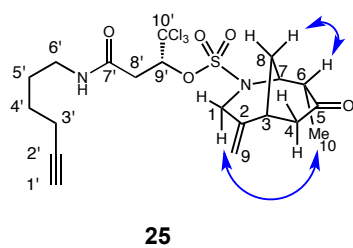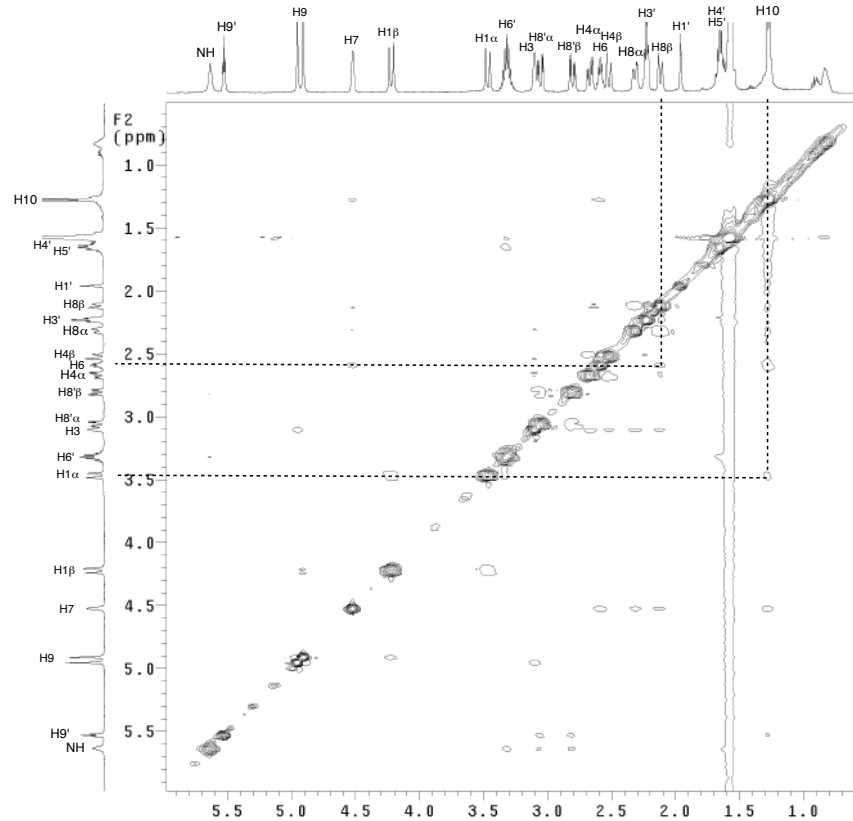

COSY and NOESY (500 MHz) NMR of **25** in CDCl<sub>3</sub>

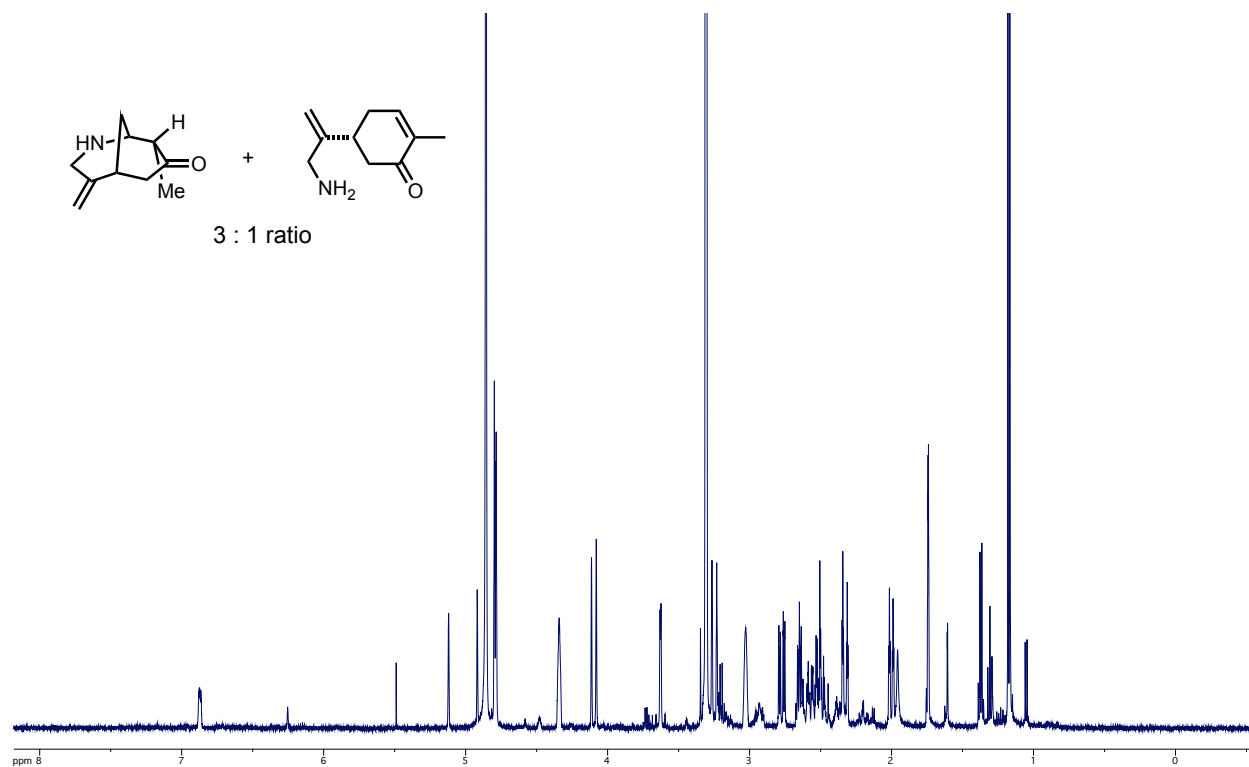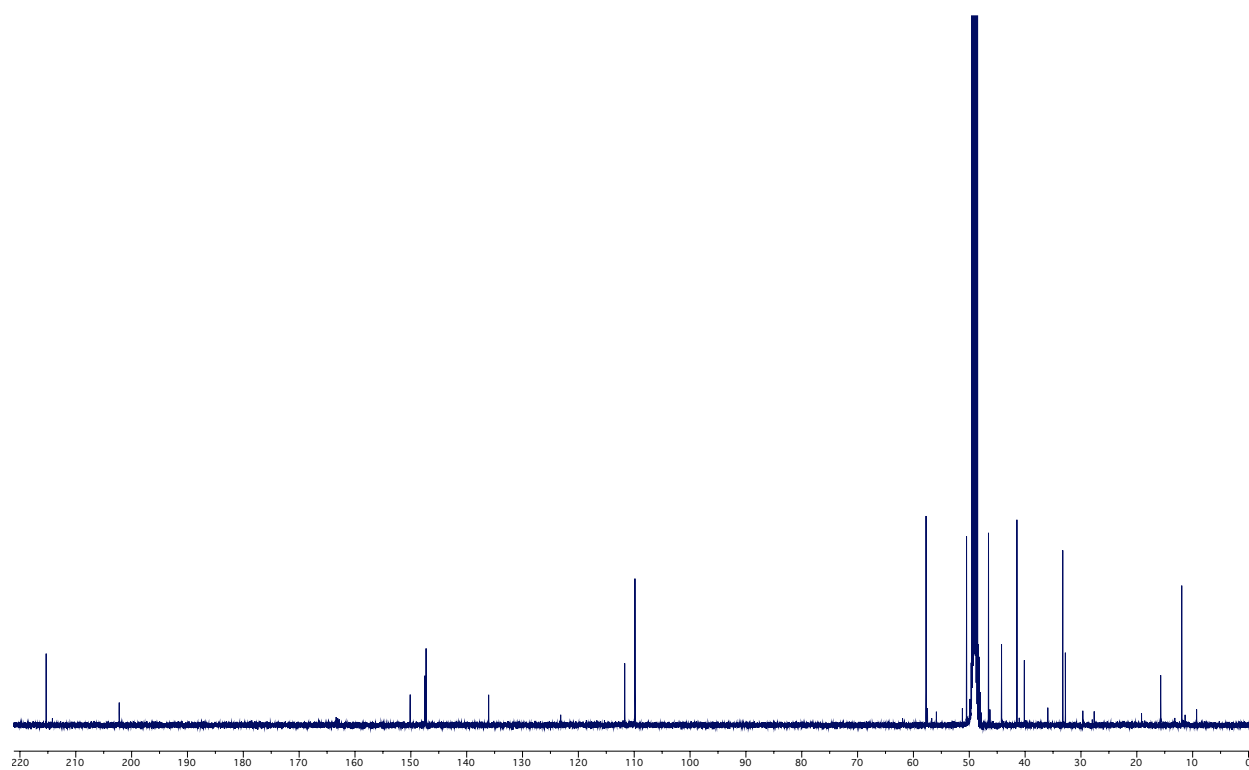

$^1\text{H}$  (500 MHz) and  $^{13}\text{C}$  (125 MHz) NMR of **26/27** (3:1 ratio) in  $\text{CD}_3\text{OD}$

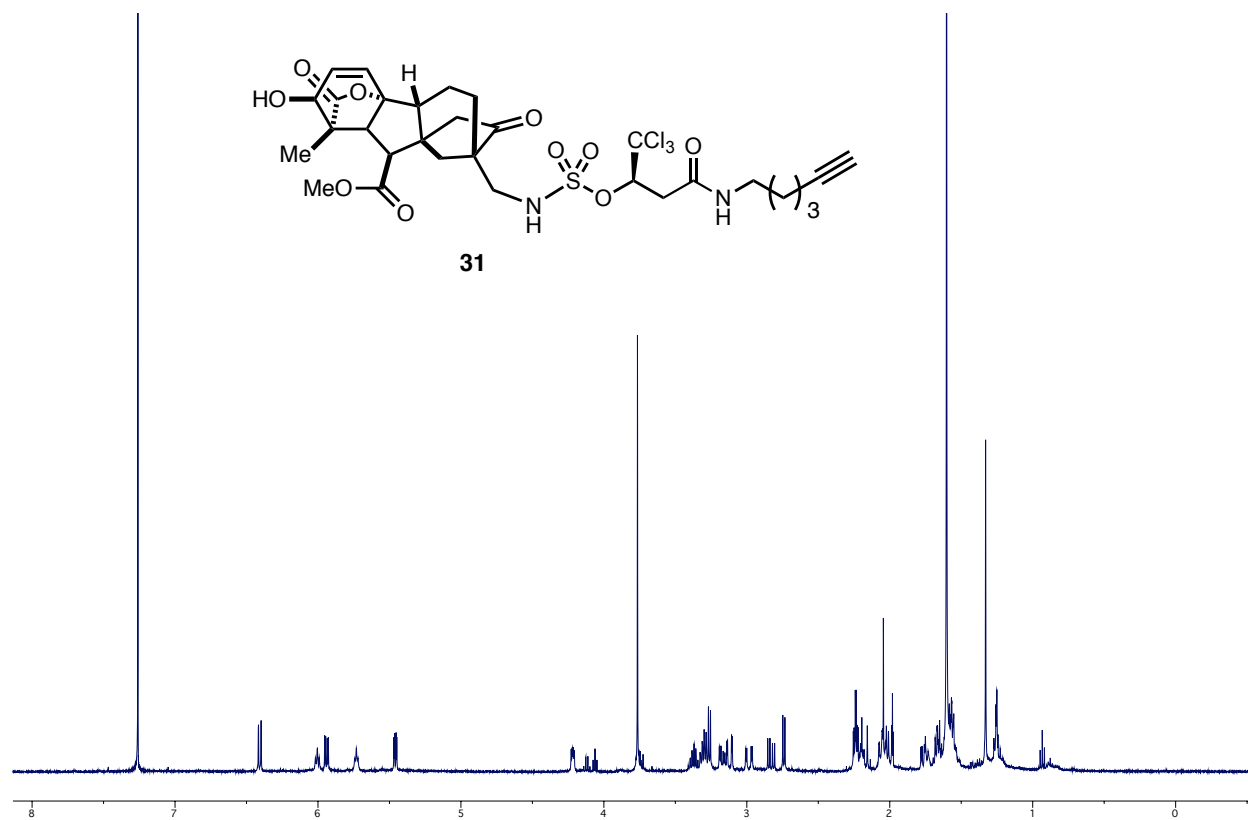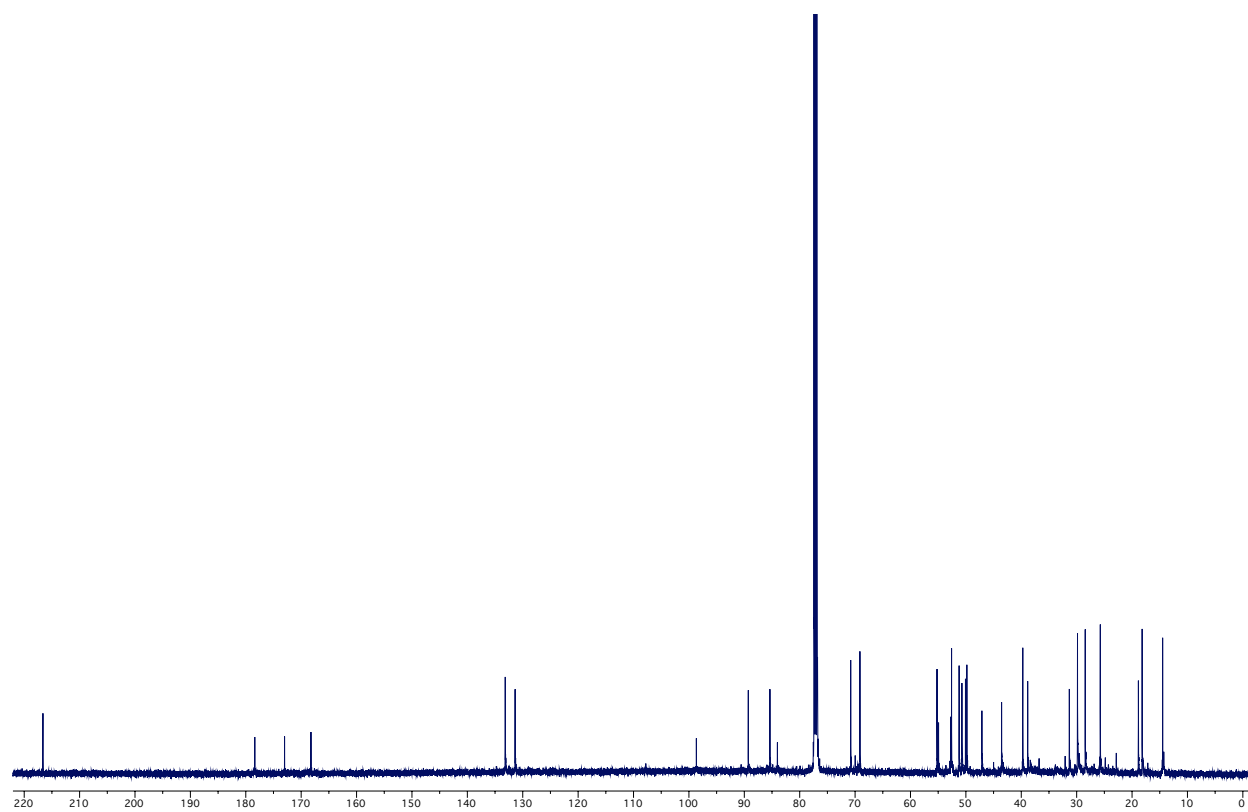

$^1\text{H}$  (500 MHz) and  $^{13}\text{C}$  (125 MHz) NMR of **31** in  $\text{CDCl}_3$

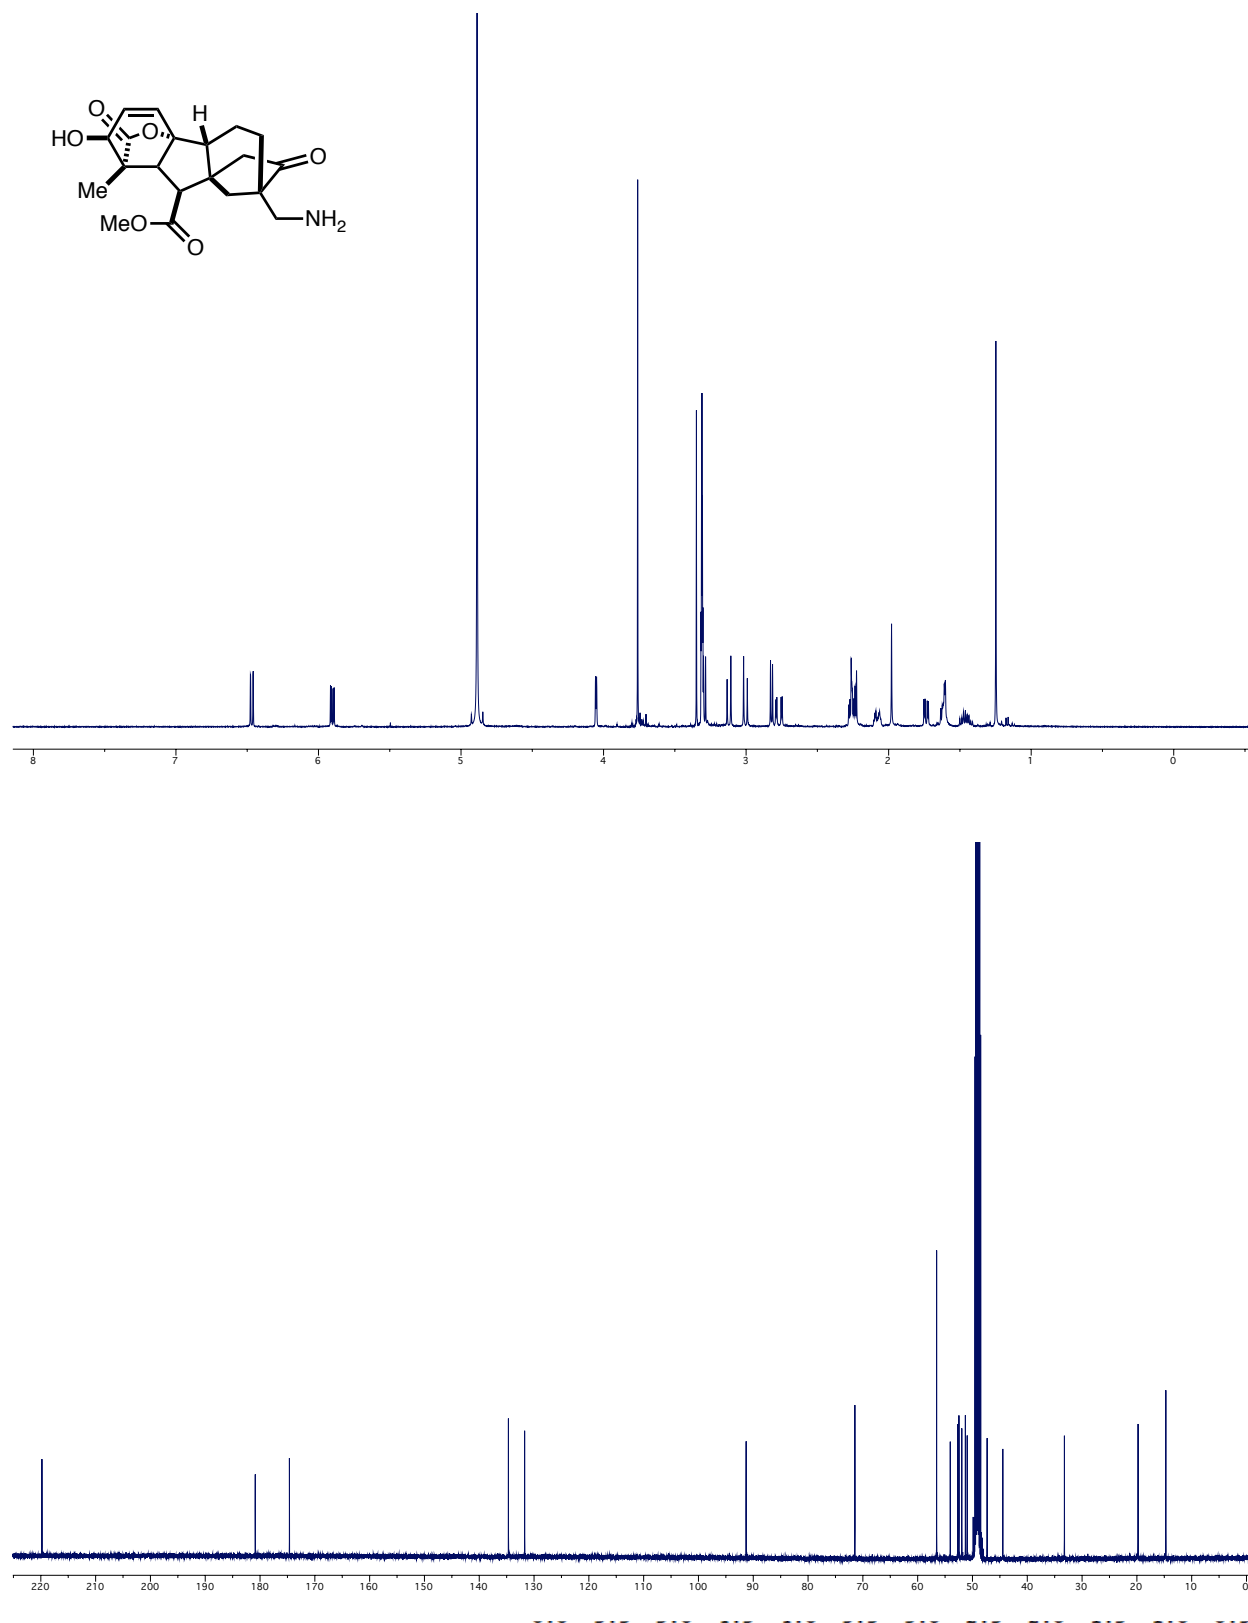

$^1\text{H}$  (500 MHz) and  $^{13}\text{C}$  (125 MHz) NMR of **32** in CD<sub>3</sub>OD

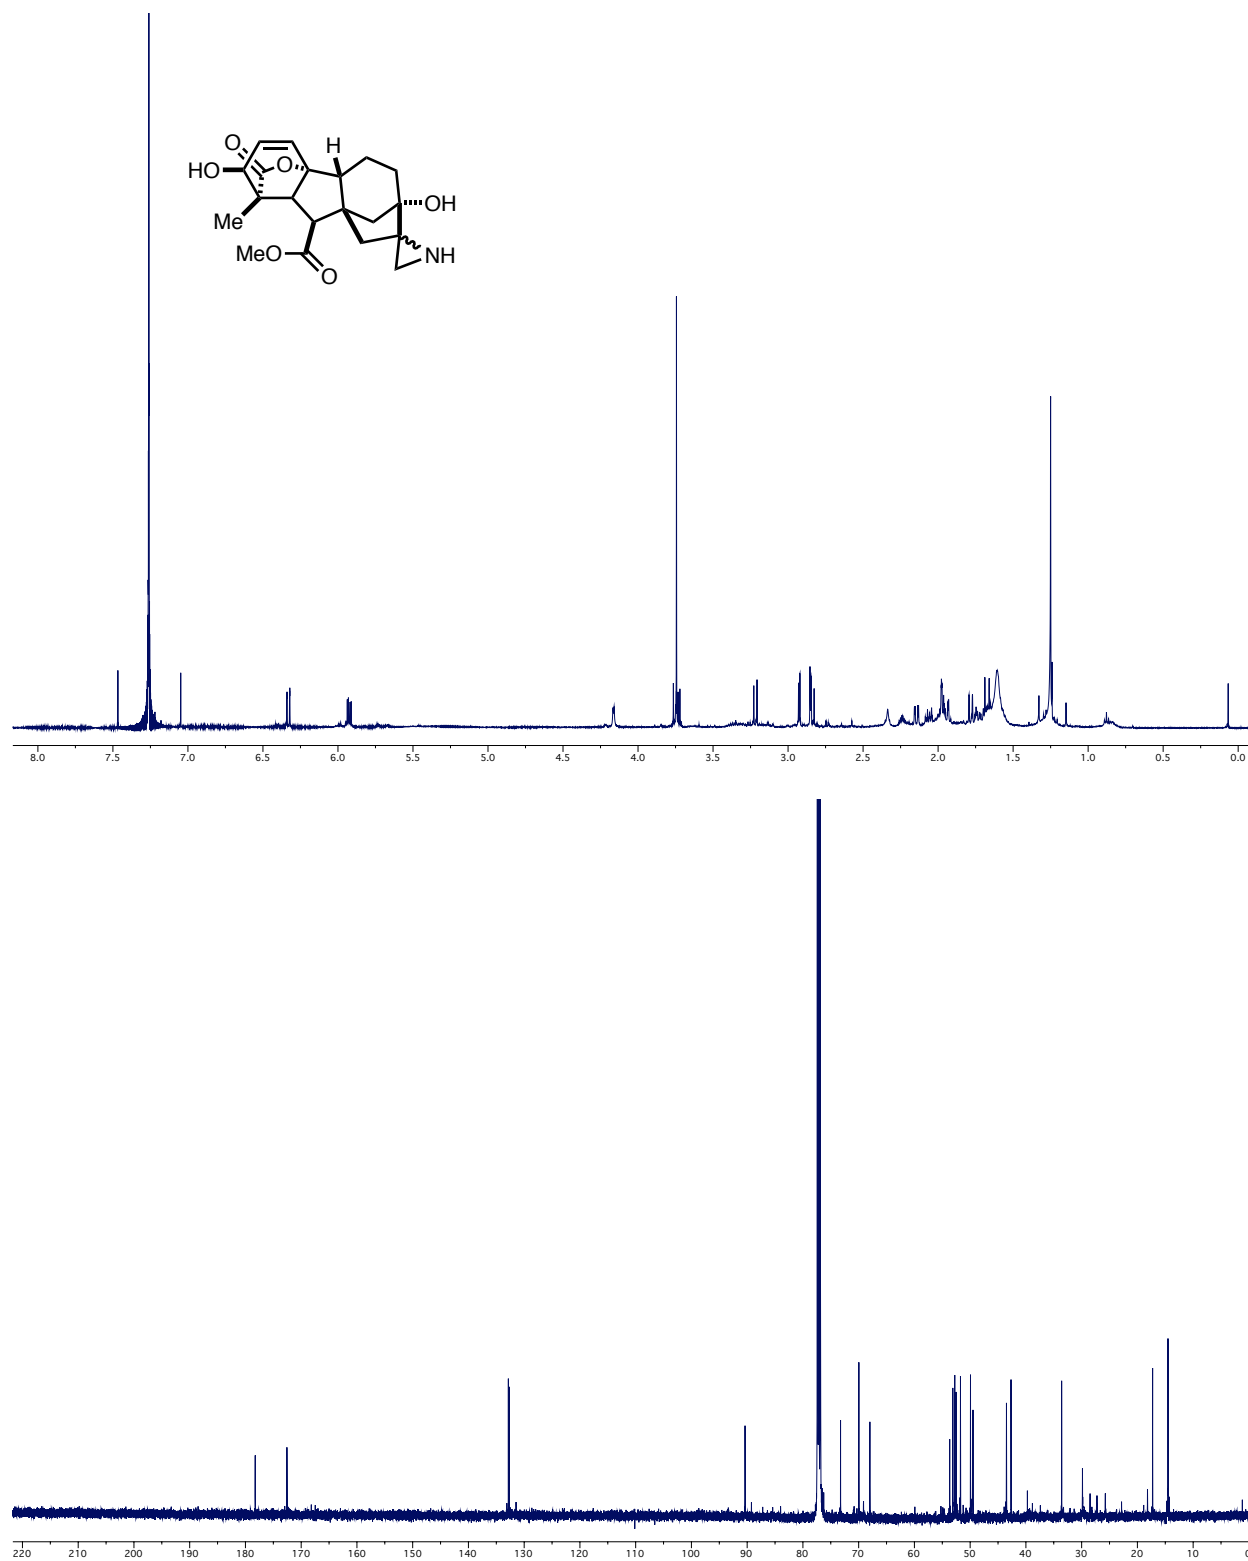

$^1\text{H}$  (500 MHz) and  $^{13}\text{C}$  (125 MHz) NMR of **33** (major isomer) in  $\text{CDCl}_3$

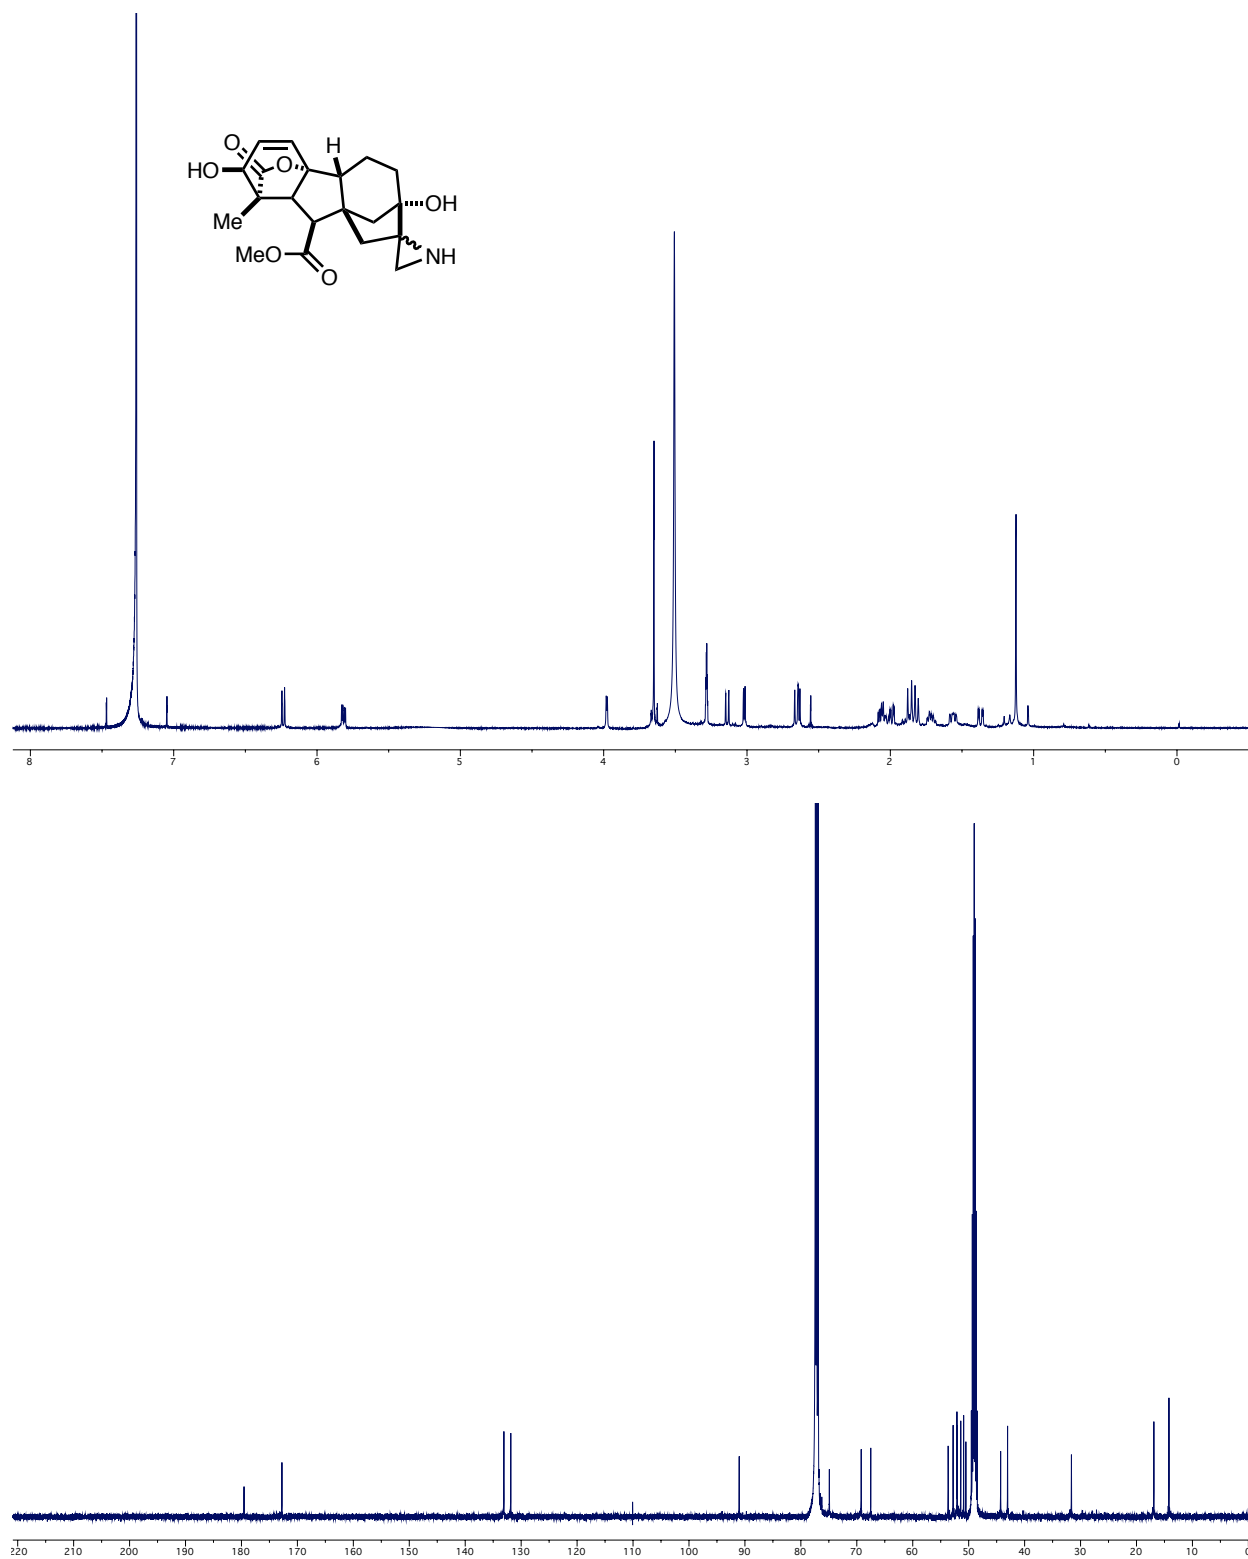

$^1\text{H}$  (500 MHz) and  $^{13}\text{C}$  (125 MHz) NMR of **33** (minor isomer) in  $\text{CDCl}_3 + \text{CD}_3\text{OD}$

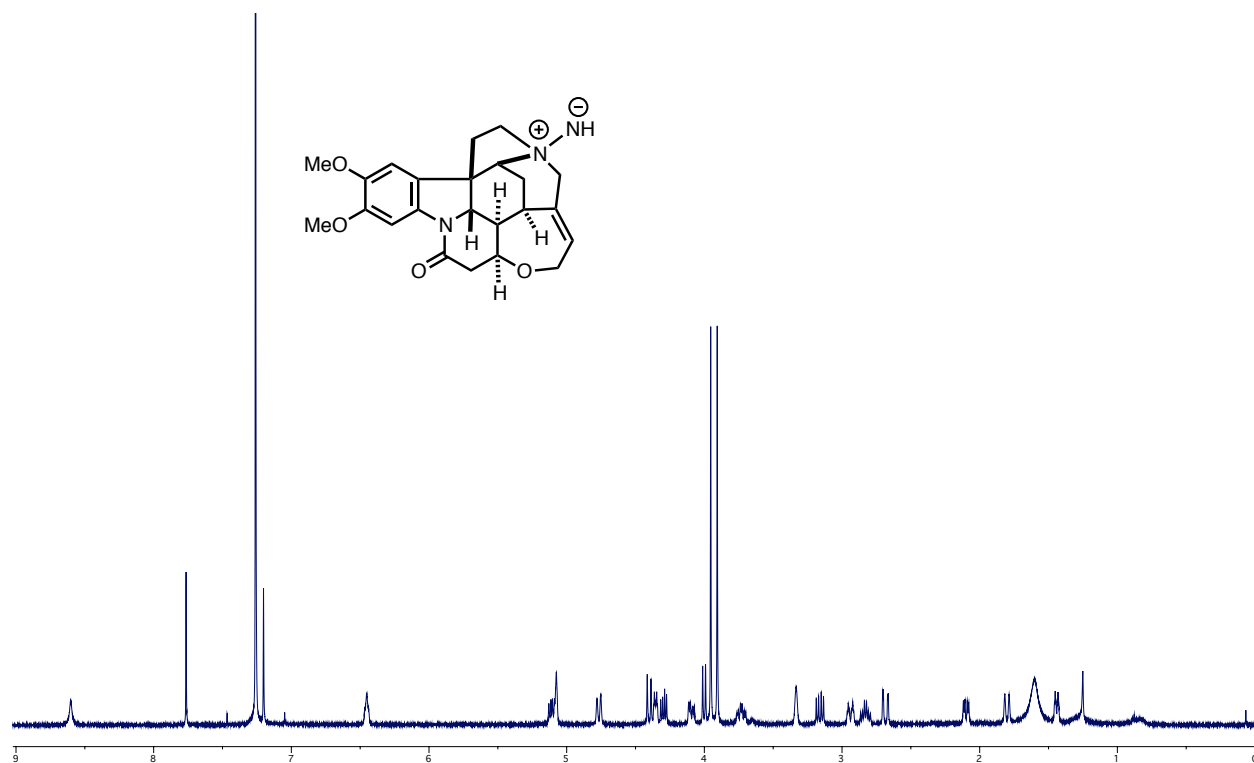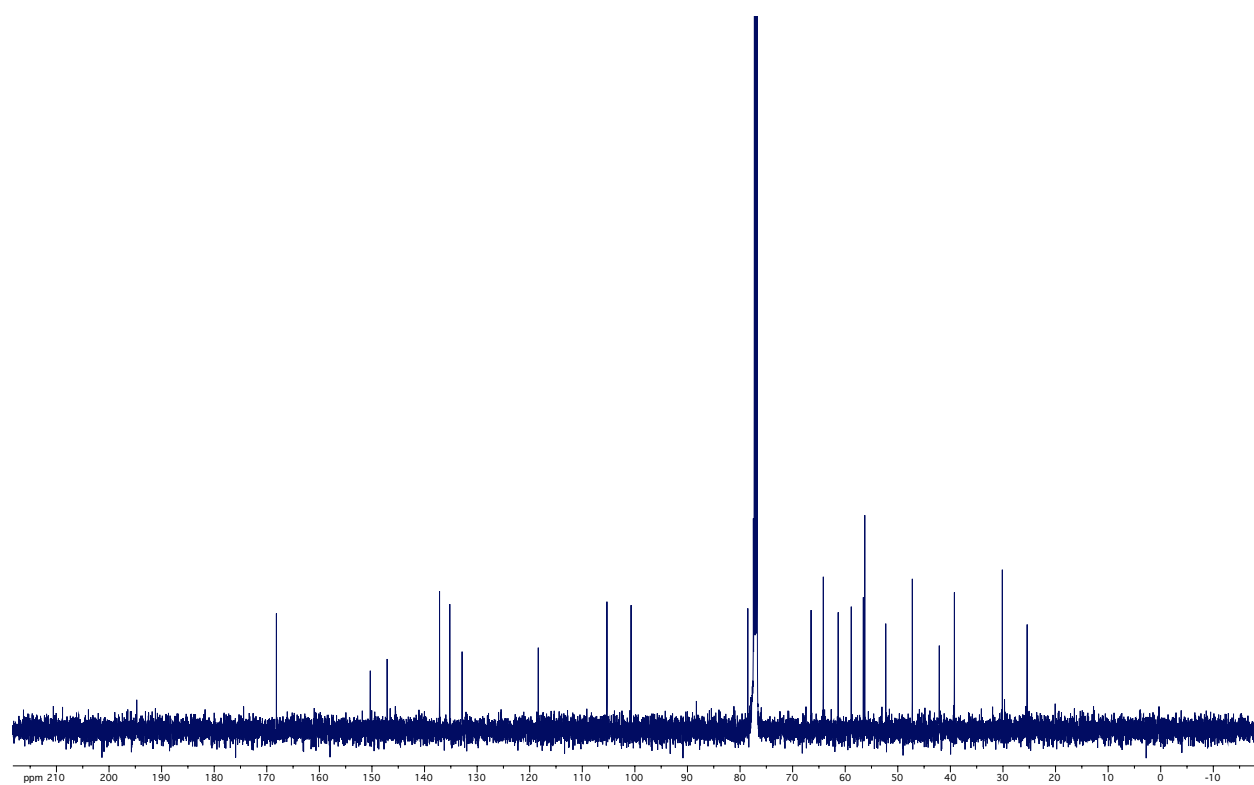

<sup>1</sup>H (500 MHz) and <sup>13</sup>C (125 MHz) NMR of **34** in CDCl<sub>3</sub>
